# Supplementary material
Source: PubMed Central journal article supplement (PMC2701338)
Supplement: ddp204_1.pdf [file ddp204_1.pdf]

## **The DISC locus and schizophrenia – Evidence from an association study in a central European sample and from a meta-analysis across different European populations**

Johannes Schumacher<sup>1,2\*</sup>, Gonzalo Laje<sup>1</sup>, Rami Abou Jamra<sup>2</sup>, Tim Becker<sup>3</sup>,  
Thomas W Mühleisen<sup>4</sup>, Catalina Vasilescu<sup>4</sup>, Manuel Mattheisen<sup>2,4</sup>, Stefan Herms<sup>4</sup>,  
Per Hoffmann<sup>4</sup>, Axel M Hillmer<sup>4</sup>, Alexander Georgi<sup>5</sup>, Christine Herold<sup>3</sup>,  
Thomas G Schulze<sup>1,5</sup>, Peter Propping<sup>2</sup>, Marcella Rietschel<sup>5</sup>,  
Francis J McMahon<sup>1</sup>, Markus M Nöthen<sup>2,4</sup>, Sven Cichon<sup>2,4</sup>

### **SUPPLEMENTARY MATERIAL**

#### **SUPPLEMENTARY METHODS**

##### Determining the genetic homogeneity of the sample

To prevent the potential inflation of association results secondary to admixture, we used *Structure v. 2.2* (1,2) to derive the number of populations present (K) by assessing the multi-locus chi-square value in a set of 84 unlinked SNPs located at nine different chromosomal regions with no evidence for an inter-marker LD (defined by  $r^2 < 0.7$ ). We ran *Structure* for 20,000 burn-in steps followed by 20,000 replications. The results implied that our cases and controls represented a homogenous population (K=1) and, consequently, no further correction for population structure was performed.

##### Screening procedure for psychiatric disorders in control subjects

After agreeing to participate in the study, controls underwent a thorough clinical assessment by a psychiatrist/psychologist; if current or past psychiatric disorder was suspected, study participants completed a structured SCID-I Interview. For the purpose of

this study, only those control subjects with no psychiatric DSM-IV Axis I diagnoses were included.

Definition of lifetime history of depressive symptoms (DEP)

A positive rating of lifetime history of depressive symptoms (DEP) was noted if patients met one of the two first DSM-IV criteria for a major depressive disorder (depressed mood and loss of interest/pleasure) and at least four of the remaining seven criteria (weight loss/appetite changes; sleep disturbances; agitation/retardation; fatigue/loss of energy; feelings of worthlessness/inappropriate guilt; problems concentrating; thoughts of death/suicidality) for a duration of at least two weeks. Only episodes occurring outside psychotic episodes were considered. The same criteria have been used previously (3).

## SUPPLEMENTARY TABLES AND FIGURES

### Supplementary Figure 1

The *DISC* locus: **a)** The *TSNAX* and *DISC1* genes are shown using the UCSC Genome Browser. The location of *DISC2*, which is not listed as a RefSeq gene, is schematically given using a green arrow. The blue block indicates the location of *DISC1* haplotype-blocks 22 and 23. Below is the haplotype-block structure obtained according to Gabriel and colleagues (4) using all analyzed markers and HaploView (the short arrow indicates block 22, the long arrow indicates block 23). **b)** Imputed and genotyped *DISC* association results in the case-control female sample. **c)** Imputed and genotyped *DISC* association results in the case-control male sample.

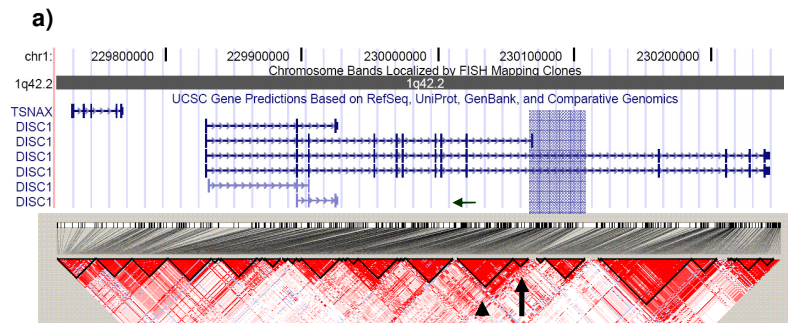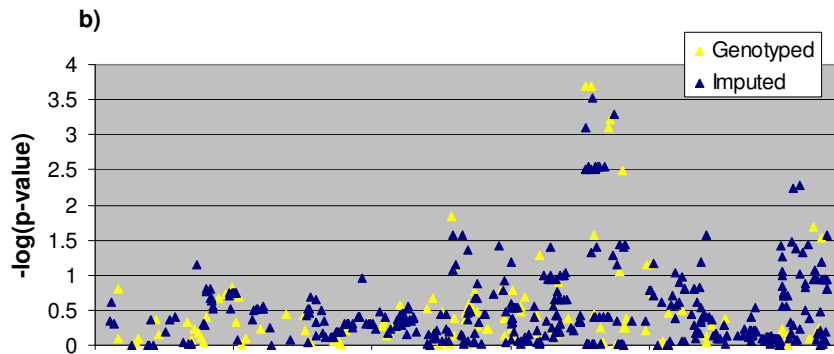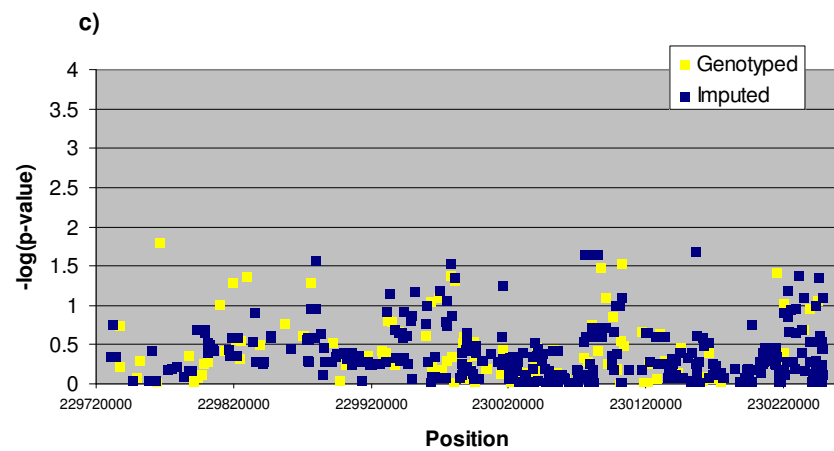

## Supplementary Table 1

Association findings at the *DISC1* locus in samples with schizophrenia (adapted and modified from Table 1 in Chubb and colleagues (5))

| Study                              | # of <i>DISC1</i> variants | Sample                            | Origin         | 80% Power <sub>1</sub> ( $\alpha$ 0.05) | Associated marker/haplotype: Location within <i>DISC1</i>                                           |
|------------------------------------|----------------------------|-----------------------------------|----------------|-----------------------------------------|-----------------------------------------------------------------------------------------------------|
| Hennah et al. (6)                  | 28                         | 458 Schizophrenia families        | Finland        | -                                       | HEP1: Exon 9 - Intron 9, HEP2*: Intron 4 ( <i>TSNAX</i> ), HEP3#: Intron 1 - Exon 2, HEP4*: Exon 13 |
| Hodgkinson et al. (7) <sup>2</sup> | 39                         | 196 patients vs. 217 controls     | North American | 0.16 / 0.45                             | rs6675281 (Leu607Phe): Exon 9, hap3 and hap8: Intron 8 - Intron 9                                   |
| Kockelkorn et al. (8)              | 6                          | 532 patients vs. 519 controls     | Japan          | 0.35 / 0.82                             | -                                                                                                   |
| Callicott et al. (9)               | 12                         | 252 patients vs. 238 controls     | North American | 0.19 / 0.55                             | rs821616 (Ser704Cys): Exon 11, 3-marker haplotype: Intron 9 - Exon 11                               |
| Thomson et al. (10)                | 30                         | 394 patients vs. 478 controls     | Scottish       | 0.30 / 0.76                             | rs2812393*, rs1322784*: Intron 6                                                                    |
| Zhang et al. (11)                  | 15                         | 338 patients vs. 318 controls     | Japan          | 0.24 / 0.63                             | -                                                                                                   |
| Hashimoto et al. (12)              | 13                         | 856 patients vs. 717 controls     | Japan          | 0.48 / 0.94                             | rs821577: Intron 9                                                                                  |
| Zhang et al. (13)                  | 4                          | 677 patients vs. 648 controls     | Scottish       | 0.43 / 0.90                             | 2-marker haplotype: Intron 1 - Exon 2                                                               |
| Chen et al. (14)                   | 3                          | 560 patients vs. 576 controls     | Han Chinese    | 0.38 / 0.86                             | rs2295959*#: Intron 9                                                                               |
| Qu et al. (15)                     | 4                          | 313 patients vs. 317 controls     | Han Chinese    | 0.23 / 0.62                             | 4-marker haplotype: Intron 10 - Exon 10                                                             |
| Wood et al. (16)                   | 71                         | 311 patients vs. 291 controls     | North American | 0.22 / 0.60                             | -                                                                                                   |
| Sanders et al. (17)                | 115                        | 1,678 patients vs. 2,002 controls | North American | 0.84 / 0.99                             | -                                                                                                   |
| Hennah et al. (18)                 | 67                         | 348 patients vs. 351 controls     | UK (London)    | 0.25 / 0.66                             | Block 10-12#: Intron 9                                                                              |
|                                    |                            | 328 patients vs. 315 controls     | UK (Edinburgh) | 0.23 / 0.62                             | Block 6-7#: Intron 2 - Intron 3, Block 10-12#: Intron 9, Block 11#: Intron 9                        |
|                                    |                            | 256 patients vs. 255 controls     | UK (Aberdeen)  | 0.20 / 0.53                             | Block 1-3#: Exon 1 - Intron 3, Block 4 and 5#: Intron 4 - Intron 6, Block 19#: Exon 13              |
|                                    |                            | 343 patients vs. 342 controls     | Finland        | 0.25 / 0.65                             | Block 2-3#: Exon 1 - Intron 3, Block 5#: Intron 4 - Intron 6, Block 19#: Exon 13                    |
| Sullivan et al. (19) <sup>3</sup>  | 99                         | 738 patients vs. 733 controls     | North American | 0.46 / 0.93                             | Intron 8 - Intron 9                                                                                 |

For studies with multiple association findings, the most robust findings are reported. Less robust findings are marked with an asterisk (\*). Sex-specific findings are marked with a number sign (#).<sup>1</sup> The power analysis was performed using the Genetic Power Calculator (Purcell et al. (20)) and was based on the following parameters: 80% power, alpha 0.05, allelic test (df 1), risk allele frequency 0.10, disease prevalence in the general population of 0.015, two different genotypic relative risks (GRR): 1.25 / 1.5 (additive model).<sup>2</sup> The sample overlaps with the genome-wide association (GWA) sample used in the study by Lencz et al. (21).<sup>3</sup> *DISC1* markers were genotyped in a fill-in procedure through a GWA study (Affymetrix 500K two-chip platform plus a custom 164K fill-in chip).

## Supplementary Table 2

Single-marker association results at the *DISC* locus in schizophrenia cases and controls

| Block <sup>1</sup> | SNP              | i/g <sup>2</sup> | Position  | Inter-bp | AAS <sup>3</sup> | MA <sup>4</sup> | All (782 cases, 839 controls) |                      |                |      |                  | Females (254 cases, 358 controls) |                      |                |      |                  | Males (428 cases, 481 controls) |                      |                |      |                  |
|--------------------|------------------|------------------|-----------|----------|------------------|-----------------|-------------------------------|----------------------|----------------|------|------------------|-----------------------------------|----------------------|----------------|------|------------------|---------------------------------|----------------------|----------------|------|------------------|
|                    |                  |                  |           |          |                  |                 | Case <sup>5</sup>             | Control <sup>6</sup> | P <sup>7</sup> | OR   | P p <sup>8</sup> | Case <sup>5</sup>                 | Control <sup>6</sup> | P <sup>7</sup> | OR   | P p <sup>8</sup> | Case <sup>5</sup>               | Control <sup>6</sup> | P <sup>7</sup> | OR   | P p <sup>8</sup> |
|                    | rs1630250        | i                | 229730826 |          | -                | C               | 0.321                         | 0.322                | 0.9319         | 0.99 | 1.00             | 0.331                             | 0.313                | 0.4608         | 1.09 | 1.00             | 0.313                           | 0.329                | 0.4417         | 0.93 | 1.00             |
| 1                  | rs1621135        | i                | 229731376 | 550      | -                | A               | 0.054                         | 0.057                | 0.7618         | 0.96 | 1.00             | 0.060                             | 0.046                | 0.2489         | 1.31 | 1.00             | 0.050                           | 0.065                | 0.1724         | 0.76 | 1.00             |
| 1                  | rs2808579        | i                | 229733891 | 2515     | -                | A               | 0.320                         | 0.322                | 0.9013         | 0.99 | 1.00             | 0.329                             | 0.313                | 0.4957         | 1.08 | 1.00             | 0.313                           | 0.329                | 0.4417         | 0.93 | 1.00             |
| 1                  | rs1655290        | g                | 229736450 | 2559     | -                | G               | 0.124                         | 0.109                | 0.1894         | 1.15 | 1.00             | 0.125                             | 0.101                | 0.1586         | 1.27 | 1.00             | 0.123                           | 0.115                | 0.5947         | 1.08 | 1.00             |
| 1                  | rs2185336        | g                | 229736523 | 73       | -                | G               | 0.117                         | 0.126                | 0.4024         | 0.91 | 1.00             | 0.125                             | 0.121                | 0.8104         | 1.04 | 1.00             | 0.110                           | 0.130                | 0.1795         | 0.82 | 1.00             |
| 1                  | rs3767754        | i                | 229746285 | 9762     | -                | A               | 0.264                         | 0.265                | 0.9236         | 0.99 | 1.00             | 0.267                             | 0.266                | 0.9875         | 1.00 | 1.00             | 0.261                           | 0.264                | 0.8820         | 0.98 | 1.00             |
| 1                  | rs7556048        | g                | 229749264 | 2979     | -                | T               | 0.263                         | 0.267                | 0.8159         | 0.98 | 1.00             | 0.266                             | 0.269                | 0.9117         | 0.99 | 1.00             | 0.260                           | 0.265                | 0.8236         | 0.98 | 1.00             |
| 1                  | rs17802224       | g                | 229750870 | 1606     | -                | T               | 0.344                         | 0.356                | 0.4749         | 0.95 | 1.00             | 0.332                             | 0.338                | 0.8091         | 0.97 | 1.00             | 0.354                           | 0.370                | 0.4939         | 0.94 | 1.00             |
| 1                  | rs6667975        | i                | 229758139 | 7269     | -                | G               | 0.264                         | 0.265                | 0.9236         | 0.99 | 1.00             | 0.267                             | 0.266                | 0.9875         | 1.00 | 1.00             | 0.261                           | 0.264                | 0.8820         | 0.98 | 1.00             |
| 1                  | rs3767753        | i                | 229758861 | 722      | -                | A               | 0.264                         | 0.265                | 0.9236         | 0.99 | 1.00             | 0.267                             | 0.266                | 0.9875         | 1.00 | 1.00             | 0.261                           | 0.264                | 0.8820         | 0.98 | 1.00             |
| 1                  | rs766288         | i                | 229760311 | 1450     | -                | T               | 0.325                         | 0.327                | 0.8887         | 0.99 | 1.00             | 0.335                             | 0.315                | 0.4269         | 1.09 | 1.00             | 0.317                           | 0.336                | 0.3749         | 0.92 | 1.00             |
| 1                  | rs11589784       | i                | 229762372 | 2061     | -                | T               | 0.264                         | 0.265                | 0.9236         | 0.99 | 1.00             | 0.267                             | 0.266                | 0.9875         | 1.00 | 1.00             | 0.261                           | 0.264                | 0.8820         | 0.98 | 1.00             |
| 1                  | rs1982095        | g                | 229763653 | 1281     | -                | T               | 0.382                         | 0.372                | 0.5689         | 1.04 | 1.00             | 0.388                             | 0.368                | 0.4344         | 1.09 | 1.00             | 0.376                           | 0.375                | 0.9500         | 1.01 | 1.00             |
| 1                  | <b>rs1655285</b> | g                | 229766097 | 2444     | -                | G               | 0.123                         | 0.106                | 0.1292         | 1.18 | 1.00             | 0.123                             | 0.130                | 0.6925         | 0.94 | 1.00             | 0.123                           | 0.088                | <b>0.0154</b>  | 1.45 | 0.63             |
| 1                  | rs12040246       | i                | 229771352 | 5255     | -                | G               | 0.184                         | 0.192                | 0.5421         | 0.95 | 1.00             | 0.190                             | 0.200                | 0.6491         | 0.94 | 1.00             | 0.178                           | 0.186                | 0.6641         | 0.95 | 1.00             |
| 1                  | rs7533573        | i                | 229774037 | 2685     | -                | A               | 0.331                         | 0.328                | 0.8661         | 1.01 | 1.00             | 0.338                             | 0.318                | 0.4265         | 1.09 | 1.00             | 0.325                           | 0.335                | 0.6350         | 0.95 | 1.00             |
| 1                  | rs1765782        | i                | 229778112 | 4075     | -                | T               | 0.330                         | 0.327                | 0.8680         | 1.01 | 1.00             | 0.338                             | 0.317                | 0.3948         | 1.10 | 1.00             | 0.324                           | 0.335                | 0.5983         | 0.95 | 1.00             |
| 1                  | rs1619386        | i                | 229783285 | 5173     | -                | C               | 0.370                         | 0.365                | 0.7812         | 1.02 | 1.00             | 0.371                             | 0.368                | 0.9173         | 1.01 | 1.00             | 0.369                           | 0.363                | 0.7838         | 1.03 | 1.00             |
| 1                  | rs17802523       | g                | 229786667 | 3382     | -                | G               | 0.087                         | 0.089                | 0.8871         | 0.98 | 1.00             | 0.091                             | 0.080                | 0.4686         | 1.15 | 1.00             | 0.084                           | 0.095                | 0.4229         | 0.88 | 1.00             |
| 1                  | rs1655288        | i                | 229787500 | 833      | -                | G               | 0.378                         | 0.373                | 0.7871         | 1.02 | 1.00             | 0.376                             | 0.378                | 0.9583         | 0.99 | 1.00             | 0.378                           | 0.369                | 0.6871         | 1.04 | 1.00             |
| 1                  | rs3120734        | g                | 229789217 | 1717     | -                | G               | 0.404                         | 0.402                | 0.9333         | 1.01 | 1.00             | 0.400                             | 0.406                | 0.8388         | 0.98 | 1.00             | 0.407                           | 0.400                | 0.7693         | 1.03 | 1.00             |
| 1                  | rs3125933        | i                | 229789268 | 51       | -                | T               | 0.378                         | 0.373                | 0.7871         | 1.02 | 1.00             | 0.376                             | 0.378                | 0.9583         | 0.99 | 1.00             | 0.378                           | 0.369                | 0.6871         | 1.04 | 1.00             |
| 1                  | rs1612154        | g                | 229791491 | 2223     | -                | G               | 0.339                         | 0.333                | 0.7303         | 1.03 | 1.00             | 0.343                             | 0.330                | 0.5883         | 1.06 | 1.00             | 0.336                           | 0.336                | 0.9837         | 1.00 | 1.00             |
| 1                  | rs12024062       | i                | 229793166 | 1675     | -                | C               | 0.040                         | 0.042                | 0.7551         | 0.95 | 1.00             | 0.035                             | 0.054                | 0.0698         | 0.63 | 1.00             | 0.044                           | 0.033                | 0.2021         | 1.36 | 1.00             |
| 1                  | rs1655305        | g                | 229794070 | 904      | -                | T               | 0.396                         | 0.398                | 0.9111         | 0.99 | 1.00             | 0.392                             | 0.403                | 0.6811         | 0.96 | 1.00             | 0.399                           | 0.394                | 0.8308         | 1.02 | 1.00             |
| 1                  | rs1765791        | g                | 229796744 | 2674     | -                | G               | 0.406                         | 0.406                | 0.9819         | 1.00 | 1.00             | 0.402                             | 0.410                | 0.7647         | 0.97 | 1.00             | 0.409                           | 0.403                | 0.7674         | 1.03 | 1.00             |
| 1                  | rs1655304        | g                | 229797966 | 1222     | -                | C               | 0.449                         | 0.442                | 0.6780         | 1.03 | 1.00             | 0.452                             | 0.455                | 0.9077         | 0.99 | 1.00             | 0.446                           | 0.432                | 0.5312         | 1.06 | 1.00             |
| 2                  | rs6658979        | i                | 229798254 | 288      | -                | G               | 0.458                         | 0.433                | 0.1504         | 1.11 | 1.00             | 0.465                             | 0.447                | 0.4841         | 1.08 | 1.00             | 0.452                           | 0.423                | 0.2022         | 1.13 | 1.00             |
| 2                  | rs1765777        | i                | 229798365 | 111      | -                | C               | 0.458                         | 0.433                | 0.1504         | 1.11 | 1.00             | 0.465                             | 0.447                | 0.4841         | 1.08 | 1.00             | 0.452                           | 0.423                | 0.2022         | 1.13 | 1.00             |
| 2                  | rs1765778        | i                | 229798979 | 614      | -                | G               | 0.456                         | 0.433                | 0.1725         | 1.10 | 1.00             | 0.464                             | 0.447                | 0.5179         | 1.07 | 1.00             | 0.450                           | 0.422                | 0.2217         | 1.12 | 1.00             |
| 2                  | rs1655297        | i                | 229800310 | 1331     | -                | C               | 0.419                         | 0.392                | 0.1130         | 1.12 | 1.00             | 0.431                             | 0.394                | 0.1568         | 1.16 | 1.00             | 0.409                           | 0.390                | 0.4001         | 1.08 | 1.00             |
| 2                  | rs1655296        | g                | 229800418 | 108      | -                | C               | 0.402                         | 0.384                | 0.2821         | 1.08 | 1.00             | 0.414                             | 0.392                | 0.3881         | 1.10 | 1.00             | 0.392                           | 0.378                | 0.5244         | 1.06 | 1.00             |
| 2                  | rs1655295        | i                | 229800624 | 206      | -                | T               | 0.419                         | 0.390                | 0.0914         | 1.13 | 1.00             | 0.428                             | 0.393                | 0.1732         | 1.16 | 1.00             | 0.411                           | 0.388                | 0.3023         | 1.10 | 1.00             |
| 2                  | rs10864685       | i                | 229802898 | 2274     | -                | A               | 0.411                         | 0.382                | 0.0891         | 1.13 | 1.00             | 0.421                             | 0.385                | 0.1576         | 1.16 | 1.00             | 0.403                           | 0.381                | 0.3165         | 1.10 | 1.00             |

|   |                  |   |           |       |   |   |       |       |               |      |      |       |       |        |      |      |       |       |               |      |      |
|---|------------------|---|-----------|-------|---|---|-------|-------|---------------|------|------|-------|-------|--------|------|------|-------|-------|---------------|------|------|
| 2 | rs9651125        | i | 229803236 | 338   | - | G | 0.416 | 0.391 | 0.1315        | 1.11 | 1.00 | 0.425 | 0.393 | 0.2095 | 1.14 | 1.00 | 0.409 | 0.389 | 0.3752        | 1.09 | 1.00 |
| 2 | rs6656071        | i | 229804323 | 1087  | - | C | 0.416 | 0.391 | 0.1315        | 1.11 | 1.00 | 0.425 | 0.393 | 0.2095 | 1.14 | 1.00 | 0.409 | 0.389 | 0.3752        | 1.09 | 1.00 |
| 2 | rs6679985        | i | 229804452 | 129   | - | G | 0.415 | 0.389 | 0.1325        | 1.11 | 1.00 | 0.424 | 0.393 | 0.2296 | 1.14 | 1.00 | 0.408 | 0.387 | 0.3535        | 1.09 | 1.00 |
| 2 | rs6674294        | i | 229805008 | 556   | - | T | 0.414 | 0.389 | 0.1524        | 1.11 | 1.00 | 0.421 | 0.393 | 0.2739 | 1.12 | 1.00 | 0.408 | 0.387 | 0.3535        | 1.09 | 1.00 |
| 2 | rs6683094        | i | 229805188 | 180   | - | G | 0.413 | 0.389 | 0.1744        | 1.10 | 1.00 | 0.419 | 0.393 | 0.2981 | 1.12 | 1.00 | 0.407 | 0.387 | 0.3799        | 1.09 | 1.00 |
| 2 | <b>rs4658879</b> | g | 229809198 | 4010  | - | T | 0.194 | 0.166 | <b>0.0369</b> | 1.21 | 0.89 | 0.199 | 0.173 | 0.2098 | 1.19 | 1.00 | 0.190 | 0.161 | 0.0984        | 1.23 | 1.00 |
| 2 | rs892356         | g | 229813573 | 4375  | - | G | 0.357 | 0.332 | 0.1230        | 1.12 | 1.00 | 0.367 | 0.334 | 0.1879 | 1.16 | 1.00 | 0.350 | 0.330 | 0.3838        | 1.09 | 1.00 |
| 2 | rs1025527        | i | 229816468 | 2895  | - | A | 0.356 | 0.331 | 0.1233        | 1.12 | 1.00 | 0.364 | 0.332 | 0.1947 | 1.15 | 1.00 | 0.350 | 0.330 | 0.3701        | 1.09 | 1.00 |
| 2 | rs1025526        | i | 229817264 | 796   | - | C | 0.357 | 0.332 | 0.1318        | 1.12 | 1.00 | 0.367 | 0.333 | 0.1765 | 1.16 | 1.00 | 0.349 | 0.331 | 0.4248        | 1.08 | 1.00 |
| 2 | rs4658927        | i | 229818212 | 948   | - | G | 0.182 | 0.162 | 0.1219        | 1.15 | 1.00 | 0.189 | 0.169 | 0.3093 | 1.15 | 1.00 | 0.176 | 0.156 | 0.2535        | 1.15 | 1.00 |
| 2 | rs17746859       | g | 229818855 | 643   | - | T | 0.061 | 0.067 | 0.4820        | 0.90 | 1.00 | 0.063 | 0.046 | 0.1477 | 1.40 | 1.00 | 0.059 | 0.083 | 0.0503        | 0.70 | 0.95 |
| 2 | rs9661331        | i | 229818929 | 74    | - | C | 0.357 | 0.332 | 0.1318        | 1.12 | 1.00 | 0.367 | 0.333 | 0.1765 | 1.16 | 1.00 | 0.349 | 0.331 | 0.4248        | 1.08 | 1.00 |
| 2 | rs6541275        | i | 229819565 | 636   | - | A | 0.357 | 0.332 | 0.1318        | 1.12 | 1.00 | 0.367 | 0.333 | 0.1765 | 1.16 | 1.00 | 0.349 | 0.331 | 0.4248        | 1.08 | 1.00 |
| 2 | rs6541279        | i | 229820086 | 521   | - | G | 0.357 | 0.332 | 0.1318        | 1.12 | 1.00 | 0.367 | 0.333 | 0.1765 | 1.16 | 1.00 | 0.349 | 0.331 | 0.4248        | 1.08 | 1.00 |
| 2 | rs4603118        | i | 229821223 | 1137  | - | A | 0.357 | 0.332 | 0.1318        | 1.12 | 1.00 | 0.367 | 0.333 | 0.1765 | 1.16 | 1.00 | 0.349 | 0.331 | 0.4248        | 1.08 | 1.00 |
| 2 | rs6541280        | g | 229821502 | 279   | - | G | 0.401 | 0.379 | 0.1859        | 1.10 | 1.00 | 0.406 | 0.388 | 0.4773 | 1.08 | 1.00 | 0.397 | 0.372 | 0.2655        | 1.11 | 1.00 |
| 2 | rs6656080        | i | 229821888 | 386   | - | G | 0.357 | 0.332 | 0.1318        | 1.12 | 1.00 | 0.367 | 0.333 | 0.1765 | 1.16 | 1.00 | 0.349 | 0.331 | 0.4248        | 1.08 | 1.00 |
| 2 | rs1030711        | i | 229822084 | 196   | - | A | 0.357 | 0.332 | 0.1318        | 1.12 | 1.00 | 0.367 | 0.333 | 0.1765 | 1.16 | 1.00 | 0.349 | 0.331 | 0.4248        | 1.08 | 1.00 |
| 2 | rs1030710        | i | 229822892 | 808   | - | T | 0.080 | 0.071 | 0.3185        | 1.14 | 1.00 | 0.093 | 0.090 | 0.8228 | 1.04 | 1.00 | 0.069 | 0.057 | 0.2587        | 1.24 | 1.00 |
| 3 | rs9659663        | g | 229823683 | 791   | - | A | 0.357 | 0.334 | 0.1652        | 1.11 | 1.00 | 0.367 | 0.335 | 0.2073 | 1.15 | 1.00 | 0.349 | 0.333 | 0.4753        | 1.07 | 1.00 |
| 3 | rs10746510       | g | 229825561 | 1878  | - | T | 0.063 | 0.056 | 0.3927        | 1.14 | 1.00 | 0.063 | 0.062 | 0.9565 | 1.01 | 1.00 | 0.064 | 0.052 | 0.2746        | 1.25 | 1.00 |
| 3 | <b>rs3738398</b> | g | 229828963 | 3402  | - | G | 0.467 | 0.444 | 0.1768        | 1.10 | 1.00 | 0.457 | 0.463 | 0.7969 | 0.97 | 1.00 | 0.477 | 0.429 | <b>0.0437</b> | 1.21 | 0.92 |
| 3 | rs823167         | i | 229833853 | 4890  | - | A | 0.438 | 0.415 | 0.1816        | 1.10 | 1.00 | 0.443 | 0.423 | 0.4299 | 1.09 | 1.00 | 0.433 | 0.408 | 0.2857        | 1.11 | 1.00 |
| 3 | rs2082552        | i | 229834513 | 660   | - | C | 0.196 | 0.172 | 0.0666        | 1.18 | 1.00 | 0.200 | 0.179 | 0.3148 | 1.14 | 1.00 | 0.193 | 0.166 | 0.1223        | 1.21 | 1.00 |
| 3 | rs823165         | i | 229836069 | 1556  | - | A | 0.364 | 0.345 | 0.2406        | 1.09 | 1.00 | 0.374 | 0.348 | 0.3056 | 1.12 | 1.00 | 0.357 | 0.343 | 0.5214        | 1.07 | 1.00 |
| 3 | rs823163         | i | 229837731 | 1662  | - | G | 0.364 | 0.345 | 0.2406        | 1.09 | 1.00 | 0.374 | 0.348 | 0.3056 | 1.12 | 1.00 | 0.357 | 0.343 | 0.5214        | 1.07 | 1.00 |
| 3 | rs823162         | g | 229839036 | 1305  | - | G | 0.082 | 0.071 | 0.2511        | 1.16 | 1.00 | 0.091 | 0.083 | 0.5939 | 1.11 | 1.00 | 0.074 | 0.062 | 0.3087        | 1.21 | 1.00 |
| 3 | rs1094656        | i | 229840298 | 1262  | - | C | 0.364 | 0.345 | 0.2406        | 1.09 | 1.00 | 0.374 | 0.348 | 0.3056 | 1.12 | 1.00 | 0.357 | 0.343 | 0.5214        | 1.07 | 1.00 |
| 3 | rs1094655        | i | 229840985 | 687   | - | G | 0.368 | 0.348 | 0.2360        | 1.09 | 1.00 | 0.379 | 0.352 | 0.2801 | 1.13 | 1.00 | 0.359 | 0.346 | 0.5462        | 1.06 | 1.00 |
| 3 | rs823161         | i | 229841640 | 655   | - | A | 0.364 | 0.345 | 0.2406        | 1.09 | 1.00 | 0.374 | 0.348 | 0.3056 | 1.12 | 1.00 | 0.357 | 0.343 | 0.5214        | 1.07 | 1.00 |
| 3 | rs980394         | i | 229846130 | 4490  | - | A | 0.354 | 0.333 | 0.1986        | 1.10 | 1.00 | 0.358 | 0.344 | 0.5599 | 1.07 | 1.00 | 0.351 | 0.325 | 0.2367        | 1.12 | 1.00 |
| 3 | rs12084975       | i | 229846734 | 604   | - | G | 0.063 | 0.056 | 0.4007        | 1.13 | 1.00 | 0.063 | 0.063 | 1.0000 | 1.00 | 1.00 | 0.064 | 0.051 | 0.2592        | 1.25 | 1.00 |
| 3 | rs4658933        | g | 229857554 | 10820 | - | G | 0.197 | 0.174 | 0.0977        | 1.16 | 1.00 | 0.202 | 0.183 | 0.3646 | 1.13 | 1.00 | 0.193 | 0.168 | 0.1665        | 1.18 | 1.00 |
| 3 | rs1285729        | i | 229860832 | 3278  | - | C | 0.069 | 0.062 | 0.3958        | 1.13 | 1.00 | 0.081 | 0.077 | 0.8259 | 1.04 | 1.00 | 0.060 | 0.050 | 0.3551        | 1.21 | 1.00 |
| 3 | rs1417585        | g | 229870227 | 9395  | - | A | 0.428 | 0.402 | 0.1393        | 1.11 | 1.00 | 0.434 | 0.411 | 0.3815 | 1.10 | 1.00 | 0.423 | 0.395 | 0.2406        | 1.12 | 1.00 |
| 3 | rs17804007       | g | 229871213 | 986   | - | C | 0.060 | 0.071 | 0.2097        | 0.84 | 1.00 | 0.057 | 0.064 | 0.6175 | 0.90 | 1.00 | 0.061 | 0.076 | 0.2354        | 0.80 | 1.00 |
| 3 | rs4366301        | i | 229872909 | 1696  | - | C | 0.427 | 0.402 | 0.1503        | 1.11 | 1.00 | 0.436 | 0.413 | 0.3733 | 1.10 | 1.00 | 0.419 | 0.394 | 0.2685        | 1.11 | 1.00 |
| 3 | rs11122318       | i | 229873475 | 566   | - | C | 0.364 | 0.344 | 0.2267        | 1.09 | 1.00 | 0.374 | 0.348 | 0.3056 | 1.12 | 1.00 | 0.357 | 0.342 | 0.4915        | 1.07 | 1.00 |
| 3 | rs9651121        | i | 229873917 | 442   | - | C | 0.063 | 0.057 | 0.4429        | 1.12 | 1.00 | 0.063 | 0.064 | 0.9152 | 0.98 | 1.00 | 0.064 | 0.051 | 0.2592        | 1.25 | 1.00 |
| 3 | rs11122319       | i | 229874905 | 988   | - | G | 0.427 | 0.402 | 0.1408        | 1.11 | 1.00 | 0.436 | 0.412 | 0.3457 | 1.11 | 1.00 | 0.419 | 0.394 | 0.2685        | 1.11 | 1.00 |

|   |                         |   |           |      |   |   |       |       |               |      |      |       |       |        |      |      |       |       |               |      |      |
|---|-------------------------|---|-----------|------|---|---|-------|-------|---------------|------|------|-------|-------|--------|------|------|-------|-------|---------------|------|------|
| 3 | rs12030517              | i | 229875008 | 103  | - | C | 0.364 | 0.344 | 0.2414        | 1.09 | 1.00 | 0.374 | 0.348 | 0.3056 | 1.12 | 1.00 | 0.356 | 0.342 | 0.5242        | 1.06 | 1.00 |
| 3 | <b>rs16854753</b>       | i | 229875334 | 326  | - | A | 0.199 | 0.171 | <b>0.0394</b> | 1.20 | 0.98 | 0.204 | 0.178 | 0.2039 | 1.19 | 1.00 | 0.194 | 0.166 | 0.1081        | 1.22 | 1.00 |
| 3 | rs17804163 <sup>9</sup> | g | 229875338 | 4    | - | T | 0.146 | 0.165 | 0.1271        | 0.86 | 1.00 | 0.154 | 0.155 | 0.9331 | 0.99 | 1.00 | 0.139 | 0.172 | 0.0504        | 0.78 | 0.95 |
| 3 | rs17815196              | i | 229879005 | 3667 | - | G | 0.051 | 0.049 | 0.7259        | 1.06 | 1.00 | 0.050 | 0.058 | 0.4780 | 0.85 | 1.00 | 0.052 | 0.041 | 0.2561        | 1.29 | 1.00 |
| 3 | <b>rs6541281</b>        | i | 229879757 | 752  | - | T | 0.461 | 0.494 | 0.0538        | 0.87 | 1.00 | 0.453 | 0.462 | 0.7252 | 0.96 | 1.00 | 0.467 | 0.519 | <b>0.0269</b> | 0.81 | 0.94 |
| 3 | <b>rs4658882</b>        | i | 229879828 | 71   | - | A | 0.198 | 0.171 | <b>0.0440</b> | 1.20 | 0.99 | 0.203 | 0.178 | 0.2283 | 1.18 | 1.00 | 0.194 | 0.166 | 0.1081        | 1.22 | 1.00 |
| 3 | rs12042938              | i | 229883465 | 3637 | - | T | 0.428 | 0.401 | 0.1142        | 1.12 | 1.00 | 0.436 | 0.410 | 0.3194 | 1.11 | 1.00 | 0.422 | 0.394 | 0.2280        | 1.12 | 1.00 |
| 3 | rs11122320              | i | 229884221 | 756  | - | T | 0.066 | 0.061 | 0.5759        | 1.08 | 1.00 | 0.076 | 0.071 | 0.6749 | 1.09 | 1.00 | 0.057 | 0.054 | 0.7544        | 1.07 | 1.00 |
|   | rs1417584               | i | 229885673 | 1452 | - | C | 0.443 | 0.422 | 0.2240        | 1.09 | 1.00 | 0.446 | 0.427 | 0.4601 | 1.08 | 1.00 | 0.440 | 0.418 | 0.3376        | 1.09 | 1.00 |
| 4 | rs12034296              | i | 229886700 | 1027 | - | A | 0.329 | 0.319 | 0.5042        | 1.05 | 1.00 | 0.322 | 0.315 | 0.7743 | 1.03 | 1.00 | 0.335 | 0.321 | 0.5144        | 1.07 | 1.00 |
| 4 | rs10429978              | i | 229890285 | 3585 | - | T | 0.329 | 0.319 | 0.5042        | 1.05 | 1.00 | 0.322 | 0.315 | 0.7743 | 1.03 | 1.00 | 0.335 | 0.321 | 0.5144        | 1.07 | 1.00 |
| 4 | rs11589082              | i | 229891279 | 994  | - | A | 0.329 | 0.319 | 0.5042        | 1.05 | 1.00 | 0.322 | 0.315 | 0.7743 | 1.03 | 1.00 | 0.335 | 0.321 | 0.5144        | 1.07 | 1.00 |
| 4 | rs1977797               | i | 229891697 | 418  | - | A | 0.329 | 0.319 | 0.5042        | 1.05 | 1.00 | 0.322 | 0.315 | 0.7743 | 1.03 | 1.00 | 0.335 | 0.321 | 0.5144        | 1.07 | 1.00 |
| 4 | rs1572899               | g | 229892113 | 416  | - | G | 0.335 | 0.321 | 0.3907        | 1.07 | 1.00 | 0.324 | 0.320 | 0.8844 | 1.02 | 1.00 | 0.344 | 0.321 | 0.3002        | 1.11 | 1.00 |
| 4 | rs16854779              | i | 229893941 | 1828 | - | C | 0.319 | 0.306 | 0.3936        | 1.07 | 1.00 | 0.311 | 0.300 | 0.6535 | 1.05 | 1.00 | 0.326 | 0.310 | 0.4472        | 1.08 | 1.00 |
| 4 | rs16854783              | i | 229893994 | 53   | - | A | 0.319 | 0.306 | 0.3936        | 1.07 | 1.00 | 0.311 | 0.300 | 0.6535 | 1.05 | 1.00 | 0.326 | 0.310 | 0.4472        | 1.08 | 1.00 |
| 4 | rs1538975 <sup>9</sup>  | g | 229894995 | 1001 | - | A | 0.330 | 0.318 | 0.4558        | 1.06 | 1.00 | 0.320 | 0.314 | 0.8127 | 1.03 | 1.00 | 0.338 | 0.321 | 0.4184        | 1.08 | 1.00 |
| 4 | rs1538974               | i | 229895219 | 224  | - | T | 0.320 | 0.306 | 0.3726        | 1.07 | 1.00 | 0.311 | 0.300 | 0.6535 | 1.05 | 1.00 | 0.327 | 0.310 | 0.4166        | 1.08 | 1.00 |
| 4 | rs11583715              | i | 229895662 | 443  | - | C | 0.320 | 0.306 | 0.3726        | 1.07 | 1.00 | 0.311 | 0.300 | 0.6535 | 1.05 | 1.00 | 0.327 | 0.310 | 0.4166        | 1.08 | 1.00 |
| 4 | rs3738401               | g | 229896918 | 1256 | - | A | 0.300 | 0.300 | 0.9829        | 1.00 | 1.00 | 0.291 | 0.293 | 0.9379 | 0.99 | 1.00 | 0.307 | 0.304 | 0.8968        | 1.01 | 1.00 |
| 4 | rs11586191              | i | 229898404 | 1486 | - | C | 0.320 | 0.306 | 0.3726        | 1.07 | 1.00 | 0.311 | 0.300 | 0.6535 | 1.05 | 1.00 | 0.327 | 0.310 | 0.4166        | 1.08 | 1.00 |
| 4 | rs11585959              | i | 229900341 | 1937 | - | C | 0.319 | 0.302 | 0.2834        | 1.08 | 1.00 | 0.311 | 0.295 | 0.4993 | 1.08 | 1.00 | 0.326 | 0.308 | 0.3920        | 1.09 | 1.00 |
| 4 | rs11585981              | g | 229900585 | 244  | - | C | 0.349 | 0.337 | 0.4523        | 1.06 | 1.00 | 0.345 | 0.332 | 0.6272 | 1.06 | 1.00 | 0.353 | 0.340 | 0.5559        | 1.06 | 1.00 |
| 4 | rs17748239              | i | 229901524 | 939  | - | T | 0.317 | 0.302 | 0.3396        | 1.08 | 1.00 | 0.310 | 0.294 | 0.4995 | 1.08 | 1.00 | 0.323 | 0.308 | 0.4843        | 1.07 | 1.00 |
| 4 | rs11122321              | i | 229902233 | 709  | - | C | 0.317 | 0.302 | 0.3396        | 1.08 | 1.00 | 0.310 | 0.294 | 0.4995 | 1.08 | 1.00 | 0.323 | 0.308 | 0.4843        | 1.07 | 1.00 |
| 4 | rs11577035              | i | 229902564 | 331  | - | A | 0.317 | 0.302 | 0.3396        | 1.08 | 1.00 | 0.310 | 0.294 | 0.4995 | 1.08 | 1.00 | 0.323 | 0.308 | 0.4843        | 1.07 | 1.00 |
| 4 | rs12040182              | i | 229905788 | 3224 | - | C | 0.312 | 0.299 | 0.4282        | 1.06 | 1.00 | 0.304 | 0.291 | 0.5758 | 1.07 | 1.00 | 0.318 | 0.306 | 0.5579        | 1.06 | 1.00 |
| 4 | rs16854809              | i | 229905870 | 82   | - | G | 0.319 | 0.302 | 0.2834        | 1.08 | 1.00 | 0.311 | 0.295 | 0.4993 | 1.08 | 1.00 | 0.326 | 0.308 | 0.3920        | 1.09 | 1.00 |
| 4 | rs10429979              | i | 229910192 | 4322 | - | G | 0.321 | 0.303 | 0.2817        | 1.08 | 1.00 | 0.317 | 0.296 | 0.3969 | 1.10 | 1.00 | 0.324 | 0.309 | 0.4816        | 1.07 | 1.00 |
| 4 | rs12043433              | i | 229910214 | 22   | - | G | 0.321 | 0.303 | 0.2817        | 1.08 | 1.00 | 0.317 | 0.296 | 0.3969 | 1.10 | 1.00 | 0.324 | 0.309 | 0.4816        | 1.07 | 1.00 |
| 4 | rs11122322              | i | 229910585 | 371  | - | G | 0.321 | 0.303 | 0.2817        | 1.08 | 1.00 | 0.317 | 0.296 | 0.3969 | 1.10 | 1.00 | 0.324 | 0.309 | 0.4816        | 1.07 | 1.00 |
| 4 | rs12045144              | i | 229910871 | 286  | - | C | 0.323 | 0.304 | 0.2480        | 1.09 | 1.00 | 0.318 | 0.298 | 0.3968 | 1.10 | 1.00 | 0.326 | 0.309 | 0.4191        | 1.08 | 1.00 |
| 4 | rs12044355              | i | 229910970 | 99   | - | C | 0.321 | 0.304 | 0.2984        | 1.08 | 1.00 | 0.317 | 0.296 | 0.3969 | 1.10 | 1.00 | 0.324 | 0.310 | 0.5119        | 1.07 | 1.00 |
| 4 | rs12410426              | i | 229913044 | 2074 | - | C | 0.056 | 0.046 | 0.2199        | 1.22 | 1.00 | 0.064 | 0.045 | 0.1086 | 1.45 | 1.00 | 0.049 | 0.047 | 0.8771        | 1.03 | 1.00 |
| 4 | rs11122323              | i | 229915556 | 2512 | - | A | 0.318 | 0.303 | 0.3564        | 1.07 | 1.00 | 0.314 | 0.298 | 0.4988 | 1.08 | 1.00 | 0.322 | 0.308 | 0.5176        | 1.07 | 1.00 |
| 4 | rs12045248              | i | 229917371 | 1815 | - | G | 0.318 | 0.303 | 0.3564        | 1.07 | 1.00 | 0.314 | 0.298 | 0.4988 | 1.08 | 1.00 | 0.322 | 0.308 | 0.5176        | 1.07 | 1.00 |
| 4 | rs1934909               | g | 229917902 | 531  | - | A | 0.166 | 0.151 | 0.2613        | 1.11 | 1.00 | 0.177 | 0.163 | 0.4659 | 1.11 | 1.00 | 0.156 | 0.143 | 0.4221        | 1.11 | 1.00 |
| 4 | rs6667123               | i | 229918614 | 712  | - | G | 0.318 | 0.303 | 0.3769        | 1.07 | 1.00 | 0.314 | 0.298 | 0.4988 | 1.08 | 1.00 | 0.321 | 0.308 | 0.5520        | 1.06 | 1.00 |
| 4 | rs6693517               | i | 229919067 | 453  | - | A | 0.318 | 0.303 | 0.3769        | 1.07 | 1.00 | 0.314 | 0.298 | 0.4988 | 1.08 | 1.00 | 0.321 | 0.308 | 0.5520        | 1.06 | 1.00 |
| 4 | rs6696914               | i | 229920103 | 1036 | - | A | 0.318 | 0.303 | 0.3769        | 1.07 | 1.00 | 0.314 | 0.298 | 0.4988 | 1.08 | 1.00 | 0.321 | 0.308 | 0.5520        | 1.06 | 1.00 |



|    |            |   |           |      |   |   |       |       |        |      |      |       |       |        |      |      |       |       |        |      |      |
|----|------------|---|-----------|------|---|---|-------|-------|--------|------|------|-------|-------|--------|------|------|-------|-------|--------|------|------|
| 4  | rs1954175  | i | 229922033 | 1930 | - | C | 0.298 | 0.285 | 0.4111 | 1.07 | 1.00 | 0.294 | 0.281 | 0.5782 | 1.07 | 1.00 | 0.301 | 0.288 | 0.5376 | 1.07 | 1.00 |
| 5  | rs11122324 | i | 229925804 | 3771 | - | A | 0.324 | 0.306 | 0.2776 | 1.09 | 1.00 | 0.324 | 0.300 | 0.3365 | 1.12 | 1.00 | 0.324 | 0.311 | 0.5432 | 1.06 | 1.00 |
| 5  | rs6691979  | g | 229927305 | 1501 | - | T | 0.325 | 0.307 | 0.2900 | 1.08 | 1.00 | 0.317 | 0.301 | 0.5351 | 1.07 | 1.00 | 0.331 | 0.312 | 0.3742 | 1.09 | 1.00 |
| 5  | rs1340982  | g | 229928655 | 1350 | - | T | 0.356 | 0.338 | 0.2844 | 1.08 | 1.00 | 0.350 | 0.332 | 0.4786 | 1.08 | 1.00 | 0.360 | 0.342 | 0.4117 | 1.08 | 1.00 |
| 5  | rs2487453  | i | 229929827 | 1172 | - | T | 0.329 | 0.312 | 0.3039 | 1.08 | 1.00 | 0.326 | 0.306 | 0.3960 | 1.10 | 1.00 | 0.331 | 0.317 | 0.5258 | 1.07 | 1.00 |
| 6  | rs2812385  | g | 229930625 | 798  | - | G | 0.370 | 0.377 | 0.6655 | 0.97 | 1.00 | 0.377 | 0.368 | 0.7441 | 1.04 | 1.00 | 0.363 | 0.383 | 0.3870 | 0.92 | 1.00 |
| 6  | rs9431985  | i | 229931099 | 474  | - | C | 0.198 | 0.210 | 0.3655 | 0.92 | 1.00 | 0.208 | 0.200 | 0.6837 | 1.05 | 1.00 | 0.189 | 0.218 | 0.1161 | 0.83 | 1.00 |
| 7  | rs2812388  | g | 229931999 | 900  | - | C | 0.202 | 0.213 | 0.4319 | 0.93 | 1.00 | 0.212 | 0.202 | 0.6646 | 1.06 | 1.00 | 0.193 | 0.221 | 0.1520 | 0.85 | 1.00 |
| 7  | rs4083969  | i | 229933103 | 1104 | - | G | 0.067 | 0.059 | 0.3231 | 1.15 | 1.00 | 0.060 | 0.067 | 0.5910 | 0.89 | 1.00 | 0.073 | 0.052 | 0.0712 | 1.42 | 1.00 |
| 7  | rs12029621 | g | 229934698 | 1595 | - | G | 0.170 | 0.179 | 0.4947 | 0.94 | 1.00 | 0.178 | 0.166 | 0.5581 | 1.09 | 1.00 | 0.163 | 0.188 | 0.1579 | 0.84 | 1.00 |
| 7  | rs2812395  | g | 229937002 | 2304 | - | A | 0.213 | 0.215 | 0.9303 | 0.99 | 1.00 | 0.217 | 0.205 | 0.5742 | 1.08 | 1.00 | 0.210 | 0.222 | 0.5490 | 0.93 | 1.00 |
| 7  | rs4658939  | i | 229937312 | 310  | - | T | 0.178 | 0.185 | 0.5753 | 0.95 | 1.00 | 0.186 | 0.174 | 0.5447 | 1.09 | 1.00 | 0.171 | 0.193 | 0.2014 | 0.86 | 1.00 |
| 7  | rs2793097  | i | 229938404 | 1092 | - | A | 0.212 | 0.213 | 0.9633 | 1.00 | 1.00 | 0.218 | 0.201 | 0.4263 | 1.11 | 1.00 | 0.207 | 0.221 | 0.4516 | 0.92 | 1.00 |
| 7  | rs12027635 | g | 229939821 | 1417 | - | A | 0.231 | 0.228 | 0.8411 | 1.02 | 1.00 | 0.217 | 0.242 | 0.2684 | 0.87 | 1.00 | 0.243 | 0.218 | 0.2114 | 1.15 | 1.00 |
| 7  | rs11122325 | i | 229939924 | 103  | - | A | 0.178 | 0.182 | 0.7315 | 0.97 | 1.00 | 0.186 | 0.169 | 0.3783 | 1.13 | 1.00 | 0.171 | 0.192 | 0.2218 | 0.86 | 1.00 |
| 7  | rs10864694 | i | 229940134 | 210  | - | A | 0.178 | 0.182 | 0.7315 | 0.97 | 1.00 | 0.186 | 0.169 | 0.3783 | 1.13 | 1.00 | 0.171 | 0.192 | 0.2218 | 0.86 | 1.00 |
| 7  | rs2793098  | i | 229940766 | 632  | - | G | 0.215 | 0.216 | 0.9419 | 0.99 | 1.00 | 0.219 | 0.205 | 0.5052 | 1.09 | 1.00 | 0.211 | 0.224 | 0.5015 | 0.93 | 1.00 |
| 7  | rs2793099  | i | 229941499 | 733  | - | G | 0.212 | 0.212 | 0.9961 | 1.00 | 1.00 | 0.218 | 0.201 | 0.4263 | 1.11 | 1.00 | 0.207 | 0.220 | 0.4842 | 0.92 | 1.00 |
| 7  | rs4658941  | i | 229941823 | 324  | - | T | 0.178 | 0.182 | 0.7646 | 0.97 | 1.00 | 0.186 | 0.167 | 0.3419 | 1.14 | 1.00 | 0.171 | 0.192 | 0.2218 | 0.86 | 1.00 |
| 7  | rs6659970  | i | 229942456 | 633  | - | C | 0.212 | 0.213 | 0.9633 | 1.00 | 1.00 | 0.218 | 0.202 | 0.4648 | 1.10 | 1.00 | 0.207 | 0.220 | 0.4842 | 0.92 | 1.00 |
| 7  | rs12028200 | i | 229942866 | 410  | - | A | 0.181 | 0.184 | 0.7773 | 0.97 | 1.00 | 0.188 | 0.170 | 0.3790 | 1.13 | 1.00 | 0.175 | 0.196 | 0.2579 | 0.87 | 1.00 |
| 7  | rs4658883  | i | 229943390 | 524  | - | C | 0.171 | 0.179 | 0.5187 | 0.94 | 1.00 | 0.181 | 0.164 | 0.4146 | 1.12 | 1.00 | 0.163 | 0.190 | 0.1172 | 0.83 | 1.00 |
| 7  | rs2793093  | i | 229943696 | 306  | - | A | 0.212 | 0.213 | 0.9306 | 0.99 | 1.00 | 0.218 | 0.202 | 0.4648 | 1.10 | 1.00 | 0.207 | 0.221 | 0.4516 | 0.92 | 1.00 |
| 7  | rs17816290 | i | 229944645 | 949  | - | A | 0.033 | 0.029 | 0.5239 | 1.14 | 1.00 | 0.029 | 0.033 | 0.7044 | 0.89 | 1.00 | 0.036 | 0.027 | 0.2355 | 1.37 | 1.00 |
| 7  | rs10495308 | i | 229946190 | 1545 | - | T | 0.176 | 0.179 | 0.8245 | 0.98 | 1.00 | 0.185 | 0.164 | 0.3070 | 1.15 | 1.00 | 0.168 | 0.189 | 0.2367 | 0.87 | 1.00 |
| 7  | rs10495309 | i | 229946215 | 25   | - | T | 0.176 | 0.178 | 0.8588 | 0.98 | 1.00 | 0.185 | 0.163 | 0.2750 | 1.16 | 1.00 | 0.168 | 0.189 | 0.2367 | 0.87 | 1.00 |
| 7  | rs2793092  | i | 229946963 | 748  | - | G | 0.209 | 0.208 | 0.9468 | 1.01 | 1.00 | 0.215 | 0.198 | 0.4257 | 1.11 | 1.00 | 0.205 | 0.216 | 0.5443 | 0.93 | 1.00 |
| 7  | rs12066910 | i | 229948355 | 1392 | - | C | 0.156 | 0.163 | 0.5750 | 0.95 | 1.00 | 0.168 | 0.154 | 0.4506 | 1.11 | 1.00 | 0.146 | 0.170 | 0.1525 | 0.83 | 1.00 |
| 7  | rs11580595 | i | 229949634 | 1279 | - | G | 0.155 | 0.162 | 0.5723 | 0.95 | 1.00 | 0.168 | 0.152 | 0.4086 | 1.13 | 1.00 | 0.144 | 0.170 | 0.1336 | 0.82 | 1.00 |
| 7  | rs6668920  | i | 229950066 | 432  | - | T | 0.358 | 0.350 | 0.6572 | 1.03 | 1.00 | 0.363 | 0.341 | 0.3910 | 1.10 | 1.00 | 0.353 | 0.357 | 0.8720 | 0.98 | 1.00 |
| 7  | rs10864695 | i | 229951840 | 1774 | - | G | 0.149 | 0.163 | 0.2893 | 0.90 | 1.00 | 0.161 | 0.152 | 0.6390 | 1.07 | 1.00 | 0.140 | 0.171 | 0.0663 | 0.79 | 1.00 |
| 7  | rs17748992 | g | 229959396 | 7556 | - | T | 0.086 | 0.101 | 0.1200 | 0.83 | 1.00 | 0.087 | 0.103 | 0.3110 | 0.83 | 1.00 | 0.084 | 0.101 | 0.2358 | 0.82 | 1.00 |
| 8  | rs12076286 | i | 229959795 | 399  | - | C | 0.146 | 0.159 | 0.3211 | 0.91 | 1.00 | 0.156 | 0.155 | 0.9721 | 1.01 | 1.00 | 0.139 | 0.162 | 0.1691 | 0.84 | 1.00 |
| 8  | rs12091717 | i | 229960687 | 892  | - | G | 0.136 | 0.148 | 0.3526 | 0.91 | 1.00 | 0.151 | 0.144 | 0.6920 | 1.06 | 1.00 | 0.124 | 0.150 | 0.1004 | 0.80 | 1.00 |
|    | rs2793091  | i | 229961231 | 544  | - | A | 0.256 | 0.248 | 0.6250 | 1.04 | 1.00 | 0.253 | 0.253 | 0.9979 | 1.00 | 1.00 | 0.258 | 0.245 | 0.5162 | 1.07 | 1.00 |
| 9  | rs1538979  | g | 229963491 | 2260 | - | A | 0.135 | 0.118 | 0.1553 | 1.16 | 1.00 | 0.131 | 0.127 | 0.8281 | 1.04 | 1.00 | 0.138 | 0.112 | 0.0889 | 1.27 | 0.99 |
| 9  | rs1538978  | i | 229963538 | 47   | - | A | 0.198 | 0.201 | 0.8463 | 0.98 | 1.00 | 0.197 | 0.202 | 0.8032 | 0.97 | 1.00 | 0.199 | 0.200 | 0.9689 | 1.00 | 1.00 |
| 10 | rs17749164 | g | 229963830 | 292  | - | C | 0.423 | 0.412 | 0.5257 | 1.05 | 1.00 | 0.431 | 0.399 | 0.2117 | 1.14 | 1.00 | 0.416 | 0.421 | 0.8012 | 0.98 | 1.00 |
| 10 | rs1538977  | g | 229963926 | 96   | - | C | 0.236 | 0.244 | 0.6188 | 0.96 | 1.00 | 0.233 | 0.240 | 0.7508 | 0.96 | 1.00 | 0.239 | 0.246 | 0.7127 | 0.96 | 1.00 |
| 10 | rs17816686 | g | 229964053 | 127  | - | T | 0.456 | 0.454 | 0.8845 | 1.01 | 1.00 | 0.448 | 0.460 | 0.6640 | 0.95 | 1.00 | 0.463 | 0.449 | 0.5598 | 1.06 | 1.00 |

|    |                               |   |           |      |     |   |       |       |               |      |      |       |       |               |      |      |       |       |               |      |      |
|----|-------------------------------|---|-----------|------|-----|---|-------|-------|---------------|------|------|-------|-------|---------------|------|------|-------|-------|---------------|------|------|
| 10 | rs1538976                     | i | 229964252 | 199  | -   | G | 0.204 | 0.211 | 0.6209        | 0.96 | 1.00 | 0.201 | 0.211 | 0.6640        | 0.95 | 1.00 | 0.207 | 0.212 | 0.7870        | 0.97 | 1.00 |
| 10 | rs2793086                     | i | 229966327 | 2075 | -   | G | 0.204 | 0.211 | 0.5898        | 0.95 | 1.00 | 0.200 | 0.211 | 0.6167        | 0.94 | 1.00 | 0.207 | 0.212 | 0.7870        | 0.97 | 1.00 |
| 10 | rs2793085                     | i | 229966500 | 173  | -   | C | 0.121 | 0.126 | 0.6861        | 0.96 | 1.00 | 0.128 | 0.124 | 0.8118        | 1.04 | 1.00 | 0.116 | 0.128 | 0.4438        | 0.90 | 1.00 |
| 10 | rs7529706                     | g | 229966552 | 52   | -   | C | 0.331 | 0.344 | 0.4410        | 0.94 | 1.00 | 0.333 | 0.341 | 0.7672        | 0.97 | 1.00 | 0.330 | 0.347 | 0.4449        | 0.93 | 1.00 |
| 10 | rs11122331                    | g | 229968753 | 2201 | -   | A | 0.129 | 0.114 | 0.1916        | 1.15 | 1.00 | 0.122 | 0.122 | 0.9984        | 1.00 | 1.00 | 0.135 | 0.109 | 0.0805        | 1.28 | 0.99 |
| 10 | rs3738402                     | i | 229969633 | 880  | L/L | T | 0.018 | 0.016 | 0.7021        | 1.11 | 1.00 | 0.018 | 0.012 | 0.3621        | 1.49 | 1.00 | 0.018 | 0.020 | 0.8294        | 0.93 | 1.00 |
| 10 | rs6663650                     | i | 229970036 | 403  | -   | C | 0.131 | 0.114 | 0.1343        | 1.17 | 1.00 | 0.122 | 0.120 | 0.8764        | 1.03 | 1.00 | 0.138 | 0.109 | 0.0623        | 1.30 | 1.00 |
| 10 | rs2793101                     | g | 229970901 | 865  | -   | T | 0.103 | 0.106 | 0.7616        | 0.97 | 1.00 | 0.094 | 0.109 | 0.3375        | 0.85 | 1.00 | 0.110 | 0.104 | 0.6561        | 1.07 | 1.00 |
| 10 | rs2492367                     | i | 229973212 | 2311 | I/I | T | 0.108 | 0.110 | 0.8577        | 0.98 | 1.00 | 0.104 | 0.113 | 0.5976        | 0.91 | 1.00 | 0.111 | 0.108 | 0.8183        | 1.04 | 1.00 |
|    | rs16854940                    | i | 229973470 | 258  | -   | T | 0.018 | 0.016 | 0.7021        | 1.11 | 1.00 | 0.018 | 0.012 | 0.3621        | 1.49 | 1.00 | 0.018 | 0.020 | 0.8294        | 0.93 | 1.00 |
|    | rs2812386                     | i | 229973726 | 256  | -   | T | 0.024 | 0.019 | 0.3166        | 1.27 | 1.00 | 0.018 | 0.019 | 0.8913        | 0.95 | 1.00 | 0.028 | 0.019 | 0.1581        | 1.55 | 1.00 |
| 11 | rs7534681                     | g | 229974970 | 1244 | -   | G | 0.371 | 0.363 | 0.6416        | 1.03 | 1.00 | 0.367 | 0.369 | 0.9423        | 0.99 | 1.00 | 0.373 | 0.358 | 0.4961        | 1.07 | 1.00 |
| 11 | rs17749485                    | i | 229975136 | 166  | -   | G | 0.131 | 0.115 | 0.1639        | 1.16 | 1.00 | 0.124 | 0.121 | 0.8756        | 1.03 | 1.00 | 0.138 | 0.111 | 0.0849        | 1.28 | 1.00 |
| 11 | rs12046794                    | g | 229975378 | 242  | -   | A | 0.154 | 0.139 | 0.2150        | 1.13 | 1.00 | 0.151 | 0.145 | 0.7411        | 1.05 | 1.00 | 0.157 | 0.135 | 0.1741        | 1.20 | 1.00 |
| 11 | rs12046795                    | i | 229975392 | 14   | -   | A | 0.154 | 0.138 | 0.1873        | 1.14 | 1.00 | 0.150 | 0.141 | 0.6381        | 1.07 | 1.00 | 0.158 | 0.136 | 0.1780        | 1.19 | 1.00 |
| 12 | <b>rs2812389</b>              | g | 229977634 | 2242 | -   | A | 0.419 | 0.418 | 0.9342        | 1.01 | 1.00 | 0.445 | 0.382 | <b>0.0143</b> | 1.30 | 0.62 | 0.397 | 0.444 | <b>0.0416</b> | 0.82 | 0.91 |
| 12 | <b>rs2812390</b>              | i | 229978221 | 587  | -   | C | 0.443 | 0.446 | 0.8618        | 0.99 | 1.00 | 0.468 | 0.410 | <b>0.0265</b> | 1.26 | 0.95 | 0.423 | 0.473 | <b>0.0291</b> | 0.82 | 0.95 |
| 12 | rs2812391                     | i | 229978599 | 378  | -   | T | 0.274 | 0.274 | 0.9869        | 1.00 | 1.00 | 0.263 | 0.303 | 0.0864        | 0.82 | 1.00 | 0.283 | 0.252 | 0.1333        | 1.17 | 1.00 |
| 12 | rs16854954                    | g | 229979215 | 616  | -   | C | 0.281 | 0.281 | 0.9715        | 1.00 | 1.00 | 0.266 | 0.285 | 0.4153        | 0.91 | 1.00 | 0.294 | 0.277 | 0.4338        | 1.08 | 1.00 |
| 12 | rs16854957                    | g | 229979516 | 301  | -   | A | 0.141 | 0.143 | 0.8643        | 0.98 | 1.00 | 0.147 | 0.154 | 0.7233        | 0.95 | 1.00 | 0.135 | 0.135 | 0.9581        | 1.01 | 1.00 |
| 12 | <b>rs2812392</b>              | i | 229980276 | 760  | -   | A | 0.439 | 0.445 | 0.7463        | 0.98 | 1.00 | 0.460 | 0.413 | 0.0725        | 1.21 | 1.00 | 0.423 | 0.469 | <b>0.0449</b> | 0.83 | 0.99 |
| 12 | <b>rs2812393</b> <sup>9</sup> | g | 229980296 | 20   | -   | G | 0.435 | 0.440 | 0.7542        | 0.98 | 1.00 | 0.454 | 0.407 | 0.0747        | 1.21 | 0.99 | 0.419 | 0.465 | <b>0.0489</b> | 0.83 | 0.94 |
| 13 | rs17766087                    | i | 229984500 | 4204 | -   | G | 0.149 | 0.155 | 0.6777        | 0.96 | 1.00 | 0.157 | 0.164 | 0.6985        | 0.95 | 1.00 | 0.143 | 0.147 | 0.8102        | 0.97 | 1.00 |
| 13 | <b>rs10495310</b>             | i | 229985399 | 899  | -   | C | 0.091 | 0.099 | 0.4145        | 0.91 | 1.00 | 0.076 | 0.110 | <b>0.0273</b> | 0.67 | 0.95 | 0.102 | 0.091 | 0.3921        | 1.14 | 1.00 |
| 13 | rs4658945                     | i | 229985464 | 65   | -   | C | 0.317 | 0.306 | 0.4847        | 1.05 | 1.00 | 0.324 | 0.315 | 0.7313        | 1.04 | 1.00 | 0.311 | 0.298 | 0.5435        | 1.06 | 1.00 |
| 14 | rs16854967                    | i | 229985969 | 505  | -   | G | 0.151 | 0.149 | 0.8775        | 1.02 | 1.00 | 0.138 | 0.139 | 0.9521        | 0.99 | 1.00 | 0.161 | 0.156 | 0.7694        | 1.04 | 1.00 |
| 14 | rs11122334                    | i | 229986209 | 240  | -   | T | 0.170 | 0.176 | 0.6680        | 0.96 | 1.00 | 0.174 | 0.177 | 0.8795        | 0.98 | 1.00 | 0.167 | 0.175 | 0.6542        | 0.95 | 1.00 |
| 14 | rs17817356                    | g | 229986844 | 635  | -   | A | 0.440 | 0.445 | 0.7999        | 0.98 | 1.00 | 0.455 | 0.435 | 0.4357        | 1.09 | 1.00 | 0.428 | 0.452 | 0.2991        | 0.91 | 1.00 |
| 14 | rs12754402                    | g | 229987478 | 634  | -   | T | 0.483 | 0.487 | 0.8147        | 0.98 | 1.00 | 0.500 | 0.475 | 0.3450        | 1.11 | 1.00 | 0.469 | 0.496 | 0.2460        | 0.90 | 1.00 |
| 14 | rs11576260                    | i | 229988824 | 1346 | -   | T | 0.481 | 0.484 | 0.8656        | 0.99 | 1.00 | 0.492 | 0.472 | 0.4406        | 1.08 | 1.00 | 0.473 | 0.494 | 0.3642        | 0.92 | 1.00 |
| 14 | rs17817463 <sup>9</sup>       | g | 229988905 | 81   | -   | A | 0.145 | 0.145 | 0.9623        | 1.01 | 1.00 | 0.132 | 0.133 | 0.9417        | 0.99 | 1.00 | 0.156 | 0.153 | 0.8575        | 1.02 | 1.00 |
| 14 | rs4310431                     | i | 229989182 | 277  | -   | C | 0.169 | 0.176 | 0.6335        | 0.96 | 1.00 | 0.174 | 0.177 | 0.8795        | 0.98 | 1.00 | 0.166 | 0.175 | 0.6076        | 0.94 | 1.00 |
| 14 | <b>rs12144056</b>             | i | 229989221 | 39   | -   | A | 0.101 | 0.078 | <b>0.0215</b> | 1.33 | 0.91 | 0.111 | 0.080 | <b>0.0445</b> | 1.43 | 0.99 | 0.092 | 0.076 | 0.2168        | 1.23 | 1.00 |
| 14 | rs11590192                    | i | 229989468 | 247  | -   | C | 0.482 | 0.485 | 0.8410        | 0.99 | 1.00 | 0.497 | 0.473 | 0.3517        | 1.10 | 1.00 | 0.469 | 0.495 | 0.2721        | 0.90 | 1.00 |
| 14 | rs6672139                     | i | 229989860 | 392  | -   | C | 0.251 | 0.231 | 0.1792        | 1.12 | 1.00 | 0.250 | 0.227 | 0.3010        | 1.14 | 1.00 | 0.252 | 0.235 | 0.3750        | 1.10 | 1.00 |
| 14 | rs9803690                     | g | 229989968 | 108  | -   | G | 0.415 | 0.395 | 0.2460        | 1.09 | 1.00 | 0.410 | 0.381 | 0.2534        | 1.13 | 1.00 | 0.419 | 0.406 | 0.5673        | 1.06 | 1.00 |
| 14 | rs4385690                     | i | 229990884 | 916  | -   | A | 0.251 | 0.232 | 0.1925        | 1.11 | 1.00 | 0.250 | 0.228 | 0.3308        | 1.13 | 1.00 | 0.252 | 0.235 | 0.3750        | 1.10 | 1.00 |
| 14 | rs4325116                     | g | 229991664 | 780  | -   | G | 0.393 | 0.375 | 0.3054        | 1.08 | 1.00 | 0.396 | 0.369 | 0.2945        | 1.12 | 1.00 | 0.390 | 0.380 | 0.6566        | 1.04 | 1.00 |
| 14 | rs4332347                     | i | 229992690 | 1026 | -   | G | 0.149 | 0.145 | 0.7348        | 1.03 | 1.00 | 0.135 | 0.133 | 0.9299        | 1.01 | 1.00 | 0.161 | 0.154 | 0.6779        | 1.05 | 1.00 |
| 14 | rs16854974                    | i | 229993523 | 833  | -   | G | 0.104 | 0.088 | 0.1194        | 1.20 | 1.00 | 0.115 | 0.095 | 0.2096        | 1.24 | 1.00 | 0.094 | 0.082 | 0.3621        | 1.16 | 1.00 |

|    |                         |   |           |      |     |   |       |       |               |      |      |       |       |               |      |      |       |       |        |      |      |
|----|-------------------------|---|-----------|------|-----|---|-------|-------|---------------|------|------|-------|-------|---------------|------|------|-------|-------|--------|------|------|
| 14 | rs2738888               | i | 229993677 | 154  | -   | C | 0.148 | 0.144 | 0.7773        | 1.03 | 1.00 | 0.135 | 0.133 | 0.9299        | 1.01 | 1.00 | 0.158 | 0.152 | 0.7354 | 1.04 | 1.00 |
| 14 | rs9431997               | g | 229994003 | 326  | -   | G | 0.105 | 0.087 | 0.0789        | 1.23 | 0.99 | 0.116 | 0.094 | 0.1729        | 1.27 | 1.00 | 0.096 | 0.082 | 0.2829 | 1.19 | 1.00 |
| 14 | rs12403256              | i | 229994217 | 214  | -   | A | 0.054 | 0.053 | 0.8299        | 1.03 | 1.00 | 0.063 | 0.057 | 0.6618        | 1.10 | 1.00 | 0.048 | 0.049 | 0.8686 | 0.96 | 1.00 |
| 14 | rs12130935              | i | 229995177 | 960  | -   | T | 0.104 | 0.088 | 0.1194        | 1.20 | 1.00 | 0.115 | 0.095 | 0.2096        | 1.24 | 1.00 | 0.094 | 0.082 | 0.3621 | 1.16 | 1.00 |
| 14 | rs1322784               | g | 229995558 | 381  | -   | C | 0.265 | 0.249 | 0.3115        | 1.08 | 1.00 | 0.269 | 0.255 | 0.5446        | 1.08 | 1.00 | 0.262 | 0.245 | 0.4252 | 1.09 | 1.00 |
| 14 | rs1322783 <sup>9</sup>  | g | 229995698 | 140  | -   | T | 0.147 | 0.156 | 0.4842        | 0.93 | 1.00 | 0.136 | 0.154 | 0.3356        | 0.87 | 1.00 | 0.156 | 0.157 | 0.9485 | 0.99 | 1.00 |
| 14 | rs9432000               | i | 229995948 | 250  | -   | A | 0.104 | 0.088 | 0.1194        | 1.20 | 1.00 | 0.115 | 0.095 | 0.2096        | 1.24 | 1.00 | 0.094 | 0.082 | 0.3621 | 1.16 | 1.00 |
| 14 | rs9432002               | i | 229996155 | 207  | -   | C | 0.106 | 0.088 | 0.0732        | 1.24 | 1.00 | 0.119 | 0.095 | 0.1333        | 1.29 | 1.00 | 0.095 | 0.082 | 0.3199 | 1.18 | 1.00 |
| 14 | rs1998406               | i | 229996579 | 424  | -   | G | 0.258 | 0.241 | 0.2621        | 1.09 | 1.00 | 0.260 | 0.243 | 0.4676        | 1.09 | 1.00 | 0.256 | 0.239 | 0.3968 | 1.10 | 1.00 |
| 14 | rs17817721              | i | 229998662 | 2083 | -   | C | 0.146 | 0.145 | 0.9342        | 1.01 | 1.00 | 0.135 | 0.136 | 0.9490        | 0.99 | 1.00 | 0.155 | 0.151 | 0.8432 | 1.03 | 1.00 |
| 14 | rs2738887               | i | 230000385 | 1723 | -   | C | 0.254 | 0.238 | 0.2658        | 1.09 | 1.00 | 0.258 | 0.238 | 0.3637        | 1.12 | 1.00 | 0.251 | 0.238 | 0.5000 | 1.08 | 1.00 |
| 14 | rs7514199               | i | 230001325 | 940  | -   | T | 0.254 | 0.238 | 0.2658        | 1.09 | 1.00 | 0.258 | 0.238 | 0.3637        | 1.12 | 1.00 | 0.251 | 0.238 | 0.5000 | 1.08 | 1.00 |
| 14 | rs2255340               | g | 230002773 | 1448 | -   | A | 0.255 | 0.244 | 0.4554        | 1.06 | 1.00 | 0.261 | 0.248 | 0.5840        | 1.07 | 1.00 | 0.251 | 0.241 | 0.6215 | 1.06 | 1.00 |
| 14 | rs2738864               | g | 230004103 | 1330 | -   | T | 0.255 | 0.244 | 0.4554        | 1.06 | 1.00 | 0.261 | 0.248 | 0.5840        | 1.07 | 1.00 | 0.251 | 0.241 | 0.6215 | 1.06 | 1.00 |
| 14 | rs9432010               | i | 230007460 | 3357 | -   | G | 0.106 | 0.090 | 0.1198        | 1.20 | 1.00 | 0.119 | 0.098 | 0.1848        | 1.25 | 1.00 | 0.095 | 0.084 | 0.4040 | 1.15 | 1.00 |
| 15 | <b>rs2738875</b>        | i | 230011996 | 4536 | -   | T | 0.072 | 0.090 | 0.0622        | 0.79 | 1.00 | 0.067 | 0.096 | <b>0.0380</b> | 0.67 | 0.98 | 0.076 | 0.084 | 0.5157 | 0.89 | 1.00 |
| 15 | rs1407598               | g | 230013448 | 1452 | -   | C | 0.261 | 0.250 | 0.4783        | 1.06 | 1.00 | 0.273 | 0.240 | 0.1540        | 1.19 | 1.00 | 0.251 | 0.258 | 0.7471 | 0.97 | 1.00 |
| 15 | rs4658949               | i | 230014942 | 1494 | -   | T | 0.287 | 0.295 | 0.6295        | 0.96 | 1.00 | 0.276 | 0.310 | 0.1617        | 0.85 | 1.00 | 0.296 | 0.283 | 0.5523 | 1.06 | 1.00 |
| 15 | rs967244                | i | 230015269 | 327  | -   | G | 0.138 | 0.162 | 0.0591        | 0.83 | 1.00 | 0.140 | 0.170 | 0.1194        | 0.80 | 1.00 | 0.136 | 0.155 | 0.2483 | 0.86 | 1.00 |
| 16 | rs2759346               | g | 230015444 | 175  | -   | T | 0.372 | 0.383 | 0.5280        | 0.96 | 1.00 | 0.377 | 0.385 | 0.7463        | 0.97 | 1.00 | 0.368 | 0.381 | 0.5694 | 0.95 | 1.00 |
| 16 | rs2759345               | g | 230015562 | 118  | -   | A | 0.371 | 0.368 | 0.8950        | 1.01 | 1.00 | 0.355 | 0.376 | 0.4083        | 0.91 | 1.00 | 0.383 | 0.362 | 0.3585 | 1.09 | 1.00 |
| 16 | rs17766890              | i | 230015955 | 393  | -   | T | 0.067 | 0.071 | 0.6526        | 0.94 | 1.00 | 0.071 | 0.069 | 0.9084        | 1.02 | 1.00 | 0.064 | 0.072 | 0.4745 | 0.88 | 1.00 |
|    | <b>rs2738877</b>        | i | 230016229 | 274  | -   | T | 0.261 | 0.293 | <b>0.0396</b> | 0.85 | 0.98 | 0.268 | 0.291 | 0.3344        | 0.89 | 1.00 | 0.256 | 0.295 | 0.0572 | 0.82 | 1.00 |
| 17 | rs11122342              | i | 230020001 | 3772 | -   | T | 0.257 | 0.251 | 0.6778        | 1.03 | 1.00 | 0.268 | 0.242 | 0.2512        | 1.15 | 1.00 | 0.248 | 0.257 | 0.6394 | 0.95 | 1.00 |
| 17 | rs7548597               | i | 230020052 | 51   | -   | T | 0.217 | 0.211 | 0.6991        | 1.03 | 1.00 | 0.221 | 0.204 | 0.4269        | 1.11 | 1.00 | 0.214 | 0.217 | 0.8572 | 0.98 | 1.00 |
| 17 | rs2759341               | i | 230020262 | 210  | -   | G | 0.095 | 0.114 | 0.0809        | 0.82 | 1.00 | 0.096 | 0.126 | 0.0640        | 0.73 | 1.00 | 0.094 | 0.104 | 0.4908 | 0.90 | 1.00 |
| 17 | rs2738880               | i | 230020522 | 260  | -   | G | 0.056 | 0.049 | 0.3628        | 1.15 | 1.00 | 0.056 | 0.043 | 0.2879        | 1.29 | 1.00 | 0.056 | 0.052 | 0.7600 | 1.07 | 1.00 |
| 17 | rs6672782               | i | 230020617 | 95   | -   | G | 0.151 | 0.141 | 0.4378        | 1.08 | 1.00 | 0.147 | 0.135 | 0.4857        | 1.11 | 1.00 | 0.153 | 0.146 | 0.6592 | 1.06 | 1.00 |
| 17 | rs6675281               | g | 230020724 | 107  | L/F | T | 0.153 | 0.145 | 0.5429        | 1.06 | 1.00 | 0.150 | 0.140 | 0.5914        | 1.08 | 1.00 | 0.155 | 0.149 | 0.7200 | 1.05 | 1.00 |
| 17 | rs12133766              | i | 230020768 | 44   | L/L | A | 0.067 | 0.070 | 0.7006        | 0.95 | 1.00 | 0.072 | 0.069 | 0.8275        | 1.05 | 1.00 | 0.063 | 0.071 | 0.4655 | 0.87 | 1.00 |
| 17 | rs1535530               | i | 230021050 | 282  | -   | C | 0.316 | 0.329 | 0.4530        | 0.95 | 1.00 | 0.318 | 0.336 | 0.4756        | 0.92 | 1.00 | 0.315 | 0.323 | 0.7029 | 0.96 | 1.00 |
| 18 | rs1535529               | g | 230021232 | 182  | -   | T | 0.258 | 0.247 | 0.4733        | 1.06 | 1.00 | 0.270 | 0.237 | 0.1615        | 1.19 | 1.00 | 0.249 | 0.255 | 0.7748 | 0.97 | 1.00 |
| 18 | rs2295959               | i | 230021305 | 73   | -   | T | 0.056 | 0.049 | 0.3628        | 1.15 | 1.00 | 0.056 | 0.043 | 0.2879        | 1.29 | 1.00 | 0.056 | 0.052 | 0.7600 | 1.07 | 1.00 |
| 18 | rs11588937              | i | 230021495 | 190  | -   | T | 0.303 | 0.306 | 0.8761        | 0.99 | 1.00 | 0.294 | 0.314 | 0.4208        | 0.91 | 1.00 | 0.310 | 0.299 | 0.6126 | 1.05 | 1.00 |
| 18 | rs2759340               | g | 230021977 | 482  | -   | C | 0.444 | 0.448 | 0.8001        | 0.98 | 1.00 | 0.444 | 0.453 | 0.7250        | 0.96 | 1.00 | 0.443 | 0.444 | 0.9721 | 1.00 | 1.00 |
| 18 | rs2759339               | i | 230022284 | 307  | -   | T | 0.056 | 0.049 | 0.3628        | 1.15 | 1.00 | 0.056 | 0.043 | 0.2879        | 1.29 | 1.00 | 0.056 | 0.052 | 0.7600 | 1.07 | 1.00 |
| 18 | rs2759338               | i | 230022349 | 65   | -   | T | 0.056 | 0.049 | 0.3628        | 1.15 | 1.00 | 0.056 | 0.043 | 0.2879        | 1.29 | 1.00 | 0.056 | 0.052 | 0.7600 | 1.07 | 1.00 |
| 18 | rs12135059 <sup>9</sup> | g | 230022529 | 180  | -   | A | 0.285 | 0.278 | 0.6689        | 1.03 | 1.00 | 0.280 | 0.277 | 0.8956        | 1.02 | 1.00 | 0.289 | 0.280 | 0.6410 | 1.05 | 1.00 |
| 18 | rs11122343              | i | 230022709 | 180  | -   | A | 0.411 | 0.415 | 0.7937        | 0.98 | 1.00 | 0.422 | 0.410 | 0.6452        | 1.05 | 1.00 | 0.401 | 0.419 | 0.4422 | 0.93 | 1.00 |
| 18 | rs12143549 <sup>9</sup> | g | 230022991 | 282  | -   | T | 0.285 | 0.278 | 0.6689        | 1.03 | 1.00 | 0.280 | 0.277 | 0.8956        | 1.02 | 1.00 | 0.289 | 0.280 | 0.6410 | 1.05 | 1.00 |

|    |                         |   |           |      |   |   |       |       |        |      |      |       |       |               |      |      |       |       |        |      |      |
|----|-------------------------|---|-----------|------|---|---|-------|-------|--------|------|------|-------|-------|---------------|------|------|-------|-------|--------|------|------|
| 18 | rs16855090              | i | 230023682 | 691  | - | A | 0.056 | 0.048 | 0.3228 | 1.17 | 1.00 | 0.056 | 0.043 | 0.2879        | 1.29 | 1.00 | 0.056 | 0.051 | 0.6853 | 1.09 | 1.00 |
| 18 | rs16855093              | i | 230023959 | 277  | - | T | 0.056 | 0.048 | 0.3228 | 1.17 | 1.00 | 0.056 | 0.043 | 0.2879        | 1.29 | 1.00 | 0.056 | 0.051 | 0.6853 | 1.09 | 1.00 |
| 18 | rs16855096              | i | 230024901 | 942  | - | T | 0.056 | 0.048 | 0.3228 | 1.17 | 1.00 | 0.056 | 0.043 | 0.2879        | 1.29 | 1.00 | 0.056 | 0.051 | 0.6853 | 1.09 | 1.00 |
| 18 | rs7528672               | i | 230025683 | 782  | - | T | 0.284 | 0.278 | 0.6884 | 1.03 | 1.00 | 0.279 | 0.276 | 0.8865        | 1.02 | 1.00 | 0.289 | 0.280 | 0.6749 | 1.04 | 1.00 |
| 18 | rs2759330               | g | 230026777 | 1094 | - | T | 0.255 | 0.249 | 0.6949 | 1.03 | 1.00 | 0.264 | 0.239 | 0.2831        | 1.14 | 1.00 | 0.247 | 0.256 | 0.6719 | 0.96 | 1.00 |
| 18 | rs16855108              | i | 230026800 | 23   | - | C | 0.153 | 0.146 | 0.5539 | 1.06 | 1.00 | 0.149 | 0.145 | 0.8618        | 1.03 | 1.00 | 0.157 | 0.146 | 0.5199 | 1.09 | 1.00 |
| 18 | rs2759329               | g | 230026975 | 175  | - | C | 0.388 | 0.402 | 0.4193 | 0.94 | 1.00 | 0.385 | 0.410 | 0.3366        | 0.90 | 1.00 | 0.390 | 0.395 | 0.8134 | 0.98 | 1.00 |
| 18 | rs7532658               | i | 230027524 | 549  | - | T | 0.031 | 0.032 | 0.9519 | 0.99 | 1.00 | 0.025 | 0.024 | 0.9468        | 1.02 | 1.00 | 0.036 | 0.037 | 0.9387 | 0.98 | 1.00 |
| 18 | rs1000731               | g | 230030114 | 2590 | - | A | 0.257 | 0.249 | 0.5778 | 1.05 | 1.00 | 0.269 | 0.240 | 0.2024        | 1.17 | 1.00 | 0.248 | 0.256 | 0.6936 | 0.96 | 1.00 |
| 18 | rs1000730               | i | 230030224 | 110  | - | T | 0.359 | 0.352 | 0.6524 | 1.03 | 1.00 | 0.351 | 0.359 | 0.7708        | 0.97 | 1.00 | 0.366 | 0.347 | 0.3887 | 1.09 | 1.00 |
| 18 | rs6667141               | i | 230031254 | 1030 | - | T | 0.284 | 0.279 | 0.7748 | 1.02 | 1.00 | 0.279 | 0.276 | 0.8865        | 1.02 | 1.00 | 0.288 | 0.282 | 0.7894 | 1.03 | 1.00 |
| 18 | rs12729026              | i | 230032588 | 1334 | - | A | 0.284 | 0.279 | 0.7445 | 1.03 | 1.00 | 0.279 | 0.276 | 0.8865        | 1.02 | 1.00 | 0.289 | 0.282 | 0.7482 | 1.03 | 1.00 |
| 18 | rs6674099               | i | 230033485 | 897  | - | G | 0.439 | 0.444 | 0.7721 | 0.98 | 1.00 | 0.438 | 0.447 | 0.7149        | 0.96 | 1.00 | 0.441 | 0.442 | 0.9490 | 0.99 | 1.00 |
| 18 | rs11589087              | i | 230036900 | 3415 | - | T | 0.304 | 0.304 | 0.9963 | 1.00 | 1.00 | 0.294 | 0.315 | 0.3893        | 0.91 | 1.00 | 0.313 | 0.296 | 0.4490 | 1.08 | 1.00 |
| 18 | rs12406166              | i | 230037241 | 341  | - | G | 0.340 | 0.323 | 0.2879 | 1.08 | 1.00 | 0.336 | 0.310 | 0.2827        | 1.13 | 1.00 | 0.343 | 0.332 | 0.6210 | 1.05 | 1.00 |
| 18 | rs12744978 <sup>9</sup> | g | 230038154 | 913  | - | G | 0.287 | 0.281 | 0.7194 | 1.03 | 1.00 | 0.283 | 0.273 | 0.6705        | 1.05 | 1.00 | 0.291 | 0.288 | 0.8979 | 1.01 | 1.00 |
| 18 | rs12132978              | i | 230038608 | 454  | - | C | 0.286 | 0.280 | 0.7112 | 1.03 | 1.00 | 0.282 | 0.270 | 0.6217        | 1.06 | 1.00 | 0.290 | 0.288 | 0.9355 | 1.01 | 1.00 |
| 18 | rs11122347 <sup>9</sup> | g | 230038649 | 41   | - | G | 0.343 | 0.329 | 0.3955 | 1.07 | 1.00 | 0.339 | 0.317 | 0.3798        | 1.10 | 1.00 | 0.346 | 0.338 | 0.6989 | 1.04 | 1.00 |
| 18 | rs7551537               | i | 230038840 | 191  | - | T | 0.353 | 0.367 | 0.4029 | 0.94 | 1.00 | 0.367 | 0.370 | 0.9087        | 0.99 | 1.00 | 0.342 | 0.365 | 0.2976 | 0.90 | 1.00 |
| 18 | rs17768115              | g | 230039434 | 594  | - | G | 0.221 | 0.211 | 0.5035 | 1.06 | 1.00 | 0.212 | 0.202 | 0.6646        | 1.06 | 1.00 | 0.228 | 0.217 | 0.5856 | 1.06 | 1.00 |
| 18 | rs16841582 <sup>9</sup> | g | 230040257 | 823  | - | C | 0.356 | 0.369 | 0.4322 | 0.94 | 1.00 | 0.369 | 0.373 | 0.8794        | 0.98 | 1.00 | 0.345 | 0.366 | 0.3429 | 0.91 | 1.00 |
| 18 | rs6700577               | g | 230040500 | 243  | - | A | 0.096 | 0.115 | 0.0802 | 0.82 | 0.99 | 0.097 | 0.129 | 0.0517        | 0.72 | 0.96 | 0.096 | 0.105 | 0.5368 | 0.91 | 1.00 |
| 19 | rs6663190               | i | 230040545 | 45   | - | G | 0.386 | 0.396 | 0.5512 | 0.96 | 1.00 | 0.399 | 0.400 | 0.9737        | 1.00 | 1.00 | 0.376 | 0.394 | 0.4294 | 0.93 | 1.00 |
| 19 | rs12135837              | i | 230040734 | 189  | - | C | 0.064 | 0.070 | 0.5429 | 0.92 | 1.00 | 0.069 | 0.068 | 0.9093        | 1.02 | 1.00 | 0.060 | 0.071 | 0.3512 | 0.84 | 1.00 |
| 19 | rs12087793              | i | 230041014 | 280  | - | A | 0.241 | 0.244 | 0.8461 | 0.98 | 1.00 | 0.239 | 0.242 | 0.8949        | 0.98 | 1.00 | 0.243 | 0.246 | 0.8925 | 0.99 | 1.00 |
| 20 | rs12139080              | i | 230044175 | 3161 | - | G | 0.066 | 0.080 | 0.1074 | 0.81 | 1.00 | 0.065 | 0.088 | 0.0991        | 0.72 | 1.00 | 0.066 | 0.074 | 0.4922 | 0.88 | 1.00 |
| 20 | rs12120638              | i | 230045142 | 967  | - | G | 0.051 | 0.058 | 0.3962 | 0.88 | 1.00 | 0.053 | 0.057 | 0.7196        | 0.92 | 1.00 | 0.050 | 0.059 | 0.4134 | 0.84 | 1.00 |
| 20 | rs4658954               | i | 230045980 | 838  | - | G | 0.371 | 0.369 | 0.9141 | 1.01 | 1.00 | 0.372 | 0.353 | 0.4518        | 1.09 | 1.00 | 0.371 | 0.382 | 0.6183 | 0.95 | 1.00 |
| 21 | rs2146376               | i | 230046965 | 985  | - | A | 0.183 | 0.198 | 0.2800 | 0.91 | 1.00 | 0.193 | 0.227 | 0.1130        | 0.82 | 1.00 | 0.175 | 0.176 | 0.9583 | 0.99 | 1.00 |
| 21 | rs12731570              | i | 230048561 | 1596 | - | A | 0.184 | 0.199 | 0.2819 | 0.91 | 1.00 | 0.193 | 0.228 | 0.0997        | 0.81 | 1.00 | 0.176 | 0.176 | 0.9905 | 1.00 | 1.00 |
| 21 | rs12735632              | i | 230048639 | 78   | - | T | 0.184 | 0.199 | 0.3031 | 0.91 | 1.00 | 0.194 | 0.228 | 0.1142        | 0.82 | 1.00 | 0.176 | 0.176 | 0.9905 | 1.00 | 1.00 |
| 21 | <b>rs11588799</b>       | i | 230048894 | 255  | - | A | 0.393 | 0.368 | 0.1319 | 1.11 | 1.00 | 0.393 | 0.341 | <b>0.0395</b> | 1.25 | 0.99 | 0.393 | 0.388 | 0.8146 | 1.02 | 1.00 |
| 21 | rs9432013               | i | 230049220 | 326  | - | C | 0.058 | 0.052 | 0.4956 | 1.11 | 1.00 | 0.057 | 0.050 | 0.5718        | 1.14 | 1.00 | 0.058 | 0.054 | 0.6760 | 1.09 | 1.00 |
| 21 | rs12139880              | g | 230050383 | 1163 | - | C | 0.256 | 0.264 | 0.6177 | 0.96 | 1.00 | 0.257 | 0.270 | 0.5942        | 0.94 | 1.00 | 0.255 | 0.260 | 0.8377 | 0.98 | 1.00 |
| 21 | rs12139117              | i | 230050446 | 63   | - | G | 0.263 | 0.269 | 0.6849 | 0.97 | 1.00 | 0.267 | 0.273 | 0.7823        | 0.97 | 1.00 | 0.259 | 0.265 | 0.7567 | 0.97 | 1.00 |
| 21 | rs17819668              | i | 230051029 | 583  | - | A | 0.354 | 0.345 | 0.5914 | 1.04 | 1.00 | 0.353 | 0.326 | 0.2822        | 1.13 | 1.00 | 0.355 | 0.359 | 0.8397 | 0.98 | 1.00 |
| 21 | rs11122348 <sup>9</sup> | g | 230051140 | 111  | - | T | 0.184 | 0.194 | 0.4424 | 0.93 | 1.00 | 0.196 | 0.220 | 0.2599        | 0.86 | 1.00 | 0.174 | 0.175 | 0.9400 | 0.99 | 1.00 |
| 21 | rs16855239              | i | 230051264 | 124  | - | T | 0.182 | 0.194 | 0.3580 | 0.92 | 1.00 | 0.194 | 0.220 | 0.2272        | 0.86 | 1.00 | 0.172 | 0.175 | 0.8511 | 0.98 | 1.00 |
| 21 | rs12090070              | g | 230051472 | 208  | - | A | 0.137 | 0.133 | 0.7266 | 1.04 | 1.00 | 0.119 | 0.127 | 0.6293        | 0.93 | 1.00 | 0.152 | 0.137 | 0.3620 | 1.13 | 1.00 |
| 21 | rs4575071               | i | 230052154 | 682  | - | A | 0.353 | 0.332 | 0.2134 | 1.10 | 1.00 | 0.351 | 0.313 | 0.1151        | 1.19 | 1.00 | 0.353 | 0.347 | 0.7627 | 1.03 | 1.00 |

|    |            |   |           |      |   |   |       |       |               |      |      |       |       |               |      |             |       |       |               |      |      |
|----|------------|---|-----------|------|---|---|-------|-------|---------------|------|------|-------|-------|---------------|------|-------------|-------|-------|---------------|------|------|
| 21 | rs4459095  | i | 230052203 | 49   | - | A | 0.136 | 0.132 | 0.7403        | 1.03 | 1.00 | 0.119 | 0.128 | 0.6316        | 0.93 | 1.00        | 0.150 | 0.136 | 0.3828        | 1.12 | 1.00 |
| 21 | rs6677522  | i | 230052256 | 53   | - | T | 0.136 | 0.132 | 0.7403        | 1.03 | 1.00 | 0.119 | 0.128 | 0.6316        | 0.93 | 1.00        | 0.150 | 0.136 | 0.3828        | 1.12 | 1.00 |
| 21 | rs16855254 | i | 230052287 | 31   | - | C | 0.018 | 0.020 | 0.6101        | 0.88 | 1.00 | 0.017 | 0.023 | 0.3799        | 0.72 | 1.00        | 0.018 | 0.017 | 0.9105        | 1.04 | 1.00 |
| 21 | rs6677638  | g | 230052351 | 64   | - | T | 0.138 | 0.133 | 0.6875        | 1.04 | 1.00 | 0.120 | 0.127 | 0.6884        | 0.94 | 1.00        | 0.152 | 0.137 | 0.3620        | 1.13 | 1.00 |
| 21 | rs12093976 | i | 230053156 | 805  | - | A | 0.018 | 0.020 | 0.6101        | 0.88 | 1.00 | 0.017 | 0.023 | 0.3799        | 0.72 | 1.00        | 0.018 | 0.017 | 0.9105        | 1.04 | 1.00 |
| 21 | rs9432014  | i | 230053752 | 596  | - | A | 0.136 | 0.132 | 0.7403        | 1.03 | 1.00 | 0.119 | 0.128 | 0.6316        | 0.93 | 1.00        | 0.150 | 0.136 | 0.3828        | 1.12 | 1.00 |
| 21 | rs11580219 | i | 230053772 | 20   | - | C | 0.381 | 0.396 | 0.3532        | 0.94 | 1.00 | 0.376 | 0.412 | 0.1682        | 0.86 | 1.00        | 0.384 | 0.385 | 0.9759        | 1.00 | 1.00 |
| 21 | rs4658958  | i | 230054516 | 744  | - | G | 0.182 | 0.194 | 0.3580        | 0.92 | 1.00 | 0.194 | 0.220 | 0.2272        | 0.86 | 1.00        | 0.172 | 0.175 | 0.8511        | 0.98 | 1.00 |
| 21 | rs12751370 | g | 230055037 | 521  | - | G | 0.356 | 0.335 | 0.2019        | 1.10 | 1.00 | 0.355 | 0.317 | 0.1261        | 1.19 | 1.00        | 0.357 | 0.348 | 0.6987        | 1.04 | 1.00 |
| 21 | rs9431696  | i | 230055317 | 280  | - | A | 0.018 | 0.020 | 0.7080        | 0.91 | 1.00 | 0.018 | 0.023 | 0.4983        | 0.78 | 1.00        | 0.018 | 0.017 | 0.9105        | 1.04 | 1.00 |
| 21 | rs2146375  | i | 230055375 | 58   | - | T | 0.136 | 0.132 | 0.7403        | 1.03 | 1.00 | 0.119 | 0.128 | 0.6316        | 0.93 | 1.00        | 0.150 | 0.136 | 0.3828        | 1.12 | 1.00 |
| 21 | rs9431699  | i | 230055477 | 102  | - | T | 0.018 | 0.020 | 0.7080        | 0.91 | 1.00 | 0.018 | 0.023 | 0.4983        | 0.78 | 1.00        | 0.018 | 0.017 | 0.9105        | 1.04 | 1.00 |
| 21 | rs11588004 | i | 230055819 | 342  | - | G | 0.353 | 0.332 | 0.1999        | 1.10 | 1.00 | 0.353 | 0.313 | 0.1029        | 1.20 | 1.00        | 0.353 | 0.347 | 0.7627        | 1.03 | 1.00 |
| 21 | rs12140495 | i | 230055927 | 108  | - | A | 0.181 | 0.194 | 0.3341        | 0.92 | 1.00 | 0.194 | 0.220 | 0.2272        | 0.86 | 1.00        | 0.171 | 0.175 | 0.8006        | 0.97 | 1.00 |
| 21 | rs1079344  | i | 230058720 | 2793 | - | T | 0.353 | 0.332 | 0.1999        | 1.10 | 1.00 | 0.353 | 0.313 | 0.1029        | 1.20 | 1.00        | 0.353 | 0.347 | 0.7627        | 1.03 | 1.00 |
| 21 | rs4546903  | i | 230058747 | 27   | - | A | 0.181 | 0.194 | 0.3341        | 0.92 | 1.00 | 0.194 | 0.220 | 0.2272        | 0.86 | 1.00        | 0.171 | 0.175 | 0.8006        | 0.97 | 1.00 |
| 21 | rs748583   | i | 230059461 | 714  | - | G | 0.358 | 0.337 | 0.2080        | 1.10 | 1.00 | 0.357 | 0.315 | 0.0919        | 1.21 | 1.00        | 0.358 | 0.353 | 0.8198        | 1.02 | 1.00 |
| 21 | rs12730369 | i | 230060361 | 900  | - | T | 0.181 | 0.194 | 0.3559        | 0.92 | 1.00 | 0.194 | 0.220 | 0.2272        | 0.86 | 1.00        | 0.171 | 0.174 | 0.8459        | 0.98 | 1.00 |
| 21 | rs734551   | g | 230061056 | 695  | - | T | 0.466 | 0.479 | 0.4831        | 0.95 | 1.00 | 0.451 | 0.472 | 0.4178        | 0.92 | 1.00        | 0.479 | 0.483 | 0.8552        | 0.98 | 1.00 |
| 21 | rs7549664  | i | 230063332 | 2276 | - | T | 0.461 | 0.467 | 0.7042        | 0.97 | 1.00 | 0.449 | 0.463 | 0.5733        | 0.94 | 1.00        | 0.471 | 0.470 | 0.9900        | 1.00 | 1.00 |
| 21 | rs12757857 | i | 230065486 | 2154 | - | C | 0.461 | 0.467 | 0.7042        | 0.97 | 1.00 | 0.449 | 0.462 | 0.6092        | 0.95 | 1.00        | 0.471 | 0.471 | 0.9746        | 1.00 | 1.00 |
| 21 | rs3081     | i | 230068955 | 3469 | - | G | 0.039 | 0.040 | 0.8806        | 0.97 | 1.00 | 0.033 | 0.041 | 0.4534        | 0.81 | 1.00        | 0.044 | 0.040 | 0.6536        | 1.11 | 1.00 |
| 21 | rs1407601  | i | 230070035 | 1080 | - | G | 0.134 | 0.138 | 0.7877        | 0.97 | 1.00 | 0.118 | 0.133 | 0.3850        | 0.87 | 1.00        | 0.148 | 0.141 | 0.6782        | 1.06 | 1.00 |
| 21 | rs1407600  | i | 230070174 | 139  | - | G | 0.127 | 0.131 | 0.7142        | 0.96 | 1.00 | 0.113 | 0.125 | 0.4611        | 0.89 | 1.00        | 0.139 | 0.136 | 0.8595        | 1.02 | 1.00 |
| 21 | rs9432017  | i | 230070591 | 417  | - | A | 0.117 | 0.122 | 0.6637        | 0.95 | 1.00 | 0.100 | 0.111 | 0.4790        | 0.89 | 1.00        | 0.131 | 0.130 | 0.9464        | 1.01 | 1.00 |
| 22 | rs9432024  | i | 230073842 | 3251 | - | C | 0.336 | 0.360 | 0.1499        | 0.90 | 1.00 | 0.313 | 0.397 | <b>0.0008</b> | 0.69 | 0.12        | 0.355 | 0.331 | 0.2919        | 1.11 | 1.00 |
| 22 | rs1015101  | g | 230074317 | 475  | - | G | 0.425 | 0.393 | 0.0594        | 1.14 | 0.97 | 0.458 | 0.363 | <b>0.0002</b> | 1.48 | <b>0.02</b> | 0.398 | 0.415 | 0.4608        | 0.93 | 1.00 |
| 22 | rs9432025  | i | 230074347 | 30   | - | C | 0.446 | 0.482 | <b>0.0339</b> | 0.86 | 0.97 | 0.436 | 0.514 | <b>0.0031</b> | 0.73 | 0.36        | 0.453 | 0.459 | 0.8145        | 0.98 | 1.00 |
| 22 | rs9431706  | i | 230074383 | 36   | - | A | 0.446 | 0.482 | <b>0.0339</b> | 0.86 | 0.97 | 0.436 | 0.514 | <b>0.0031</b> | 0.73 | 0.36        | 0.453 | 0.459 | 0.8145        | 0.98 | 1.00 |
| 22 | rs7553949  | i | 230074415 | 32   | - | G | 0.446 | 0.482 | <b>0.0339</b> | 0.86 | 0.97 | 0.436 | 0.514 | <b>0.0031</b> | 0.73 | 0.36        | 0.453 | 0.459 | 0.8145        | 0.98 | 1.00 |
| 22 | rs1475148  | i | 230074824 | 409  | - | A | 0.093 | 0.111 | 0.0845        | 0.82 | 1.00 | 0.103 | 0.103 | 0.9758        | 0.99 | 1.00        | 0.084 | 0.116 | <b>0.0218</b> | 0.70 | 0.91 |
| 22 | rs6668845  | i | 230075170 | 346  | - | G | 0.093 | 0.111 | 0.0845        | 0.82 | 1.00 | 0.103 | 0.103 | 0.9758        | 0.99 | 1.00        | 0.084 | 0.116 | <b>0.0218</b> | 0.70 | 0.91 |
| 22 | rs6671423  | i | 230075280 | 110  | - | C | 0.093 | 0.111 | 0.0845        | 0.82 | 1.00 | 0.103 | 0.103 | 0.9758        | 0.99 | 1.00        | 0.084 | 0.116 | <b>0.0218</b> | 0.70 | 0.91 |
| 22 | rs6541289  | i | 230075385 | 105  | - | A | 0.093 | 0.111 | 0.0845        | 0.82 | 1.00 | 0.103 | 0.103 | 0.9758        | 0.99 | 1.00        | 0.084 | 0.116 | <b>0.0218</b> | 0.70 | 0.91 |
| 22 | rs7523846  | i | 230075483 | 98   | - | G | 0.093 | 0.111 | 0.0845        | 0.82 | 1.00 | 0.103 | 0.103 | 0.9758        | 0.99 | 1.00        | 0.084 | 0.116 | <b>0.0218</b> | 0.70 | 0.91 |
| 22 | rs7512173  | i | 230075529 | 46   | - | T | 0.093 | 0.111 | 0.0845        | 0.82 | 1.00 | 0.103 | 0.103 | 0.9758        | 0.99 | 1.00        | 0.084 | 0.116 | <b>0.0218</b> | 0.70 | 0.91 |
| 22 | rs9432028  | i | 230075733 | 204  | - | A | 0.353 | 0.371 | 0.2636        | 0.92 | 1.00 | 0.333 | 0.409 | <b>0.0028</b> | 0.72 | 0.34        | 0.368 | 0.343 | 0.2504        | 1.12 | 1.00 |
| 22 | rs9431708  | i | 230076025 | 292  | - | G | 0.445 | 0.482 | <b>0.0310</b> | 0.86 | 0.96 | 0.436 | 0.514 | <b>0.0031</b> | 0.73 | 0.36        | 0.452 | 0.459 | 0.7766        | 0.97 | 1.00 |
| 22 | rs7418900  | i | 230076171 | 146  | - | G | 0.093 | 0.111 | 0.0845        | 0.82 | 1.00 | 0.103 | 0.103 | 0.9758        | 0.99 | 1.00        | 0.084 | 0.116 | <b>0.0218</b> | 0.70 | 0.91 |
| 22 | rs999710   | g | 230077566 | 1395 | - | T | 0.425 | 0.392 | 0.0506        | 1.15 | 0.95 | 0.458 | 0.363 | <b>0.0002</b> | 1.48 | <b>0.02</b> | 0.398 | 0.413 | 0.5171        | 0.94 | 1.00 |

|    |            |   |           |      |   |   |       |       |               |      |      |       |       |               |      |             |       |       |               |      |      |
|----|------------|---|-----------|------|---|---|-------|-------|---------------|------|------|-------|-------|---------------|------|-------------|-------|-------|---------------|------|------|
| 22 | rs7549204  | i | 230077793 | 227  | - | A | 0.198 | 0.216 | 0.2025        | 0.90 | 1.00 | 0.186 | 0.228 | <b>0.0473</b> | 0.77 | 0.99        | 0.207 | 0.206 | 0.9552        | 1.01 | 1.00 |
| 22 | rs999708   | i | 230078214 | 421  | - | G | 0.445 | 0.482 | <b>0.0310</b> | 0.86 | 0.96 | 0.436 | 0.514 | <b>0.0031</b> | 0.73 | 0.36        | 0.452 | 0.459 | 0.7766        | 0.97 | 1.00 |
| 22 | rs1009587  | i | 230078572 | 358  | - | A | 0.427 | 0.394 | 0.0549        | 1.15 | 1.00 | 0.457 | 0.364 | <b>0.0003</b> | 1.47 | 0.05        | 0.402 | 0.417 | 0.5294        | 0.94 | 1.00 |
| 22 | rs7521943  | i | 230079315 | 743  | - | C | 0.093 | 0.111 | 0.0845        | 0.82 | 1.00 | 0.103 | 0.103 | 0.9758        | 0.99 | 1.00        | 0.084 | 0.116 | <b>0.0218</b> | 0.70 | 0.91 |
| 22 | rs7522155  | i | 230079526 | 211  | - | C | 0.093 | 0.111 | 0.0845        | 0.82 | 1.00 | 0.103 | 0.103 | 0.9758        | 0.99 | 1.00        | 0.084 | 0.116 | <b>0.0218</b> | 0.70 | 0.91 |
| 22 | rs7519741  | i | 230079593 | 67   | - | A | 0.128 | 0.123 | 0.6534        | 1.05 | 1.00 | 0.107 | 0.121 | 0.4014        | 0.87 | 1.00        | 0.146 | 0.125 | 0.1865        | 1.20 | 1.00 |
| 22 | rs11122355 | g | 230079816 | 223  | - | T | 0.129 | 0.124 | 0.6779        | 1.05 | 1.00 | 0.106 | 0.122 | 0.3577        | 0.86 | 1.00        | 0.147 | 0.125 | 0.1751        | 1.20 | 1.00 |
| 22 | rs9431711  | g | 230080135 | 319  | - | A | 0.196 | 0.216 | 0.1549        | 0.88 | 1.00 | 0.183 | 0.230 | <b>0.0268</b> | 0.75 | 0.83        | 0.207 | 0.206 | 0.9507        | 1.01 | 1.00 |
| 22 | rs9432040  | i | 230080739 | 604  | - | G | 0.445 | 0.482 | <b>0.0310</b> | 0.86 | 0.96 | 0.436 | 0.514 | <b>0.0031</b> | 0.73 | 0.36        | 0.452 | 0.459 | 0.7766        | 0.97 | 1.00 |
| 22 | rs12746755 | i | 230080936 | 197  | - | A | 0.017 | 0.013 | 0.3419        | 1.32 | 1.00 | 0.021 | 0.015 | 0.3964        | 1.40 | 1.00        | 0.014 | 0.011 | 0.6526        | 1.21 | 1.00 |
| 22 | rs7535913  | i | 230081033 | 97   | - | T | 0.353 | 0.371 | 0.2636        | 0.92 | 1.00 | 0.333 | 0.409 | <b>0.0028</b> | 0.72 | 0.34        | 0.368 | 0.343 | 0.2504        | 1.12 | 1.00 |
| 22 | rs2356606  | i | 230081663 | 630  | - | G | 0.198 | 0.216 | 0.1884        | 0.89 | 1.00 | 0.186 | 0.230 | <b>0.0409</b> | 0.77 | 0.99        | 0.207 | 0.206 | 0.9552        | 1.01 | 1.00 |
| 22 | rs7534369  | i | 230082857 | 1194 | - | A | 0.353 | 0.371 | 0.2636        | 0.92 | 1.00 | 0.333 | 0.409 | <b>0.0028</b> | 0.72 | 0.34        | 0.368 | 0.343 | 0.2504        | 1.12 | 1.00 |
| 22 | rs12740724 | i | 230083249 | 392  | - | G | 0.353 | 0.371 | 0.2636        | 0.92 | 1.00 | 0.333 | 0.409 | <b>0.0028</b> | 0.72 | 0.34        | 0.368 | 0.343 | 0.2504        | 1.12 | 1.00 |
| 22 | rs11122357 | i | 230083676 | 427  | - | A | 0.353 | 0.371 | 0.2636        | 0.92 | 1.00 | 0.333 | 0.409 | <b>0.0028</b> | 0.72 | 0.34        | 0.368 | 0.343 | 0.2504        | 1.12 | 1.00 |
| 22 | rs2181310  | i | 230084039 | 363  | - | T | 0.128 | 0.123 | 0.6534        | 1.05 | 1.00 | 0.107 | 0.121 | 0.4014        | 0.87 | 1.00        | 0.146 | 0.125 | 0.1865        | 1.20 | 1.00 |
| 22 | rs10864698 | i | 230084512 | 473  | - | A | 0.093 | 0.111 | 0.0845        | 0.82 | 1.00 | 0.103 | 0.103 | 0.9758        | 0.99 | 1.00        | 0.084 | 0.116 | <b>0.0218</b> | 0.70 | 0.91 |
| 22 | rs17820909 | g | 230084608 | 96   | - | G | 0.088 | 0.085 | 0.7779        | 1.04 | 1.00 | 0.085 | 0.094 | 0.5621        | 0.90 | 1.00        | 0.090 | 0.079 | 0.3721        | 1.16 | 1.00 |
| 22 | rs4658889  | i | 230086433 | 1825 | - | A | 0.128 | 0.123 | 0.6534        | 1.05 | 1.00 | 0.107 | 0.121 | 0.4014        | 0.87 | 1.00        | 0.146 | 0.125 | 0.1865        | 1.20 | 1.00 |
| 22 | rs11122362 | g | 230086482 | 49   | - | T | 0.094 | 0.111 | 0.1008        | 0.83 | 1.00 | 0.104 | 0.105 | 0.9344        | 0.99 | 1.00        | 0.086 | 0.116 | <b>0.0323</b> | 0.71 | 0.85 |
| 22 | rs9431714  | i | 230087871 | 1389 | - | A | 0.353 | 0.371 | 0.2636        | 0.92 | 1.00 | 0.333 | 0.409 | <b>0.0028</b> | 0.72 | 0.34        | 0.368 | 0.343 | 0.2504        | 1.12 | 1.00 |
| 22 | rs1322786  | i | 230089729 | 1858 | - | T | 0.128 | 0.123 | 0.6534        | 1.05 | 1.00 | 0.107 | 0.121 | 0.4014        | 0.87 | 1.00        | 0.146 | 0.125 | 0.1865        | 1.20 | 1.00 |
| 22 | rs1322785  | i | 230089824 | 95   | - | C | 0.128 | 0.123 | 0.6534        | 1.05 | 1.00 | 0.107 | 0.121 | 0.4014        | 0.87 | 1.00        | 0.146 | 0.125 | 0.1865        | 1.20 | 1.00 |
| 22 | rs4658890  | g | 230090704 | 880  | - | G | 0.477 | 0.493 | 0.3688        | 0.94 | 1.00 | 0.441 | 0.529 | <b>0.0008</b> | 0.70 | 0.07        | 0.507 | 0.466 | 0.0790        | 1.18 | 0.99 |
| 22 | rs1040944  | i | 230090728 | 24   | - | G | 0.128 | 0.123 | 0.6534        | 1.05 | 1.00 | 0.107 | 0.121 | 0.4014        | 0.87 | 1.00        | 0.146 | 0.125 | 0.1865        | 1.20 | 1.00 |
| 22 | rs4333837  | g | 230091773 | 1045 | - | G | 0.390 | 0.360 | 0.0694        | 1.14 | 0.98 | 0.417 | 0.330 | <b>0.0006</b> | 1.46 | <b>0.05</b> | 0.368 | 0.382 | 0.5389        | 0.94 | 1.00 |
| 22 | rs9659649  | i | 230094131 | 2358 | - | T | 0.305 | 0.316 | 0.4883        | 0.95 | 1.00 | 0.285 | 0.332 | 0.0532        | 0.80 | 1.00        | 0.322 | 0.305 | 0.4289        | 1.08 | 1.00 |
| 22 | rs1407599  | i | 230094534 | 403  | - | T | 0.386 | 0.355 | 0.0612        | 1.14 | 1.00 | 0.415 | 0.327 | <b>0.0005</b> | 1.46 | 0.08        | 0.363 | 0.376 | 0.5622        | 0.95 | 1.00 |
| 22 | rs11122366 | g | 230095958 | 1424 | - | A | 0.106 | 0.118 | 0.2749        | 0.89 | 1.00 | 0.115 | 0.115 | 0.9947        | 1.00 | 1.00        | 0.098 | 0.120 | 0.1383        | 0.80 | 1.00 |
| 22 | rs973607   | i | 230096488 | 530  | - | A | 0.128 | 0.123 | 0.6534        | 1.05 | 1.00 | 0.107 | 0.120 | 0.4475        | 0.88 | 1.00        | 0.146 | 0.126 | 0.2098        | 1.19 | 1.00 |
| 23 | rs1772686  | i | 230097002 | 514  | - | A | 0.319 | 0.344 | 0.1288        | 0.89 | 1.00 | 0.314 | 0.359 | 0.0705        | 0.82 | 1.00        | 0.324 | 0.333 | 0.6649        | 0.96 | 1.00 |
| 23 | rs12036931 | i | 230097706 | 704  | - | C | 0.104 | 0.117 | 0.2443        | 0.88 | 1.00 | 0.114 | 0.113 | 0.9464        | 1.01 | 1.00        | 0.097 | 0.120 | 0.1011        | 0.78 | 1.00 |
| 23 | rs12036218 | i | 230097783 | 77   | - | G | 0.104 | 0.117 | 0.2443        | 0.88 | 1.00 | 0.114 | 0.113 | 0.9464        | 1.01 | 1.00        | 0.097 | 0.120 | 0.1011        | 0.78 | 1.00 |
| 23 | rs11585831 | g | 230098200 | 417  | - | A | 0.048 | 0.051 | 0.7141        | 0.94 | 1.00 | 0.050 | 0.051 | 0.9432        | 0.98 | 1.00        | 0.046 | 0.051 | 0.6602        | 0.91 | 1.00 |
| 23 | rs967433   | g | 230098438 | 238  | - | C | 0.470 | 0.483 | 0.4291        | 0.95 | 1.00 | 0.445 | 0.490 | 0.0880        | 0.83 | 1.00        | 0.490 | 0.478 | 0.6285        | 1.05 | 1.00 |
| 23 | rs967434   | i | 230098775 | 337  | - | A | 0.458 | 0.472 | 0.4274        | 0.95 | 1.00 | 0.429 | 0.484 | <b>0.0368</b> | 0.80 | 0.98        | 0.482 | 0.463 | 0.4170        | 1.08 | 1.00 |
| 23 | rs7514897  | i | 230099554 | 779  | - | A | 0.104 | 0.117 | 0.2443        | 0.88 | 1.00 | 0.114 | 0.113 | 0.9464        | 1.01 | 1.00        | 0.097 | 0.120 | 0.1011        | 0.78 | 1.00 |
| 23 | rs6541290  | i | 230100101 | 547  | - | T | 0.104 | 0.117 | 0.2443        | 0.88 | 1.00 | 0.114 | 0.113 | 0.9464        | 1.01 | 1.00        | 0.097 | 0.120 | 0.1011        | 0.78 | 1.00 |
| 23 | rs17770256 | g | 230100175 | 74   | - | A | 0.064 | 0.049 | 0.0554        | 1.34 | 0.96 | 0.073 | 0.037 | <b>0.0032</b> | 2.02 | 0.22        | 0.057 | 0.057 | 0.9836        | 1.00 | 1.00 |
| 23 | rs17770286 | i | 230101807 | 1632 | - | G | 0.161 | 0.143 | 0.1540        | 1.15 | 1.00 | 0.178 | 0.139 | <b>0.0404</b> | 1.34 | 0.99        | 0.148 | 0.147 | 0.9706        | 1.01 | 1.00 |

|    |                             |   |           |      |   |   |       |       |               |      |      |       |       |               |      |      |       |       |               |      |      |
|----|-----------------------------|---|-----------|------|---|---|-------|-------|---------------|------|------|-------|-------|---------------|------|------|-------|-------|---------------|------|------|
| 23 | rs821723                    | g | 230101819 | 12   | - | C | 0.129 | 0.124 | 0.6779        | 1.05 | 1.00 | 0.109 | 0.119 | 0.5566        | 0.91 | 1.00 | 0.145 | 0.127 | 0.2791        | 1.16 | 1.00 |
| 23 | rs10864701                  | i | 230101907 | 88   | - | A | 0.103 | 0.117 | 0.1976        | 0.87 | 1.00 | 0.114 | 0.114 | 0.9884        | 1.00 | 1.00 | 0.093 | 0.118 | 0.0798        | 0.77 | 1.00 |
|    | <b>rs821722</b>             | i | 230102653 | 746  | - | A | 0.339 | 0.363 | 0.1550        | 0.90 | 1.00 | 0.331 | 0.383 | <b>0.0363</b> | 0.79 | 0.98 | 0.347 | 0.348 | 0.9588        | 1.00 | 1.00 |
|    | <b>rs860275<sup>p</sup></b> | g | 230102768 | 115  | - | C | 0.131 | 0.156 | <b>0.0451</b> | 0.82 | 0.93 | 0.142 | 0.152 | 0.5597        | 0.92 | 1.00 | 0.123 | 0.158 | <b>0.0287</b> | 0.74 | 0.82 |
|    | rs11577215                  | g | 230103529 | 761  | - | G | 0.082 | 0.084 | 0.8534        | 0.98 | 1.00 | 0.088 | 0.076 | 0.4055        | 1.17 | 1.00 | 0.076 | 0.089 | 0.3281        | 0.85 | 1.00 |
|    | rs7523326                   | i | 230107253 | 3724 | - | A | 0.012 | 0.012 | 0.9120        | 0.97 | 1.00 | 0.008 | 0.012 | 0.4618        | 0.68 | 1.00 | 0.015 | 0.012 | 0.6513        | 1.20 | 1.00 |
|    | rs2027457                   | i | 230116838 | 9585 | - | T | 0.012 | 0.012 | 0.9120        | 0.97 | 1.00 | 0.008 | 0.012 | 0.4618        | 0.68 | 1.00 | 0.015 | 0.012 | 0.6513        | 1.20 | 1.00 |
|    | rs10864702                  | g | 230117276 | 438  | - | C | 0.106 | 0.113 | 0.5380        | 0.93 | 1.00 | 0.112 | 0.104 | 0.6180        | 1.09 | 1.00 | 0.101 | 0.119 | 0.2110        | 0.83 | 1.00 |
| 24 | rs7541019                   | g | 230117808 | 532  | - | G | 0.245 | 0.263 | 0.2270        | 0.91 | 1.00 | 0.238 | 0.280 | 0.0714        | 0.80 | 0.99 | 0.250 | 0.251 | 0.9796        | 1.00 | 1.00 |
| 24 | rs11122373                  | i | 230120350 | 2542 | - | T | 0.098 | 0.098 | 0.9787        | 1.00 | 1.00 | 0.106 | 0.084 | 0.1650        | 1.28 | 1.00 | 0.091 | 0.108 | 0.2199        | 0.83 | 1.00 |
| 24 | rs11122374                  | i | 230120701 | 351  | - | G | 0.098 | 0.098 | 0.9787        | 1.00 | 1.00 | 0.106 | 0.084 | 0.1650        | 1.28 | 1.00 | 0.091 | 0.108 | 0.2199        | 0.83 | 1.00 |
| 24 | rs6687338                   | i | 230121194 | 493  | - | G | 0.098 | 0.098 | 0.9787        | 1.00 | 1.00 | 0.106 | 0.084 | 0.1650        | 1.28 | 1.00 | 0.091 | 0.108 | 0.2199        | 0.83 | 1.00 |
| 24 | rs4658963                   | g | 230121321 | 127  | - | G | 0.246 | 0.264 | 0.2450        | 0.91 | 1.00 | 0.238 | 0.280 | 0.0714        | 0.80 | 0.99 | 0.252 | 0.252 | 0.9701        | 1.00 | 1.00 |
| 24 | rs2038636                   | g | 230121872 | 551  | - | C | 0.380 | 0.403 | 0.1737        | 0.91 | 1.00 | 0.374 | 0.409 | 0.1787        | 0.86 | 1.00 | 0.384 | 0.399 | 0.5318        | 0.94 | 1.00 |
|    | rs821721                    | i | 230122853 | 981  | - | T | 0.384 | 0.362 | 0.1918        | 1.10 | 1.00 | 0.369 | 0.337 | 0.1947        | 1.15 | 1.00 | 0.397 | 0.382 | 0.5111        | 1.07 | 1.00 |
| 25 | rs1028665                   | i | 230122924 | 71   | - | G | 0.148 | 0.139 | 0.4729        | 1.07 | 1.00 | 0.158 | 0.125 | 0.0681        | 1.32 | 1.00 | 0.139 | 0.149 | 0.5190        | 0.92 | 1.00 |
| 25 | rs821717                    | i | 230126428 | 3504 | - | G | 0.232 | 0.220 | 0.3968        | 1.07 | 1.00 | 0.206 | 0.205 | 0.9852        | 1.00 | 1.00 | 0.253 | 0.231 | 0.2489        | 1.13 | 1.00 |
| 25 | rs6695394                   | g | 230127885 | 1457 | - | T | 0.048 | 0.049 | 0.8886        | 0.98 | 1.00 | 0.053 | 0.054 | 0.9467        | 0.98 | 1.00 | 0.043 | 0.045 | 0.8599        | 0.96 | 1.00 |
| 25 | rs7546310                   | i | 230128443 | 558  | - | A | 0.452 | 0.432 | 0.2382        | 1.09 | 1.00 | 0.439 | 0.409 | 0.2480        | 1.13 | 1.00 | 0.463 | 0.449 | 0.5474        | 1.06 | 1.00 |
| 25 | rs6687236                   | g | 230129853 | 1410 | - | T | 0.238 | 0.226 | 0.4428        | 1.07 | 1.00 | 0.209 | 0.212 | 0.8807        | 0.98 | 1.00 | 0.262 | 0.237 | 0.2258        | 1.14 | 1.00 |
| 25 | rs12125581                  | i | 230132644 | 2791 | - | A | 0.232 | 0.220 | 0.3968        | 1.07 | 1.00 | 0.206 | 0.205 | 0.9852        | 1.00 | 1.00 | 0.253 | 0.231 | 0.2489        | 1.13 | 1.00 |
| 25 | rs11122376                  | i | 230132717 | 73   | - | G | 0.232 | 0.220 | 0.3968        | 1.07 | 1.00 | 0.206 | 0.205 | 0.9852        | 1.00 | 1.00 | 0.253 | 0.231 | 0.2489        | 1.13 | 1.00 |
| 25 | rs11584798                  | i | 230132900 | 183  | - | T | 0.232 | 0.220 | 0.3968        | 1.07 | 1.00 | 0.206 | 0.205 | 0.9852        | 1.00 | 1.00 | 0.253 | 0.231 | 0.2489        | 1.13 | 1.00 |
| 25 | rs2356710                   | i | 230133586 | 686  | - | A | 0.232 | 0.220 | 0.3968        | 1.07 | 1.00 | 0.206 | 0.205 | 0.9852        | 1.00 | 1.00 | 0.253 | 0.231 | 0.2489        | 1.13 | 1.00 |
| 25 | rs821577                    | g | 230133680 | 94   | - | G | 0.458 | 0.439 | 0.2865        | 1.08 | 1.00 | 0.441 | 0.417 | 0.3527        | 1.10 | 1.00 | 0.471 | 0.456 | 0.5046        | 1.07 | 1.00 |
| 25 | rs12029109                  | i | 230135065 | 1385 | - | G | 0.046 | 0.048 | 0.8115        | 0.96 | 1.00 | 0.051 | 0.053 | 0.8908        | 0.97 | 1.00 | 0.042 | 0.044 | 0.8167        | 0.95 | 1.00 |
| 25 | rs1341555                   | i | 230135680 | 615  | - | T | 0.456 | 0.436 | 0.2459        | 1.09 | 1.00 | 0.442 | 0.413 | 0.2696        | 1.12 | 1.00 | 0.468 | 0.454 | 0.5325        | 1.06 | 1.00 |
| 25 | rs9431726                   | i | 230136276 | 596  | - | T | 0.219 | 0.212 | 0.6035        | 1.05 | 1.00 | 0.232 | 0.204 | 0.1933        | 1.18 | 1.00 | 0.209 | 0.218 | 0.6365        | 0.95 | 1.00 |
| 25 | rs4658891                   | i | 230138779 | 2503 | - | A | 0.144 | 0.138 | 0.5750        | 1.06 | 1.00 | 0.154 | 0.124 | 0.0921        | 1.29 | 1.00 | 0.136 | 0.148 | 0.4688        | 0.91 | 1.00 |
| 25 | rs1341556                   | i | 230138791 | 12   | - | A | 0.017 | 0.018 | 0.8790        | 0.96 | 1.00 | 0.013 | 0.018 | 0.4194        | 0.70 | 1.00 | 0.020 | 0.017 | 0.6398        | 1.17 | 1.00 |
| 25 | rs701158                    | i | 230139751 | 960  | - | G | 0.456 | 0.436 | 0.2459        | 1.09 | 1.00 | 0.442 | 0.413 | 0.2696        | 1.12 | 1.00 | 0.468 | 0.454 | 0.5325        | 1.06 | 1.00 |
| 25 | rs872624                    | i | 230141523 | 1772 | - | A | 0.141 | 0.135 | 0.6170        | 1.05 | 1.00 | 0.151 | 0.124 | 0.1241        | 1.26 | 1.00 | 0.133 | 0.144 | 0.4910        | 0.91 | 1.00 |
| 25 | rs872625                    | i | 230141596 | 73   | - | G | 0.217 | 0.209 | 0.5810        | 1.05 | 1.00 | 0.228 | 0.202 | 0.2394        | 1.16 | 1.00 | 0.208 | 0.214 | 0.7505        | 0.96 | 1.00 |
| 25 | rs9431730                   | i | 230143660 | 2064 | - | A | 0.046 | 0.048 | 0.8115        | 0.96 | 1.00 | 0.051 | 0.053 | 0.8908        | 0.97 | 1.00 | 0.042 | 0.044 | 0.8167        | 0.95 | 1.00 |
| 25 | rs821581                    | g | 230143695 | 35   | - | C | 0.226 | 0.220 | 0.6897        | 1.03 | 1.00 | 0.235 | 0.213 | 0.3176        | 1.14 | 1.00 | 0.218 | 0.225 | 0.7170        | 0.96 | 1.00 |
| 25 | rs2002626                   | i | 230143834 | 139  | - | G | 0.138 | 0.133 | 0.6610        | 1.05 | 1.00 | 0.149 | 0.120 | 0.1037        | 1.29 | 1.00 | 0.130 | 0.143 | 0.3997        | 0.89 | 1.00 |
| 25 | rs4658966                   | g | 230145237 | 1403 | - | C | 0.152 | 0.149 | 0.8230        | 1.02 | 1.00 | 0.164 | 0.137 | 0.1563        | 1.23 | 1.00 | 0.142 | 0.158 | 0.3390        | 0.88 | 1.00 |
| 25 | rs12132281                  | i | 230145463 | 226  | - | C | 0.152 | 0.148 | 0.7628        | 1.03 | 1.00 | 0.163 | 0.136 | 0.1537        | 1.23 | 1.00 | 0.143 | 0.157 | 0.3927        | 0.89 | 1.00 |
| 25 | rs12126719                  | i | 230145642 | 179  | - | G | 0.152 | 0.148 | 0.7628        | 1.03 | 1.00 | 0.163 | 0.136 | 0.1537        | 1.23 | 1.00 | 0.143 | 0.157 | 0.3927        | 0.89 | 1.00 |
| 25 | rs12127507                  | i | 230145671 | 29   | - | C | 0.152 | 0.148 | 0.7628        | 1.03 | 1.00 | 0.163 | 0.136 | 0.1537        | 1.23 | 1.00 | 0.143 | 0.157 | 0.3927        | 0.89 | 1.00 |

|    |                   |   |           |      |   |   |       |       |        |      |      |       |       |               |      |      |       |       |               |      |      |
|----|-------------------|---|-----------|------|---|---|-------|-------|--------|------|------|-------|-------|---------------|------|------|-------|-------|---------------|------|------|
| 25 | rs9431732         | i | 230145749 | 78   | - | G | 0.046 | 0.048 | 0.8115 | 0.96 | 1.00 | 0.051 | 0.053 | 0.8908        | 0.97 | 1.00 | 0.042 | 0.044 | 0.8167        | 0.95 | 1.00 |
| 25 | rs1094401         | i | 230150208 | 4459 | - | C | 0.221 | 0.220 | 0.9408 | 1.01 | 1.00 | 0.232 | 0.212 | 0.3587        | 1.12 | 1.00 | 0.211 | 0.225 | 0.4684        | 0.92 | 1.00 |
| 25 | rs16855691        | i | 230152108 | 1900 | - | A | 0.012 | 0.013 | 0.6829 | 0.88 | 1.00 | 0.011 | 0.015 | 0.5192        | 0.74 | 1.00 | 0.013 | 0.012 | 0.9761        | 1.01 | 1.00 |
| 25 | rs16855696        | i | 230152492 | 384  | - | G | 0.152 | 0.148 | 0.7628 | 1.03 | 1.00 | 0.163 | 0.136 | 0.1537        | 1.23 | 1.00 | 0.143 | 0.157 | 0.3927        | 0.89 | 1.00 |
| 25 | rs12137417        | i | 230152776 | 284  | - | A | 0.152 | 0.148 | 0.7628 | 1.03 | 1.00 | 0.163 | 0.136 | 0.1537        | 1.23 | 1.00 | 0.143 | 0.157 | 0.3927        | 0.89 | 1.00 |
|    | rs9432061         | i | 230153317 | 541  | - | G | 0.046 | 0.047 | 0.8061 | 0.96 | 1.00 | 0.050 | 0.053 | 0.7964        | 0.94 | 1.00 | 0.042 | 0.043 | 0.9014        | 0.97 | 1.00 |
|    | rs1417866         | i | 230153536 | 219  | - | G | 0.011 | 0.010 | 0.8482 | 1.07 | 1.00 | 0.011 | 0.014 | 0.6690        | 0.82 | 1.00 | na    | na    | na            | na   | na   |
|    | rs821585          | i | 230154072 | 536  | - | T | 0.012 | 0.015 | 0.4062 | 0.78 | 1.00 | 0.008 | 0.015 | 0.2403        | 0.55 | 1.00 | 0.015 | 0.015 | 0.9076        | 0.96 | 1.00 |
|    | rs12136198        | i | 230154938 | 866  | - | G | na    | na    | na     | na   | na   | 0.011 | 0.014 | 0.6690        | 0.82 | 1.00 | na    | na    | na            | na   | na   |
|    | rs9431735         | i | 230155839 | 901  | - | G | 0.041 | 0.046 | 0.4761 | 0.88 | 1.00 | 0.044 | 0.049 | 0.6862        | 0.90 | 1.00 | 0.038 | 0.043 | 0.5336        | 0.86 | 1.00 |
|    | rs9431736         | i | 230156363 | 524  | - | G | 0.082 | 0.090 | 0.4293 | 0.91 | 1.00 | 0.096 | 0.075 | 0.1492        | 1.31 | 1.00 | 0.070 | 0.101 | <b>0.0202</b> | 0.68 | 0.89 |
|    | <b>rs7548491</b>  | i | 230156875 | 512  | - | C | 0.294 | 0.289 | 0.7748 | 1.02 | 1.00 | 0.303 | 0.260 | 0.0663        | 1.24 | 1.00 | 0.286 | 0.312 | 0.2341        | 0.89 | 1.00 |
|    | rs12084523        | i | 230156938 | 63   | - | A | 0.013 | 0.016 | 0.4368 | 0.80 | 1.00 | 0.017 | 0.022 | 0.4810        | 0.76 | 1.00 | 0.010 | 0.012 | 0.6672        | 0.83 | 1.00 |
|    | rs2772122         | i | 230157116 | 178  | - | C | 0.205 | 0.210 | 0.7442 | 0.97 | 1.00 | 0.186 | 0.202 | 0.4310        | 0.90 | 1.00 | 0.221 | 0.215 | 0.7772        | 1.03 | 1.00 |
|    | rs821589          | i | 230157555 | 439  | - | T | 0.044 | 0.053 | 0.2357 | 0.83 | 1.00 | 0.047 | 0.060 | 0.2872        | 0.78 | 1.00 | 0.042 | 0.048 | 0.5147        | 0.86 | 1.00 |
|    | rs701160          | i | 230159104 | 1549 | - | T | 0.150 | 0.142 | 0.5293 | 1.06 | 1.00 | 0.151 | 0.135 | 0.3575        | 1.15 | 1.00 | 0.149 | 0.148 | 0.9655        | 1.01 | 1.00 |
|    | rs11122381        | g | 230160730 | 1626 | - | G | 0.217 | 0.218 | 0.9644 | 1.00 | 1.00 | 0.212 | 0.219 | 0.7346        | 0.96 | 1.00 | 0.222 | 0.217 | 0.8032        | 1.03 | 1.00 |
|    | <b>rs12118242</b> | i | 230160776 | 46   | - | T | 0.023 | 0.020 | 0.5232 | 1.17 | 1.00 | 0.031 | 0.014 | <b>0.0272</b> | 2.29 | 0.95 | 0.017 | 0.025 | 0.2524        | 0.69 | 1.00 |
| 26 | rs821592          | g | 230160882 | 106  | - | T | 0.284 | 0.284 | 0.9931 | 1.00 | 1.00 | 0.277 | 0.280 | 0.9169        | 0.99 | 1.00 | 0.289 | 0.287 | 0.9023        | 1.01 | 1.00 |
| 26 | rs2794273         | i | 230161352 | 470  | - | A | 0.243 | 0.241 | 0.8671 | 1.01 | 1.00 | 0.236 | 0.255 | 0.3919        | 0.90 | 1.00 | 0.249 | 0.229 | 0.3270        | 1.11 | 1.00 |
| 27 | rs6670775         | i | 230163324 | 1972 | - | C | 0.191 | 0.189 | 0.8417 | 1.02 | 1.00 | 0.182 | 0.200 | 0.3880        | 0.89 | 1.00 | 0.199 | 0.180 | 0.3015        | 1.13 | 1.00 |
| 27 | rs12754734        | g | 230165470 | 2146 | - | T | 0.189 | 0.186 | 0.8361 | 1.02 | 1.00 | 0.182 | 0.195 | 0.5221        | 0.92 | 1.00 | 0.194 | 0.179 | 0.3997        | 1.11 | 1.00 |
| 27 | rs4266866         | i | 230165482 | 12   | - | G | 0.191 | 0.188 | 0.8082 | 1.02 | 1.00 | 0.182 | 0.198 | 0.4247        | 0.90 | 1.00 | 0.199 | 0.180 | 0.3015        | 1.13 | 1.00 |
| 27 | rs12566923        | i | 230165638 | 156  | - | G | 0.041 | 0.043 | 0.6989 | 0.94 | 1.00 | 0.036 | 0.039 | 0.7419        | 0.91 | 1.00 | 0.044 | 0.046 | 0.8381        | 0.96 | 1.00 |
| 27 | rs4658894         | g | 230166517 | 879  | - | C | 0.041 | 0.043 | 0.7017 | 0.94 | 1.00 | 0.036 | 0.040 | 0.7111        | 0.90 | 1.00 | 0.044 | 0.046 | 0.8715        | 0.96 | 1.00 |
| 27 | rs821596          | i | 230168221 | 1704 | - | T | 0.244 | 0.245 | 0.9498 | 0.99 | 1.00 | 0.243 | 0.253 | 0.6695        | 0.95 | 1.00 | 0.246 | 0.240 | 0.7734        | 1.03 | 1.00 |
| 27 | rs821597          | i | 230168887 | 666  | - | A | 0.296 | 0.291 | 0.7695 | 1.02 | 1.00 | 0.290 | 0.296 | 0.8041        | 0.97 | 1.00 | 0.300 | 0.287 | 0.5406        | 1.07 | 1.00 |
| 27 | rs821598          | i | 230169970 | 1083 | - | T | 0.248 | 0.245 | 0.8514 | 1.02 | 1.00 | 0.247 | 0.253 | 0.8087        | 0.97 | 1.00 | 0.249 | 0.240 | 0.6470        | 1.05 | 1.00 |
| 27 | rs701161          | i | 230170737 | 767  | - | G | 0.297 | 0.293 | 0.7943 | 1.02 | 1.00 | 0.293 | 0.299 | 0.8066        | 0.97 | 1.00 | 0.300 | 0.288 | 0.5734        | 1.06 | 1.00 |
| 27 | rs12060283        | i | 230173702 | 2965 | - | C | 0.038 | 0.042 | 0.4943 | 0.89 | 1.00 | 0.032 | 0.038 | 0.5268        | 0.83 | 1.00 | 0.042 | 0.045 | 0.7349        | 0.93 | 1.00 |
| 27 | rs4658970         | i | 230174380 | 678  | - | T | 0.038 | 0.042 | 0.4943 | 0.89 | 1.00 | 0.032 | 0.038 | 0.5268        | 0.83 | 1.00 | 0.042 | 0.045 | 0.7349        | 0.93 | 1.00 |
| 27 | rs4658971         | g | 230174437 | 57   | - | T | 0.039 | 0.042 | 0.6267 | 0.92 | 1.00 | 0.032 | 0.040 | 0.4199        | 0.80 | 1.00 | 0.044 | 0.043 | 0.9496        | 1.02 | 1.00 |
| 27 | rs12126582        | i | 230174446 | 9    | - | A | 0.012 | 0.013 | 0.7939 | 0.92 | 1.00 | 0.013 | 0.012 | 0.9626        | 1.02 | 1.00 | 0.011 | 0.013 | 0.6964        | 0.85 | 1.00 |
| 27 | rs16855854        | i | 230175717 | 1271 | - | T | 0.041 | 0.043 | 0.6989 | 0.94 | 1.00 | 0.036 | 0.039 | 0.7419        | 0.91 | 1.00 | 0.044 | 0.046 | 0.8381        | 0.96 | 1.00 |
| 27 | rs12066297        | i | 230175846 | 129  | - | G | 0.041 | 0.043 | 0.6989 | 0.94 | 1.00 | 0.036 | 0.039 | 0.7419        | 0.91 | 1.00 | 0.044 | 0.046 | 0.8381        | 0.96 | 1.00 |
| 27 | rs821600          | i | 230183649 | 7803 | - | A | 0.299 | 0.297 | 0.9025 | 1.01 | 1.00 | 0.296 | 0.304 | 0.7230        | 0.96 | 1.00 | 0.302 | 0.292 | 0.6350        | 1.05 | 1.00 |
| 27 | rs821663          | i | 230187845 | 4196 | - | T | 0.292 | 0.295 | 0.8685 | 0.99 | 1.00 | 0.292 | 0.300 | 0.7191        | 0.96 | 1.00 | 0.292 | 0.290 | 0.9275        | 1.01 | 1.00 |
| 27 | rs821664          | i | 230188545 | 700  | - | T | 0.289 | 0.295 | 0.7461 | 0.98 | 1.00 | 0.289 | 0.302 | 0.5941        | 0.94 | 1.00 | 0.290 | 0.289 | 0.9744        | 1.00 | 1.00 |
| 27 | rs701162          | i | 230191674 | 3129 | - | C | 0.291 | 0.295 | 0.8375 | 0.98 | 1.00 | 0.292 | 0.300 | 0.7191        | 0.96 | 1.00 | 0.291 | 0.290 | 0.9703        | 1.00 | 1.00 |
| 27 | rs701163          | i | 230191732 | 58   | - | G | 0.251 | 0.251 | 0.9979 | 1.00 | 1.00 | 0.256 | 0.262 | 0.7714        | 0.97 | 1.00 | 0.247 | 0.242 | 0.8094        | 1.03 | 1.00 |



|    |            |   |           |      |     |   |       |       |        |      |      |       |       |        |      |      |       |       |        |      |      |
|----|------------|---|-----------|------|-----|---|-------|-------|--------|------|------|-------|-------|--------|------|------|-------|-------|--------|------|------|
| 27 | rs12564399 | i | 230192495 | 763  | -   | A | 0.038 | 0.042 | 0.4943 | 0.89 | 1.00 | 0.033 | 0.038 | 0.6282 | 0.87 | 1.00 | 0.041 | 0.045 | 0.6450 | 0.90 | 1.00 |
| 27 | rs821651   | i | 230193226 | 731  | -   | A | 0.250 | 0.250 | 1.0000 | 1.00 | 1.00 | 0.254 | 0.262 | 0.7253 | 0.96 | 1.00 | 0.247 | 0.241 | 0.7696 | 1.03 | 1.00 |
| 27 | rs821652   | i | 230193279 | 53   | -   | A | 0.250 | 0.250 | 1.0000 | 1.00 | 1.00 | 0.254 | 0.262 | 0.7253 | 0.96 | 1.00 | 0.247 | 0.241 | 0.7696 | 1.03 | 1.00 |
| 27 | rs16855913 | i | 230193351 | 72   | -   | A | 0.038 | 0.042 | 0.4943 | 0.89 | 1.00 | 0.033 | 0.038 | 0.6282 | 0.87 | 1.00 | 0.041 | 0.045 | 0.6450 | 0.90 | 1.00 |
| 27 | rs821653   | i | 230193510 | 159  | -   | G | 0.251 | 0.249 | 0.9360 | 1.01 | 1.00 | 0.256 | 0.260 | 0.8630 | 0.98 | 1.00 | 0.247 | 0.242 | 0.8094 | 1.03 | 1.00 |
| 27 | rs16855921 | i | 230193718 | 208  | -   | A | 0.041 | 0.047 | 0.3414 | 0.85 | 1.00 | 0.035 | 0.043 | 0.3891 | 0.79 | 1.00 | 0.045 | 0.050 | 0.6184 | 0.90 | 1.00 |
| 27 | rs821654   | i | 230193977 | 259  | -   | G | 0.289 | 0.293 | 0.8314 | 0.98 | 1.00 | 0.289 | 0.298 | 0.7165 | 0.96 | 1.00 | 0.290 | 0.289 | 0.9744 | 1.00 | 1.00 |
| 27 | rs4658972  | i | 230194387 | 410  | -   | G | 0.041 | 0.043 | 0.6989 | 0.94 | 1.00 | 0.036 | 0.039 | 0.7419 | 0.91 | 1.00 | 0.044 | 0.046 | 0.8381 | 0.96 | 1.00 |
| 27 | rs821655   | i | 230194884 | 497  | -   | T | 0.289 | 0.293 | 0.8314 | 0.98 | 1.00 | 0.289 | 0.298 | 0.7165 | 0.96 | 1.00 | 0.290 | 0.289 | 0.9744 | 1.00 | 1.00 |
| 27 | rs16855938 | i | 230195127 | 243  | -   | C | 0.038 | 0.042 | 0.4943 | 0.89 | 1.00 | 0.033 | 0.038 | 0.6282 | 0.87 | 1.00 | 0.041 | 0.045 | 0.6450 | 0.90 | 1.00 |
| 27 | rs12406771 | i | 230195957 | 830  | -   | T | 0.038 | 0.042 | 0.4943 | 0.89 | 1.00 | 0.033 | 0.038 | 0.6282 | 0.87 | 1.00 | 0.041 | 0.045 | 0.6450 | 0.90 | 1.00 |
| 27 | rs1417863  | i | 230196553 | 596  | -   | A | 0.018 | 0.026 | 0.0835 | 0.66 | 1.00 | 0.017 | 0.024 | 0.2955 | 0.68 | 1.00 | 0.018 | 0.028 | 0.1709 | 0.65 | 1.00 |
| 27 | rs843979   | i | 230197231 | 678  | -   | G | 0.291 | 0.295 | 0.8068 | 0.98 | 1.00 | 0.290 | 0.302 | 0.6352 | 0.95 | 1.00 | 0.291 | 0.289 | 0.9315 | 1.01 | 1.00 |
| 27 | rs821660   | i | 230201643 | 4412 | -   | T | 0.252 | 0.249 | 0.8398 | 1.02 | 1.00 | 0.256 | 0.261 | 0.8168 | 0.97 | 1.00 | 0.249 | 0.240 | 0.6470 | 1.05 | 1.00 |
| 27 | rs821661   | i | 230201820 | 177  | -   | A | 0.251 | 0.248 | 0.8437 | 1.02 | 1.00 | 0.254 | 0.260 | 0.8155 | 0.97 | 1.00 | 0.248 | 0.239 | 0.6504 | 1.05 | 1.00 |
| 27 | rs7537548  | i | 230202924 | 1104 | -   | G | 0.259 | 0.253 | 0.7013 | 1.03 | 1.00 | 0.263 | 0.266 | 0.8693 | 0.98 | 1.00 | 0.256 | 0.243 | 0.5219 | 1.07 | 1.00 |
| 27 | rs7525983  | i | 230202938 | 14   | -   | G | 0.259 | 0.253 | 0.7013 | 1.03 | 1.00 | 0.263 | 0.266 | 0.8693 | 0.98 | 1.00 | 0.256 | 0.243 | 0.5219 | 1.07 | 1.00 |
| 27 | rs3121910  | i | 230203816 | 878  | -   | G | 0.249 | 0.244 | 0.7273 | 1.03 | 1.00 | 0.251 | 0.255 | 0.8592 | 0.98 | 1.00 | 0.248 | 0.236 | 0.5424 | 1.07 | 1.00 |
| 27 | rs2772120  | i | 230203899 | 83   | -   | C | 0.249 | 0.245 | 0.7569 | 1.03 | 1.00 | 0.251 | 0.257 | 0.8128 | 0.97 | 1.00 | 0.248 | 0.236 | 0.5424 | 1.07 | 1.00 |
| 27 | rs1754607  | i | 230203999 | 100  | -   | A | 0.296 | 0.294 | 0.9140 | 1.01 | 1.00 | 0.297 | 0.304 | 0.7669 | 0.97 | 1.00 | 0.294 | 0.286 | 0.6939 | 1.04 | 1.00 |
| 27 | rs1754606  | i | 230204217 | 218  | -   | C | 0.249 | 0.245 | 0.7569 | 1.03 | 1.00 | 0.251 | 0.257 | 0.8128 | 0.97 | 1.00 | 0.248 | 0.236 | 0.5424 | 1.07 | 1.00 |
| 27 | rs9432088  | i | 230204297 | 80   | -   | C | 0.249 | 0.245 | 0.7569 | 1.03 | 1.00 | 0.251 | 0.257 | 0.8128 | 0.97 | 1.00 | 0.248 | 0.236 | 0.5424 | 1.07 | 1.00 |
| 27 | rs9432089  | i | 230205022 | 725  | -   | G | 0.259 | 0.251 | 0.5901 | 1.04 | 1.00 | 0.263 | 0.266 | 0.8693 | 0.98 | 1.00 | 0.256 | 0.239 | 0.3968 | 1.10 | 1.00 |
| 27 | rs9432090  | i | 230205056 | 34   | -   | A | 0.249 | 0.244 | 0.7273 | 1.03 | 1.00 | 0.251 | 0.257 | 0.8128 | 0.97 | 1.00 | 0.248 | 0.235 | 0.5084 | 1.08 | 1.00 |
| 27 | rs1754604  | i | 230205230 | 174  | -   | C | 0.249 | 0.244 | 0.6981 | 1.03 | 1.00 | 0.251 | 0.258 | 0.7672 | 0.97 | 1.00 | 0.248 | 0.233 | 0.4437 | 1.09 | 1.00 |
| 27 | rs1754603  | i | 230205245 | 15   | -   | T | 0.249 | 0.244 | 0.6981 | 1.03 | 1.00 | 0.251 | 0.258 | 0.7672 | 0.97 | 1.00 | 0.248 | 0.233 | 0.4437 | 1.09 | 1.00 |
| 27 | rs1772699  | i | 230205599 | 354  | -   | G | 0.249 | 0.244 | 0.6981 | 1.03 | 1.00 | 0.251 | 0.258 | 0.7672 | 0.97 | 1.00 | 0.248 | 0.233 | 0.4437 | 1.09 | 1.00 |
| 27 | rs1772696  | i | 230205818 | 219  | -   | G | 0.249 | 0.244 | 0.6981 | 1.03 | 1.00 | 0.251 | 0.258 | 0.7672 | 0.97 | 1.00 | 0.248 | 0.233 | 0.4437 | 1.09 | 1.00 |
| 27 | rs2806474  | i | 230206902 | 1084 | -   | G | 0.249 | 0.244 | 0.6981 | 1.03 | 1.00 | 0.251 | 0.258 | 0.7672 | 0.97 | 1.00 | 0.248 | 0.233 | 0.4437 | 1.09 | 1.00 |
| 27 | rs2772114  | i | 230206966 | 64   | -   | G | 0.259 | 0.249 | 0.5109 | 1.05 | 1.00 | 0.263 | 0.265 | 0.9157 | 0.99 | 1.00 | 0.257 | 0.238 | 0.3394 | 1.11 | 1.00 |
| 27 | rs2806475  | i | 230207038 | 72   | -   | G | 0.259 | 0.249 | 0.4862 | 1.06 | 1.00 | 0.263 | 0.264 | 0.9624 | 0.99 | 1.00 | 0.257 | 0.238 | 0.3394 | 1.11 | 1.00 |
| 27 | rs821602   | i | 230208027 | 989  | -   | C | 0.255 | 0.251 | 0.7703 | 1.02 | 1.00 | 0.257 | 0.265 | 0.7282 | 0.96 | 1.00 | 0.253 | 0.240 | 0.4944 | 1.08 | 1.00 |
| 27 | rs821605   | i | 230208559 | 532  | -   | G | 0.249 | 0.243 | 0.6693 | 1.04 | 1.00 | 0.251 | 0.257 | 0.8128 | 0.97 | 1.00 | 0.248 | 0.233 | 0.4437 | 1.09 | 1.00 |
| 27 | rs860272   | i | 230209132 | 573  | -   | T | 0.249 | 0.243 | 0.6693 | 1.04 | 1.00 | 0.251 | 0.257 | 0.8128 | 0.97 | 1.00 | 0.248 | 0.233 | 0.4437 | 1.09 | 1.00 |
| 27 | rs821615   | i | 230210569 | 1437 | -   | C | 0.249 | 0.243 | 0.6693 | 1.04 | 1.00 | 0.251 | 0.257 | 0.8128 | 0.97 | 1.00 | 0.248 | 0.233 | 0.4437 | 1.09 | 1.00 |
| 27 | rs821616   | i | 230211221 | 652  | S/C | T | 0.249 | 0.243 | 0.6693 | 1.04 | 1.00 | 0.251 | 0.257 | 0.8128 | 0.97 | 1.00 | 0.248 | 0.233 | 0.4437 | 1.09 | 1.00 |
| 27 | rs821620   | i | 230212308 | 1087 | -   | A | 0.253 | 0.246 | 0.6610 | 1.04 | 1.00 | 0.254 | 0.260 | 0.8155 | 0.97 | 1.00 | 0.251 | 0.236 | 0.4362 | 1.09 | 1.00 |
| 27 | rs821621   | i | 230212687 | 379  | -   | A | 0.249 | 0.243 | 0.6693 | 1.04 | 1.00 | 0.251 | 0.257 | 0.8128 | 0.97 | 1.00 | 0.248 | 0.233 | 0.4437 | 1.09 | 1.00 |
| 27 | rs821622   | i | 230213028 | 341  | -   | A | 0.249 | 0.243 | 0.6693 | 1.04 | 1.00 | 0.251 | 0.257 | 0.8128 | 0.97 | 1.00 | 0.248 | 0.233 | 0.4437 | 1.09 | 1.00 |
| 27 | rs821623   | i | 230213204 | 176  | -   | G | 0.249 | 0.243 | 0.6693 | 1.04 | 1.00 | 0.251 | 0.257 | 0.8128 | 0.97 | 1.00 | 0.248 | 0.233 | 0.4437 | 1.09 | 1.00 |

|    |                   |   |           |      |   |   |       |       |        |      |      |       |       |               |      |      |       |       |               |      |      |
|----|-------------------|---|-----------|------|---|---|-------|-------|--------|------|------|-------|-------|---------------|------|------|-------|-------|---------------|------|------|
| 27 | rs866596          | i | 230213553 | 349  | - | G | 0.250 | 0.242 | 0.6115 | 1.04 | 1.00 | 0.253 | 0.255 | 0.9073        | 0.99 | 1.00 | 0.248 | 0.233 | 0.4437        | 1.09 | 1.00 |
| 27 | rs821624          | i | 230213717 | 164  | - | C | 0.301 | 0.293 | 0.6461 | 1.04 | 1.00 | 0.303 | 0.303 | 0.9930        | 1.00 | 1.00 | 0.299 | 0.286 | 0.5435        | 1.06 | 1.00 |
| 27 | rs821627          | i | 230213791 | 74   | - | T | 0.301 | 0.293 | 0.6461 | 1.04 | 1.00 | 0.303 | 0.303 | 0.9930        | 1.00 | 1.00 | 0.299 | 0.286 | 0.5435        | 1.06 | 1.00 |
| 27 | rs16856152        | i | 230213833 | 42   | - | T | 0.039 | 0.042 | 0.7491 | 0.95 | 1.00 | 0.039 | 0.037 | 0.8254        | 1.06 | 1.00 | 0.040 | 0.045 | 0.5590        | 0.87 | 1.00 |
| 27 | rs821628          | i | 230213874 | 41   | - | T | 0.249 | 0.242 | 0.6710 | 1.04 | 1.00 | 0.251 | 0.255 | 0.8592        | 0.98 | 1.00 | 0.247 | 0.233 | 0.4781        | 1.08 | 1.00 |
| 27 | rs821629          | i | 230214015 | 141  | - | T | 0.249 | 0.242 | 0.6710 | 1.04 | 1.00 | 0.251 | 0.255 | 0.8592        | 0.98 | 1.00 | 0.247 | 0.233 | 0.4781        | 1.08 | 1.00 |
| 27 | rs849349          | i | 230214027 | 12   | - | A | 0.301 | 0.293 | 0.6198 | 1.04 | 1.00 | 0.303 | 0.303 | 0.9930        | 1.00 | 1.00 | 0.299 | 0.285 | 0.5115        | 1.07 | 1.00 |
| 27 | rs866055          | i | 230214191 | 164  | - | G | 0.259 | 0.246 | 0.3951 | 1.07 | 1.00 | 0.263 | 0.258 | 0.8501        | 1.02 | 1.00 | 0.256 | 0.237 | 0.3414        | 1.11 | 1.00 |
| 27 | rs864752          | i | 230214223 | 32   | - | A | 0.300 | 0.290 | 0.5451 | 1.05 | 1.00 | 0.303 | 0.299 | 0.8723        | 1.02 | 1.00 | 0.298 | 0.284 | 0.5143        | 1.07 | 1.00 |
| 27 | rs2149736         | i | 230214510 | 287  | - | T | 0.039 | 0.042 | 0.6196 | 0.92 | 1.00 | 0.039 | 0.037 | 0.8254        | 1.06 | 1.00 | 0.039 | 0.046 | 0.4153        | 0.83 | 1.00 |
| 27 | <b>rs821631</b>   | i | 230214758 | 248  | - | C | 0.372 | 0.359 | 0.4386 | 1.06 | 1.00 | 0.385 | 0.333 | <b>0.0392</b> | 1.25 | 0.99 | 0.361 | 0.379 | 0.4430        | 0.93 | 1.00 |
| 28 | rs11576588        | g | 230214819 | 61   | - | T | 0.213 | 0.210 | 0.8077 | 1.02 | 1.00 | 0.211 | 0.220 | 0.6532        | 0.94 | 1.00 | 0.215 | 0.202 | 0.4743        | 1.09 | 1.00 |
| 28 | <b>rs821633</b>   | g | 230215556 | 737  | - | G | 0.318 | 0.339 | 0.2195 | 0.91 | 1.00 | 0.325 | 0.312 | 0.5914        | 1.06 | 1.00 | 0.313 | 0.359 | <b>0.0388</b> | 0.81 | 0.90 |
| 28 | rs821634          | i | 230216143 | 587  | - | A | 0.323 | 0.306 | 0.3130 | 1.08 | 1.00 | 0.331 | 0.289 | 0.0895        | 1.21 | 1.00 | 0.316 | 0.319 | 0.8891        | 0.99 | 1.00 |
| 28 | rs821635          | i | 230216164 | 21   | - | T | 0.322 | 0.306 | 0.3139 | 1.08 | 1.00 | 0.329 | 0.289 | 0.1007        | 1.21 | 1.00 | 0.316 | 0.318 | 0.9267        | 0.99 | 1.00 |
| 28 | rs821637          | i | 230216334 | 170  | - | C | 0.329 | 0.314 | 0.3579 | 1.07 | 1.00 | 0.339 | 0.292 | 0.0548        | 1.24 | 1.00 | 0.321 | 0.330 | 0.6534        | 0.96 | 1.00 |
| 28 | rs821638          | i | 230216431 | 97   | - | G | 0.341 | 0.329 | 0.4571 | 1.06 | 1.00 | 0.353 | 0.317 | 0.1432        | 1.18 | 1.00 | 0.332 | 0.339 | 0.7618        | 0.97 | 1.00 |
| 28 | rs821639          | i | 230216466 | 35   | - | G | 0.343 | 0.334 | 0.5679 | 1.04 | 1.00 | 0.349 | 0.322 | 0.2824        | 1.13 | 1.00 | 0.339 | 0.343 | 0.8576        | 0.98 | 1.00 |
| 28 | rs821640          | i | 230216518 | 52   | - | G | 0.343 | 0.331 | 0.4752 | 1.05 | 1.00 | 0.353 | 0.319 | 0.1762        | 1.16 | 1.00 | 0.335 | 0.341 | 0.8094        | 0.98 | 1.00 |
| 28 | rs821641          | i | 230216601 | 83   | - | T | 0.343 | 0.331 | 0.4752 | 1.05 | 1.00 | 0.353 | 0.319 | 0.1762        | 1.16 | 1.00 | 0.335 | 0.341 | 0.8094        | 0.98 | 1.00 |
| 28 | rs821642          | i | 230216752 | 151  | - | T | 0.343 | 0.332 | 0.4976 | 1.05 | 1.00 | 0.353 | 0.319 | 0.1762        | 1.16 | 1.00 | 0.335 | 0.342 | 0.7735        | 0.97 | 1.00 |
| 28 | rs821643          | i | 230216813 | 61   | - | G | 0.344 | 0.332 | 0.4739 | 1.05 | 1.00 | 0.353 | 0.319 | 0.1762        | 1.16 | 1.00 | 0.336 | 0.342 | 0.8134        | 0.98 | 1.00 |
| 28 | rs821644          | i | 230216822 | 9    | - | G | 0.344 | 0.333 | 0.5191 | 1.05 | 1.00 | 0.353 | 0.321 | 0.1946        | 1.16 | 1.00 | 0.336 | 0.343 | 0.7774        | 0.97 | 1.00 |
| 28 | rs821645          | i | 230217114 | 292  | - | A | 0.344 | 0.333 | 0.5191 | 1.05 | 1.00 | 0.353 | 0.321 | 0.1946        | 1.16 | 1.00 | 0.336 | 0.343 | 0.7774        | 0.97 | 1.00 |
| 28 | rs821647          | i | 230218531 | 1417 | - | G | 0.339 | 0.327 | 0.4843 | 1.05 | 1.00 | 0.342 | 0.315 | 0.2826        | 1.13 | 1.00 | 0.336 | 0.336 | 0.9980        | 1.00 | 1.00 |
| 28 | rs821648          | i | 230219654 | 1123 | - | C | 0.345 | 0.336 | 0.5879 | 1.04 | 1.00 | 0.354 | 0.322 | 0.1946        | 1.16 | 1.00 | 0.338 | 0.347 | 0.6766        | 0.96 | 1.00 |
| 28 | rs16856189        | g | 230220006 | 352  | - | A | 0.038 | 0.043 | 0.5167 | 0.89 | 1.00 | 0.038 | 0.038 | 0.9832        | 1.01 | 1.00 | 0.038 | 0.047 | 0.3927        | 0.82 | 1.00 |
| 28 | rs1341553         | g | 230220204 | 198  | - | G | 0.420 | 0.438 | 0.2928 | 0.93 | 1.00 | 0.427 | 0.418 | 0.7332        | 1.04 | 1.00 | 0.414 | 0.453 | 0.0924        | 0.85 | 0.99 |
| 28 | rs1475514         | i | 230220416 | 212  | - | G | 0.421 | 0.439 | 0.3159 | 0.93 | 1.00 | 0.426 | 0.420 | 0.8003        | 1.03 | 1.00 | 0.417 | 0.453 | 0.1225        | 0.87 | 1.00 |
|    | rs928099          | i | 230221459 | 1043 | - | T | 0.234 | 0.230 | 0.7707 | 1.02 | 1.00 | 0.253 | 0.236 | 0.4676        | 1.09 | 1.00 | 0.219 | 0.225 | 0.7569        | 0.97 | 1.00 |
|    | rs16856202        | i | 230221774 | 315  | - | G | 0.015 | 0.014 | 0.8197 | 1.07 | 1.00 | 0.013 | 0.015 | 0.6885        | 0.83 | 1.00 | 0.017 | 0.013 | 0.5179        | 1.28 | 1.00 |
|    | <b>rs2806458</b>  | i | 230222878 | 1104 | - | A | 0.447 | 0.442 | 0.7537 | 1.02 | 1.00 | 0.476 | 0.421 | <b>0.0342</b> | 1.25 | 0.98 | 0.423 | 0.457 | 0.1403        | 0.87 | 1.00 |
|    | rs12062781        | i | 230223253 | 375  | - | G | 0.015 | 0.014 | 0.8197 | 1.07 | 1.00 | 0.013 | 0.015 | 0.6885        | 0.83 | 1.00 | 0.017 | 0.013 | 0.5179        | 1.28 | 1.00 |
|    | <b>rs7533169</b>  | i | 230223389 | 136  | - | A | 0.168 | 0.173 | 0.6899 | 0.96 | 1.00 | 0.132 | 0.185 | <b>0.0058</b> | 0.67 | 0.54 | 0.197 | 0.164 | 0.0644        | 1.25 | 1.00 |
|    | rs11588595        | i | 230224139 | 750  | - | C | 0.044 | 0.055 | 0.1593 | 0.80 | 1.00 | 0.042 | 0.049 | 0.5063        | 0.85 | 1.00 | 0.047 | 0.060 | 0.2114        | 0.77 | 1.00 |
|    | <b>rs3524</b>     | i | 230225302 | 1163 | - | G | 0.467 | 0.464 | 0.8548 | 1.01 | 1.00 | 0.501 | 0.448 | <b>0.0428</b> | 1.24 | 0.99 | 0.439 | 0.475 | 0.1137        | 0.86 | 1.00 |
|    | rs16856230        | i | 230226159 | 857  | - | C | 0.015 | 0.013 | 0.7095 | 1.12 | 1.00 | 0.013 | 0.014 | 0.8550        | 0.92 | 1.00 | 0.017 | 0.013 | 0.5179        | 1.28 | 1.00 |
|    | rs16856236        | i | 230226681 | 522  | - | G | 0.015 | 0.013 | 0.7095 | 1.12 | 1.00 | 0.013 | 0.014 | 0.8550        | 0.92 | 1.00 | 0.017 | 0.013 | 0.5179        | 1.28 | 1.00 |
|    | <b>rs12088230</b> | i | 230228306 | 1625 | - | C | 0.347 | 0.322 | 0.1298 | 1.12 | 1.00 | 0.376 | 0.307 | <b>0.0053</b> | 1.36 | 0.52 | 0.323 | 0.333 | 0.6274        | 0.95 | 1.00 |
|    | rs16856254        | i | 230228487 | 181  | - | T | 0.013 | 0.012 | 0.8313 | 1.07 | 1.00 | 0.018 | 0.008 | 0.0960        | 2.24 | 1.00 | 0.009 | 0.015 | 0.2185        | 0.59 | 1.00 |

|    |                   |   |           |      |   |   |       |       |               |      |      |       |       |               |      |      |       |       |               |      |      |
|----|-------------------|---|-----------|------|---|---|-------|-------|---------------|------|------|-------|-------|---------------|------|------|-------|-------|---------------|------|------|
| 29 | rs1160491         | i | 230228516 | 29   | - | A | 0.368 | 0.381 | 0.4177        | 0.94 | 1.00 | 0.390 | 0.376 | 0.5849        | 1.06 | 1.00 | 0.349 | 0.385 | 0.1095        | 0.86 | 1.00 |
| 29 | <b>rs2807578</b>  | i | 230230726 | 2210 | - | G | 0.419 | 0.416 | 0.8300        | 1.02 | 1.00 | 0.392 | 0.443 | <b>0.0473</b> | 0.81 | 0.99 | 0.442 | 0.395 | <b>0.0406</b> | 1.21 | 0.99 |
|    | rs2806465         | i | 230232917 | 2191 | - | G | 0.423 | 0.427 | 0.7757        | 0.98 | 1.00 | 0.439 | 0.413 | 0.3187        | 1.11 | 1.00 | 0.409 | 0.438 | 0.2045        | 0.89 | 1.00 |
| 30 | rs9701655         | i | 230232941 | 24   | - | G | 0.209 | 0.213 | 0.7585        | 0.97 | 1.00 | 0.185 | 0.215 | 0.1530        | 0.83 | 1.00 | 0.228 | 0.212 | 0.3925        | 1.10 | 1.00 |
| 30 | rs9699636         | i | 230232955 | 14   | - | A | 0.208 | 0.213 | 0.7251        | 0.97 | 1.00 | 0.183 | 0.215 | 0.1344        | 0.82 | 1.00 | 0.228 | 0.212 | 0.3925        | 1.10 | 1.00 |
| 30 | <b>rs9663054</b>  | i | 230234827 | 1872 | - | G | 0.049 | 0.049 | 0.9835        | 1.00 | 1.00 | 0.058 | 0.035 | <b>0.0375</b> | 1.69 | 0.98 | 0.041 | 0.059 | 0.0810        | 0.68 | 1.00 |
| 30 | rs9726024         | g | 230235123 | 296  | - | A | 0.370 | 0.350 | 0.2498        | 1.09 | 1.00 | 0.371 | 0.364 | 0.7868        | 1.03 | 1.00 | 0.368 | 0.340 | 0.2026        | 1.13 | 1.00 |
| 31 | rs9729194         | i | 230235490 | 367  | - | T | 0.223 | 0.226 | 0.8097        | 0.98 | 1.00 | 0.204 | 0.222 | 0.4201        | 0.90 | 1.00 | 0.238 | 0.229 | 0.6815        | 1.05 | 1.00 |
| 31 | rs16856305        | i | 230238152 | 2662 | - | G | 0.038 | 0.026 | 0.0675        | 1.44 | 1.00 | 0.039 | 0.024 | 0.1155        | 1.61 | 1.00 | 0.036 | 0.028 | 0.2934        | 1.32 | 1.00 |
| 31 | <b>rs16856308</b> | g | 230238240 | 88   | - | T | 0.150 | 0.154 | 0.7198        | 0.97 | 1.00 | 0.137 | 0.183 | <b>0.0204</b> | 0.71 | 0.74 | 0.160 | 0.134 | 0.1086        | 1.24 | 1.00 |
| 31 | rs17773715        | i | 230238997 | 757  | - | A | 0.179 | 0.158 | 0.1019        | 1.16 | 1.00 | 0.188 | 0.154 | 0.0847        | 1.27 | 1.00 | 0.173 | 0.162 | 0.5184        | 1.08 | 1.00 |
| 31 | rs3737597         | i | 230239461 | 464  | - | A | 0.038 | 0.026 | 0.0675        | 1.44 | 1.00 | 0.039 | 0.024 | 0.1155        | 1.61 | 1.00 | 0.036 | 0.028 | 0.2934        | 1.32 | 1.00 |
| 31 | rs11578905        | i | 230240144 | 683  | - | T | 0.259 | 0.262 | 0.8164        | 0.98 | 1.00 | 0.244 | 0.249 | 0.8526        | 0.98 | 1.00 | 0.271 | 0.273 | 0.9161        | 0.99 | 1.00 |
| 31 | rs9729179         | g | 230240796 | 652  | - | C | 0.297 | 0.290 | 0.6640        | 1.03 | 1.00 | 0.286 | 0.276 | 0.6705        | 1.05 | 1.00 | 0.307 | 0.301 | 0.7995        | 1.03 | 1.00 |
| 31 | rs1411771         | i | 230241398 | 602  | - | C | 0.298 | 0.290 | 0.5999        | 1.04 | 1.00 | 0.286 | 0.276 | 0.6621        | 1.05 | 1.00 | 0.308 | 0.300 | 0.7245        | 1.04 | 1.00 |
| 31 | rs11122396        | i | 230241891 | 493  | - | G | 0.038 | 0.026 | 0.0675        | 1.44 | 1.00 | 0.039 | 0.024 | 0.1155        | 1.61 | 1.00 | 0.036 | 0.028 | 0.2934        | 1.32 | 1.00 |
| 31 | rs980989          | g | 230242818 | 927  | - | T | 0.241 | 0.246 | 0.7693        | 0.98 | 1.00 | 0.223 | 0.236 | 0.5649        | 0.93 | 1.00 | 0.257 | 0.254 | 0.8708        | 1.02 | 1.00 |
| 31 | rs9308481         | i | 230242929 | 111  | - | A | 0.257 | 0.257 | 0.9921        | 1.00 | 1.00 | 0.242 | 0.242 | 0.9936        | 1.00 | 1.00 | 0.269 | 0.269 | 0.9691        | 1.00 | 1.00 |
| 31 | rs11803088        | i | 230243392 | 463  | - | T | 0.121 | 0.108 | 0.2434        | 1.14 | 1.00 | 0.124 | 0.107 | 0.3312        | 1.17 | 1.00 | 0.118 | 0.108 | 0.4903        | 1.11 | 1.00 |
| 31 | rs16856322        | i | 230243610 | 218  | - | T | 0.298 | 0.288 | 0.5508        | 1.05 | 1.00 | 0.285 | 0.273 | 0.6209        | 1.06 | 1.00 | 0.308 | 0.299 | 0.6887        | 1.04 | 1.00 |
| 31 | rs1411775         | i | 230243925 | 315  | - | A | 0.114 | 0.115 | 0.9727        | 1.00 | 1.00 | 0.107 | 0.139 | 0.0660        | 0.74 | 1.00 | 0.121 | 0.097 | 0.1001        | 1.28 | 1.00 |
| 31 | <b>rs1411776</b>  | g | 230244110 | 185  | - | A | 0.153 | 0.156 | 0.8467        | 0.98 | 1.00 | 0.143 | 0.186 | <b>0.0289</b> | 0.73 | 0.84 | 0.162 | 0.134 | 0.0857        | 1.26 | 0.99 |
| 31 | rs16856330        | i | 230244285 | 175  | - | G | 0.038 | 0.026 | 0.0675        | 1.44 | 1.00 | 0.039 | 0.024 | 0.1155        | 1.61 | 1.00 | 0.036 | 0.028 | 0.2934        | 1.32 | 1.00 |
| 31 | rs12118641        | i | 230244593 | 308  | - | T | 0.244 | 0.244 | 0.9789        | 1.00 | 1.00 | 0.224 | 0.232 | 0.6915        | 0.95 | 1.00 | 0.260 | 0.253 | 0.7253        | 1.04 | 1.00 |
| 31 | <b>rs1331056</b>  | i | 230245262 | 669  | - | C | 0.370 | 0.395 | 0.1455        | 0.90 | 1.00 | 0.383 | 0.382 | 0.9518        | 1.01 | 1.00 | 0.359 | 0.404 | <b>0.0455</b> | 0.83 | 0.99 |
|    | rs16856336        | i | 230245534 | 272  | - | G | 0.038 | 0.026 | 0.0675        | 1.44 | 1.00 | 0.039 | 0.024 | 0.1155        | 1.61 | 1.00 | 0.036 | 0.028 | 0.2934        | 1.32 | 1.00 |
| 32 | rs9661672         | i | 230245782 | 248  | - | G | 0.288 | 0.291 | 0.8563        | 0.99 | 1.00 | 0.271 | 0.276 | 0.8311        | 0.98 | 1.00 | 0.302 | 0.303 | 0.9927        | 1.00 | 1.00 |
| 32 | rs16856339        | i | 230245829 | 47   | - | C | 0.038 | 0.026 | 0.0675        | 1.44 | 1.00 | 0.039 | 0.024 | 0.1155        | 1.61 | 1.00 | 0.036 | 0.028 | 0.2934        | 1.32 | 1.00 |
| 32 | rs11122398        | i | 230246081 | 252  | - | C | 0.038 | 0.026 | 0.0532        | 1.47 | 1.00 | 0.039 | 0.024 | 0.1155        | 1.61 | 1.00 | 0.036 | 0.027 | 0.2355        | 1.37 | 1.00 |
| 32 | rs1360399         | i | 230246671 | 590  | - | T | 0.288 | 0.292 | 0.8273        | 0.98 | 1.00 | 0.271 | 0.277 | 0.7862        | 0.97 | 1.00 | 0.302 | 0.303 | 0.9927        | 1.00 | 1.00 |
| 32 | rs16856342        | i | 230246766 | 95   | - | C | 0.038 | 0.026 | 0.0532        | 1.47 | 1.00 | 0.039 | 0.024 | 0.1155        | 1.61 | 1.00 | 0.036 | 0.027 | 0.2355        | 1.37 | 1.00 |
| 32 | rs16856346        | i | 230246810 | 44   | - | C | 0.038 | 0.026 | 0.0532        | 1.47 | 1.00 | 0.039 | 0.024 | 0.1155        | 1.61 | 1.00 | 0.036 | 0.027 | 0.2355        | 1.37 | 1.00 |
| 32 | rs9727641         | i | 230246966 | 156  | - | T | 0.289 | 0.290 | 0.9168        | 0.99 | 1.00 | 0.272 | 0.276 | 0.8779        | 0.98 | 1.00 | 0.302 | 0.301 | 0.9689        | 1.00 | 1.00 |
| 32 | rs16856349        | i | 230247172 | 206  | - | T | 0.037 | 0.026 | 0.0659        | 1.45 | 1.00 | 0.039 | 0.024 | 0.1155        | 1.61 | 1.00 | 0.035 | 0.027 | 0.2914        | 1.33 | 1.00 |
| 32 | rs16856351        | i | 230247195 | 23   | - | C | 0.037 | 0.026 | 0.0659        | 1.45 | 1.00 | 0.039 | 0.024 | 0.1155        | 1.61 | 1.00 | 0.035 | 0.027 | 0.2914        | 1.33 | 1.00 |
| 32 | rs11802446        | i | 230247237 | 42   | - | T | 0.329 | 0.317 | 0.4827        | 1.05 | 1.00 | 0.315 | 0.304 | 0.6520        | 1.05 | 1.00 | 0.340 | 0.327 | 0.5653        | 1.06 | 1.00 |
|    | rs16856354        | i | 230247628 | 391  | - | T | 0.036 | 0.026 | 0.0812        | 1.42 | 1.00 | 0.039 | 0.024 | 0.1155        | 1.61 | 1.00 | 0.034 | 0.027 | 0.3568        | 1.28 | 1.00 |
|    | rs16856355        | i | 230247689 | 61   | - | G | 0.036 | 0.026 | 0.0812        | 1.42 | 1.00 | 0.039 | 0.024 | 0.1155        | 1.61 | 1.00 | 0.034 | 0.027 | 0.3568        | 1.28 | 1.00 |
|    | rs16856357        | i | 230247865 | 176  | - | G | 0.036 | 0.026 | 0.0812        | 1.42 | 1.00 | 0.039 | 0.024 | 0.1155        | 1.61 | 1.00 | 0.034 | 0.027 | 0.3568        | 1.28 | 1.00 |
|    | <b>rs16856363</b> | i | 230248334 | 469  | - | A | 0.029 | 0.018 | <b>0.0244</b> | 1.69 | 0.93 | 0.031 | 0.019 | 0.1565        | 1.63 | 1.00 | 0.028 | 0.016 | 0.0810        | 1.75 | 1.00 |

|                   |   |           |    |   |   |       |       |               |      |      |       |       |               |      |      |       |       |        |      |      |
|-------------------|---|-----------|----|---|---|-------|-------|---------------|------|------|-------|-------|---------------|------|------|-------|-------|--------|------|------|
| <b>rs16856365</b> | i | 230248348 | 14 | - | A | 0.029 | 0.018 | <b>0.0244</b> | 1.69 | 0.93 | 0.031 | 0.019 | 0.1565        | 1.63 | 1.00 | 0.028 | 0.016 | 0.0810 | 1.75 | 1.00 |
| <b>rs9308482</b>  | i | 230248438 | 90 | - | G | 0.091 | 0.074 | 0.0887        | 1.24 | 1.00 | 0.100 | 0.068 | <b>0.0273</b> | 1.52 | 0.95 | 0.083 | 0.079 | 0.7685 | 1.05 | 1.00 |

<sup>1</sup> Haplotype-blocks are defined according to Gabriel et al. (2002). <sup>2</sup> i = imputed SNP markers, g = genotyped SNP markers. <sup>3</sup> AAS = Amino-acid-substitution. <sup>4</sup> Minor allele in controls (MA). <sup>5</sup> MA frequency (MAF) in patients. <sup>6</sup> MAF in controls. <sup>7</sup> p-values single-marker association analysis. <sup>8</sup> p-values after a correction procedure (10,000 permutations). <sup>9</sup> SNPs showing Hardy-Weinberg-Disequilibrium (HWD) in controls (see also Supplementary Table 7).

### Supplementary Table 3

*DISC*-markers with disease association in the present study and in independent studies. Only markers that consistently showed association with the same allele are listed. For all five markers, all published schizophrenia associations are summarized.

| SNP       | Block | Hennah et al. (18) |      |      |          |       |       |        |      |      |          |      |      | Hodgkinson et al. (7) | Sullivan et al. (19) | Hashimoto et al. (12) | Wood et al. (16) | Sanders et al. (17) | Present Study                     |        |       |   |
|-----------|-------|--------------------|------|------|----------|-------|-------|--------|------|------|----------|------|------|-----------------------|----------------------|-----------------------|------------------|---------------------|-----------------------------------|--------|-------|---|
|           |       | Edinburgh          |      |      | Aberdeen |       |       | London |      |      | Helsinki |      |      |                       |                      |                       |                  |                     | all (no gender-specific analysis) | all    | ♀     | ♂ |
|           |       | all                | ♀    | ♂    | all      | ♀     | ♂     | all    | ♀    | ♂    | all      | ♀    | ♂    |                       |                      |                       |                  |                     |                                   |        |       |   |
| rs1655285 | 1     | n.s.               | n.s. | n.s. | 0.016    | n.s.  | 0.016 | n.s.   | n.s. | n.s. | n.s.     | n.s. | n.s. | -                     | -                    | -                     | -                | -                   | n.s.                              | n.s.   | 0.015 |   |
| rs2812393 | 12    | -                  | -    | -    | -        | -     | -     | -      | -    | -    | -        | -    | -    | 0.048                 | n.s.                 | -                     | -                | n.s.                | n.s.                              | n.s.   | 0.048 |   |
| rs9432024 | 22    | -                  | -    | -    | -        | -     | -     | -      | -    | -    | -        | -    | -    | 0.019                 | n.s.                 | -                     | -                | -                   | n.s.                              | 0.0008 | n.s.  |   |
| rs999710  | 22    | -                  | -    | -    | -        | -     | -     | -      | -    | -    | -        | -    | -    | 0.003                 | -                    | 0.05                  | n.s.             | n.s.                | n.s.                              | 0.0002 | n.s.  |   |
| rs821631  | 27    | n.s.               | n.s. | n.s. | n.s.     | 0.043 | 0.014 | n.s.   | n.s. | n.s. | n.s.     | n.s. | n.s. | -                     | n.s.                 | -                     | n.s.             | n.s.                | n.s.                              | 0.0392 | n.s.  |   |

n.s.: not significant. -: not analyzed.

## Supplementary Table 4

Significant haplotype association results in cases and controls at the *DISC* locus

| Haplotype-block | Haplotype    | % Patients | % Controls | p-value |
|-----------------|--------------|------------|------------|---------|
| <b>All</b>      |              |            |            |         |
| 3               | ACGAGATG     | 0.157      | 0.132      | 0.0390  |
| 22              | ACCAACGAG    | 0.169      | 0.197      | 0.0389  |
| <b>Females</b>  |              |            |            |         |
| 2               | ACACG        | 0.029      | 0.057      | 0.0112  |
| 3               | GCGAAGTG     | 0.024      | 0.046      | 0.0260  |
| 7               | CAGAC        | 0.005      | 0.016      | 0.0424  |
| 7               | CGAGC        | 0.093      | 0.062      | 0.0310  |
| 12              | ATCG         | 0.437      | 0.383      | 0.0393  |
| 13              | GCGAACTCGC   | 0.080      | 0.121      | 0.0107  |
| 20              | CCGCCCGCACCA | 0.098      | 0.131      | 0.0492  |
| 22              | GTCGACTGG    | 0.411      | 0.310      | 0.00009 |
| 22              | ACCAACGAG    | 0.162      | 0.210      | 0.0186  |
| 23              | GTAT         | 0.070      | 0.036      | 0.0037  |
| 31              | TTGA         | 0.141      | 0.183      | 0.0324  |
| <b>Males</b>    |              |            |            |         |
| 1               | AACGCGAAACA  | 0.107      | 0.070      | 0.00536 |
| 3               | ACGAGATG     | 0.159      | 0.124      | 0.0302  |
| 3               | GCGAAGTG     | 0.051      | 0.032      | 0.0448  |
| 28              | CGGG         | 0.098      | 0.147      | 0.0015  |
| 28              | CAGC         | 0.539      | 0.484      | 0.0196  |

### Supplementary Table 5

Locus-specific *DISC* interaction in male cases and male controls. Single-marker association at rs1538979 in the stratified sample using rs821633 as a conditional marker (genotypes GG/GA).

| SNP       | MA <sup>1</sup> | % Cases (n=230) <sup>2</sup> | % Controls (n=283) <sup>3</sup> | p-value <sup>4</sup> | OR   | p-value all <sup>5</sup> | OR all <sup>5</sup> |
|-----------|-----------------|------------------------------|---------------------------------|----------------------|------|--------------------------|---------------------|
| rs1538979 | A               | 0.153                        | 0.103                           | <b>0.0163</b>        | 1.57 | 0.0889                   | 1.27                |

<sup>1</sup> Minor allele in controls (MA). <sup>2</sup> MA frequency (MAF) in allele-stratified male patients. <sup>3</sup> MAF in allele-stratified male controls. <sup>4</sup> p-value interplay-analysis. <sup>5</sup> p-value and OR in the non-stratified male sample.

## Supplementary Table 6

DISC-meta-analysis in nine schizophrenia case-control samples from European populations. Study and sample information are presented. For each SNP the included samples are marked with an “x” and associations across samples are presented using the weighted Z-score method (*Comprehensive Meta Analysis v. 2* (<http://www.meta-analysis.com/pages/comparisons.html>)).

|            |           | Study name    |                  |                       |                     |                      |                    |          |         |          |              |
|------------|-----------|---------------|------------------|-----------------------|---------------------|----------------------|--------------------|----------|---------|----------|--------------|
|            |           | Present Study | Wood et al. (16) | Hodgkinson et al. (7) | Sanders et al. (17) | Sullivan et al. (19) | Hennah et al. (18) |          |         |          |              |
|            |           |               |                  |                       |                     |                      | Edinburgh          | Aberdeen | London  | Helsinki |              |
| Cases      |           | 782           | 311              | 196                   | 1870                | 738                  | 328                | 256      | 348     | 343      |              |
| Controls   |           | 839           | 291              | 217                   | 2002                | 733                  | 315                | 255      | 351     | 342      |              |
| Population |           | German        | US-European      | US-European           | US-European         | US-European          | Scottish           | Scottish | British | Finnish  |              |
| SNP        | Position  |               |                  |                       |                     |                      |                    |          |         |          | p-value      |
| rs4658879  | 229809198 | x             | x                |                       |                     |                      | x                  | x        | x       | x        | <b>0.033</b> |
| rs1572899  | 229892113 | x             |                  | x                     |                     |                      | x                  | x        | x       | x        | <b>0.019</b> |
| rs3738401  | 229896918 | x             | x                |                       | x                   | x                    | x                  | x        | x       | x        | 0.091        |
| rs1934909  | 229917902 | x             | x                |                       | x                   |                      | x                  | x        | x       | x        | 0.166        |
| rs2812385  | 229930625 | x             | x                |                       |                     |                      | x                  | x        | x       | x        | <b>0.036</b> |
| rs2812388  | 229931999 | x             | x                |                       |                     |                      | x                  | x        | x       | x        | 0.205        |
| rs12027635 | 229939821 | x             | x                |                       | x                   | x                    |                    |          |         |          | 0.233        |
| rs1538979  | 229963491 | x             |                  |                       |                     | x                    | x                  | x        | x       | x        | <b>0.004</b> |
| rs17749164 | 229963830 | x             | x                |                       | x                   |                      | x                  | x        | x       | x        | 0.086        |
| rs7529706  | 229966552 | x             | x                |                       |                     |                      | x                  | x        | x       | x        | 0.152        |
| rs2812389  | 229977634 | x             | x                |                       |                     |                      | x                  | x        | x       | x        | 0.103        |
| rs16854954 | 229979215 | x             | x                |                       |                     |                      | x                  | x        | x       | x        | 0.077        |
| rs16854957 | 229979516 | x             | x                |                       |                     | x                    | x                  | x        | x       | x        | <b>0.017</b> |
| rs2812393  | 229980296 | x             |                  | x                     | x                   | x                    |                    |          |         |          | 0.143        |
| rs17766087 | 229984500 |               | x                |                       | x                   |                      | x                  | x        | x       | x        | 0.059        |
| rs17817356 | 229986844 | x             |                  |                       |                     | x                    | x                  | x        | x       | x        | <b>0.002</b> |
| rs17817463 | 229988905 | x             |                  |                       | x                   |                      | x                  | x        | x       | x        | 0.132        |
| rs11590192 | 229989468 |               | x                |                       | x                   | x                    |                    |          |         |          | 0.108        |
| rs1322784  | 229995558 | x             |                  | x                     | x                   |                      | x                  | x        | x       | x        | <b>0.015</b> |
| rs2255340  | 230002773 | x             |                  | x                     | x                   |                      |                    |          |         |          | 0.127        |
| rs2738864  | 230004103 | x             |                  | x                     | x                   |                      |                    |          |         |          | 0.127        |
| rs1407598  | 230013448 | x             |                  | x                     | x                   |                      |                    |          |         |          | 0.245        |
| rs967244   | 230015269 |               | x                |                       | x                   |                      | x                  | x        | x       | x        | 0.077        |



|            |           |   |  |   |  |   |  |   |   |   |   |              |
|------------|-----------|---|--|---|--|---|--|---|---|---|---|--------------|
| rs2738877  | 230016229 |   |  | x |  | x |  | x | x | x | x | 0.463        |
| rs6675281  | 230020724 | x |  | x |  | x |  | x | x | x | x | 0.022        |
| rs1000731  | 230030114 | x |  | x |  | x |  |   |   |   |   | 0.252        |
| rs12731570 | 230048561 |   |  | x |  | x |  | x | x | x | x | 0.390        |
| rs12090070 | 230051472 | x |  | x |  |   |  | x |   |   |   | 0.662        |
| rs1015101  | 230074317 | x |  |   |  |   |  | x | x | x | x | 0.051        |
| rs999710   | 230077566 | x |  | x |  | x |  |   |   |   |   | 0.048        |
| rs11122362 | 230086482 | x |  | x |  | x |  | x | x | x | x | 0.055        |
| rs967433   | 230098438 | x |  |   |  | x |  | x | x | x | x | 0.331        |
| rs860275   | 230102768 | x |  | x |  |   |  | x | x | x | x | <b>0.003</b> |
| rs11577215 | 230103529 | x |  | x |  | x |  |   |   |   |   | 0.325        |
| rs7541019  | 230117808 | x |  |   |  |   |  | x | x | x | x | <b>0.025</b> |
| rs2038636  | 230121872 | x |  | x |  | x |  |   |   |   |   | <b>0.043</b> |
| rs821577   | 230133680 | x |  |   |  |   |  | x | x | x | x | <b>0.022</b> |
| rs821581   | 230143695 | x |  | x |  | x |  |   |   |   |   | 0.181        |
| rs4658966  | 230145237 | x |  | x |  |   |  | x | x | x | x | 0.136        |
| rs2772122  | 230157116 |   |  | x |  | x |  | x | x | x | x | 0.346        |
| rs11122381 | 230160730 | x |  | x |  |   |  | x |   | x | x | 0.163        |
| rs821592   | 230160882 | x |  |   |  | x |  | x | x | x | x | 0.107        |
| rs821616   | 230211221 |   |  | x |  | x |  | x | x | x | x | 0.528        |
| rs821631   | 230214758 |   |  | x |  | x |  | x | x | x | x | 0.136        |
| rs3524     | 230225302 |   |  | x |  | x |  | x | x | x | x | 0.394        |
| rs1160491  | 230228516 |   |  | x |  | x |  | x | x | x | x | 0.197        |
| rs2806465  | 230232917 |   |  |   |  | x |  | x | x | x | x | 0.240        |
| rs9726024  | 230235123 | x |  | x |  | x |  |   |   |   |   | 0.450        |
| rs16856308 | 230238240 | x |  | x |  |   |  | x | x | x | x | 0.114        |
| rs980989   | 230242818 | x |  | x |  | x |  | x |   |   |   | 0.319        |

### Supplementary Table 7

Single-marker association at the *DISC* locus: SNPs with significant deviations from Hardy-Weinberg-Equilibrium (HWE) in controls are shown for the entire sample (all) and for each gender-specific sample (females and males). None of the SNPs with HWD contributed to the association findings.

| SNP        | All         |          | Females    |          | Males      |          |
|------------|-------------|----------|------------|----------|------------|----------|
|            | Genotypes   | p-value  | Genotypes  | p-value  | Genotypes  | p-value  |
| rs17804163 | 65/147/628  | 2.38E-21 | 28/56/277  | 8.35E-12 | 37/91/351  | 3.01E-11 |
| rs1538975  | 98/339/405  | 0.03891  |            |          |            |          |
| rs12135059 | 78/314/452  | 0.03229  |            |          |            |          |
| rs12143549 | 78/314/452  | 0.03229  |            |          |            |          |
| rs12744978 | 79/317/448  | 0.04096  |            |          |            |          |
| rs11122347 | 105/345/394 | 0.03507  |            |          |            |          |
| rs11122348 | 21/286/537  | 0.02039  |            |          |            |          |
| rs2812393  |             |          | 69/156/136 | 0.04967  |            |          |
| rs17817463 |             |          | 11/74/275  | 0.04037  |            |          |
| rs1322783  |             |          | 14/83/264  | 0.04001  |            |          |
| rs860275   |             |          | 3/104/254  | 0.03851  |            |          |
| rs16841582 |             |          |            |          | 75/203/204 | 0.04936  |

### Supplementary Table 8

Phenotypic composition of the patient sample: All subphenotypes used for stratification are presented for the entire sample and gender-specific samples (early age at onset (EAO), family history of psychiatric illness in first and second degree relatives (FAM), and lifetime history of depressive symptoms (DEP)). The percentage of patients showing a specific subphenotype is given in brackets.

|                  |        | Non-stratified Sample |                  |                | EAO <sup>1</sup> |                 |                | FAM          |                |               | DEP          |                 |                |
|------------------|--------|-----------------------|------------------|----------------|------------------|-----------------|----------------|--------------|----------------|---------------|--------------|-----------------|----------------|
|                  |        | all<br>N=782          | females<br>n=354 | males<br>n=428 | all<br>n=194     | females<br>n=81 | males<br>n=113 | all<br>n=131 | female<br>n=67 | males<br>n=64 | all<br>n=232 | female<br>n=127 | males<br>n=105 |
| EAO <sup>1</sup> | all    | 194 (24.8%)           |                  |                |                  |                 |                | 34 (25.9%)   |                |               | 58 (25.0%)   |                 |                |
|                  | female | 81 (22.8%)            |                  |                |                  |                 |                | 18 (26.8%)   |                |               | 30 (23.6%)   |                 |                |
|                  | males  | 113 (26.4%)           |                  |                |                  |                 |                | 16 (25.0%)   |                |               | 28 (26.6%)   |                 |                |
| FAM              | all    | 131 (16.7%)           |                  |                | 34 (17.5%)       |                 |                |              |                |               | 39 (16.8%)   |                 |                |
|                  | female | 67 (18.9%)            |                  |                | 18 (22.2%)       |                 |                |              |                |               | 23 (18.1%)   |                 |                |
|                  | males  | 64 (14.9%)            |                  |                | 16 (14.1%)       |                 |                |              |                |               | 16 (15.2%)   |                 |                |
| DEP              | all    | 232 (29.6%)           |                  |                | 58 (29.8%)       |                 |                | 39 (29.7%)   |                |               |              |                 |                |
|                  | female | 127 (35.8%)           |                  |                | 30 (37.0%)       |                 |                | 23 (34.3%)   |                |               |              |                 |                |
|                  | males  | 105 (24.5%)           |                  |                | 28 (24.7%)       |                 |                | 16 (25.0%)   |                |               |              |                 |                |

<sup>1</sup> The mean age at onset for schizophrenia was 26.37 years in the entire sample (27.14 years in the female subsample, and 25.69 years in the male subsample).

## SUPPLEMENTARY REFERENCES

1. Falush, D., Stephens, M., Pritchard, J.K. (2003) Inference of population structure using multilocus genotype data: linked loci and correlated allele frequencies. *Genetics*, **164**, 1567-1587.
2. Pritchard, J.K., Stephens, M., Donnelly, P. (2000) Inference of population structure using multilocus genotype data. *Genetics*, **155**, 945-959.
3. Hoefgen, B., Schulze, T.G., Ohlraun, S., von Widdern, O., Höfels, S., Gross, M. *et al.* (2005) The power of sample size and homogenous sampling: association between the 5-HTTLPR serotonin transporter polymorphism and major depressive disorder. *Biol. Psychiatry*, **57**, 247-251.
4. Gabriel, S.B., Schaffner, S.F., Nguyen, H., Moore, J.M., Roy, J., Blumenstiel, B., Higgins, J., DeFelice, M., Lochner, A., Faggart, M. *et al.* (2002) The structure of haplotype blocks in the human genome. *Science*, **296**, 2225-2229.
5. Chubb, J.E., Bradshaw, N.J., Soares, D.C., Porteous, D.J., Millar, J.K. (2008) The DISC locus in psychiatric illness. *Mol. Psychiatry*, **13**, 36-64.
6. Hennah, W., Varilo, T., Kestilä, M., Paunio, T., Arajärvi, R., Haukka, J., Parker, A., Martin, R., Levitzky, S., Partonen, T. *et al.* (2003) Haplotype transmission analysis provides evidence of association for DISC1 to schizophrenia and suggests sex-dependent effects. *Hum. Mol. Genet.*, **12**, 3151-3159.
7. Hodgkinson, C.A., Goldman, D., Jaeger, J., Persaud, S., Kane, J.M., Lipsky, R.H., Malhotra, A.K. (2004) Disrupted in schizophrenia 1 (DISC1): association with schizophrenia, schizoaffective disorder, and bipolar disorder. *Am. J. Hum. Genet.*, **75**, 862-872

8. Kockelkorn, T.T., Arai, M., Matsumoto, H., Fukuda, N., Yamada, K., Minabe, Y., Toyota, T., Ujike, H., Sora, I., Mori, N. *et al.* (2004) Association study of polymorphisms in the 5' upstream region of human DISC1 gene with schizophrenia. *Neurosci. Lett.*, **368**, 41-45.
9. Callicott, J.H., Straub, R.E., Pezawas, L., Egan, M.F., Mattay, V.S., Hariri, A.R., Verchinski, B.A., Meyer-Lindenberg, A., Balkissoon, R., Kolachana, B. *et al.* (2005) Variation in DISC1 affects hippocampal structure and function and increases risk for schizophrenia. *Proc. Natl. Acad. Sci. U S A*, **102**, 8627-8632.
10. Thomson, P.A., Wray, N.R., Millar, J.K., Evans, K.L., Hellard, S.L., Condie, A., Muir, W.J., Blackwood, D.H., Porteous, D.J. (2005) Association between the TRAX/DISC locus and both bipolar disorder and schizophrenia in the Scottish population. *Mol. Psychiatry*, **10**, 657-668.
11. Zhang, X., Tochigi, M., Ohashi, J., Maeda, K., Kato, T., Okazaki, Y., Kato, N., Tokunaga, K., Sawa, A., Sasaki, T. (2005) Association study of the DISC1/TRAX locus with schizophrenia in a Japanese population. *Schizophr. Res.*, **79**, 175-180.
12. Hashimoto, R., Numakawa, T., Ohnishi, T., Kumamaru, E., Yagasaki, Y., Ishimoto, T., Mori, T., Nemoto, K., Adachi, N., Izumi, A. *et al.* (2006) Impact of the DISC1 Ser704Cys polymorphism on risk for major depression, brain morphology and ERK signaling. *Hum. Mol. Genet.*, **15**, 3024-3033.
13. Zhang, F., Sarginson, J., Crombie, C., Walker, N., St Clair, D., Shaw, D. (2006) Genetic association between schizophrenia and the DISC1 gene in the Scottish population. *Am. J. Med. Genet.*, **141**, 155-159.
14. Chen, Q.Y., Chen, Q., Feng, G.Y., Lindpaintner, K., Wang, L.J., Chen, Z.X., Gao, Z.S., Tang, J.S., Huang, G., He, L. (2007) Case-control association study of Disrupted-in-

- Schizophrenia-1 (DISC1) gene and schizophrenia in the Chinese population. *J. Psychiatr. Res.*, **41**, 428-434.
15. Qu, M., Tang, F., Yue, W., Ruan, Y., Lu, T., Liu, Z., Zhang, H., Han, Y., Zhang, D., Wang, F. *et al.* (2007) Positive association of the Disrupted-in-Schizophrenia-1 gene (DISC1) with schizophrenia in the Chinese Han population. *Am. J. Med. Genet.*, **144**, 266-270.
  16. Wood, L.S., Pickering, E.H., Dechairo, B.M. (2007) Significant support for DAO as a schizophrenia susceptibility locus: examination of five genes putatively associated with schizophrenia. *Biol. Psychiatry*, **61**, 1195-1199.
  17. Sanders, A.R., Duan, J., Levinson, D.F., Shi, J., He, D., Hou, C., Burrell, G.J., Rice, J.P., Nertney, D.A., Olincy, A. *et al.* (2008) No Significant Association of 14 Candidate Genes With Schizophrenia in a Large European Ancestry Sample: Implications for Psychiatric Genetics. *Am. J. Psychiatry*, **165**, 497-506.
  18. Hennah, W., Thomson, P., McQuillin, A., Bass, N., Loukola, A., Anjorin, A., Blackwood, D., Curtis, D., Deary, I.J., Harris, S.E. *et al.* (2008) DISC1 association, heterogeneity and interplay in schizophrenia and bipolar disorder. *Mol. Psychiatry*, Epub ahead of print
  19. Sullivan, P.F., Lin, D., Tzeng, J.Y., van den Oord, E., Perkins D., Stroup, T.S., Wagner, M., Lee, S., Wright, F.A., Zou, F. *et al.* (2008) Genomewide association for schizophrenia in the CATIE study: results of stage 1. *Mol. Psychiatry*, **13**, 570-584.
  20. Purcell, S., Cherny, S.S., Sham, P.C. (2003) Genetic Power Calculator: design of linkage and association genetic mapping studies of complex traits. *Bioinformatics*, **19**, 149-150.
  21. Lencz, T., Morgan, T.V., Athanasiou, M., Dain, B., Reed, C.R., Kane, J.M., Kucherlapati, R., Malhotra, A.K. (2007) Converging evidence for a pseudoautosomal cytokine receptor gene locus in schizophrenia. *Mol. Psychiatry*, **12**, 572-580.
